# Supplementary material for: Carba‐Sugar Analogs of Glucosamine‐6‐Phosphate: New Activators for the glmS Riboswitch
Source: PubMed Central journal article supplement — Chemistry. 2022 Nov 27;29(3):e202202378. doi: 10.1002/chem.202202378 (PMC10099210; doi:10.1002/chem.202202378), 2022-11-27
Supplement: CHEM-29-0-s001.pdf [file CHEM-29-0-s001.pdf]

# Chemistry–A European Journal

Supporting Information

## **Carba-Sugar Analogs of Glucosamine-6-Phosphate: New Activators for the *glmS* Riboswitch**

David Stängle, Bjarne Silkenath, Paul Gehle, Anna Esser, Günter Mayer,\* and  
Valentin Wittmann\*

## **Contents**

NMR spectra of synthesized compounds

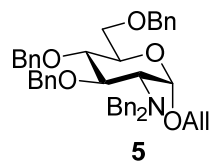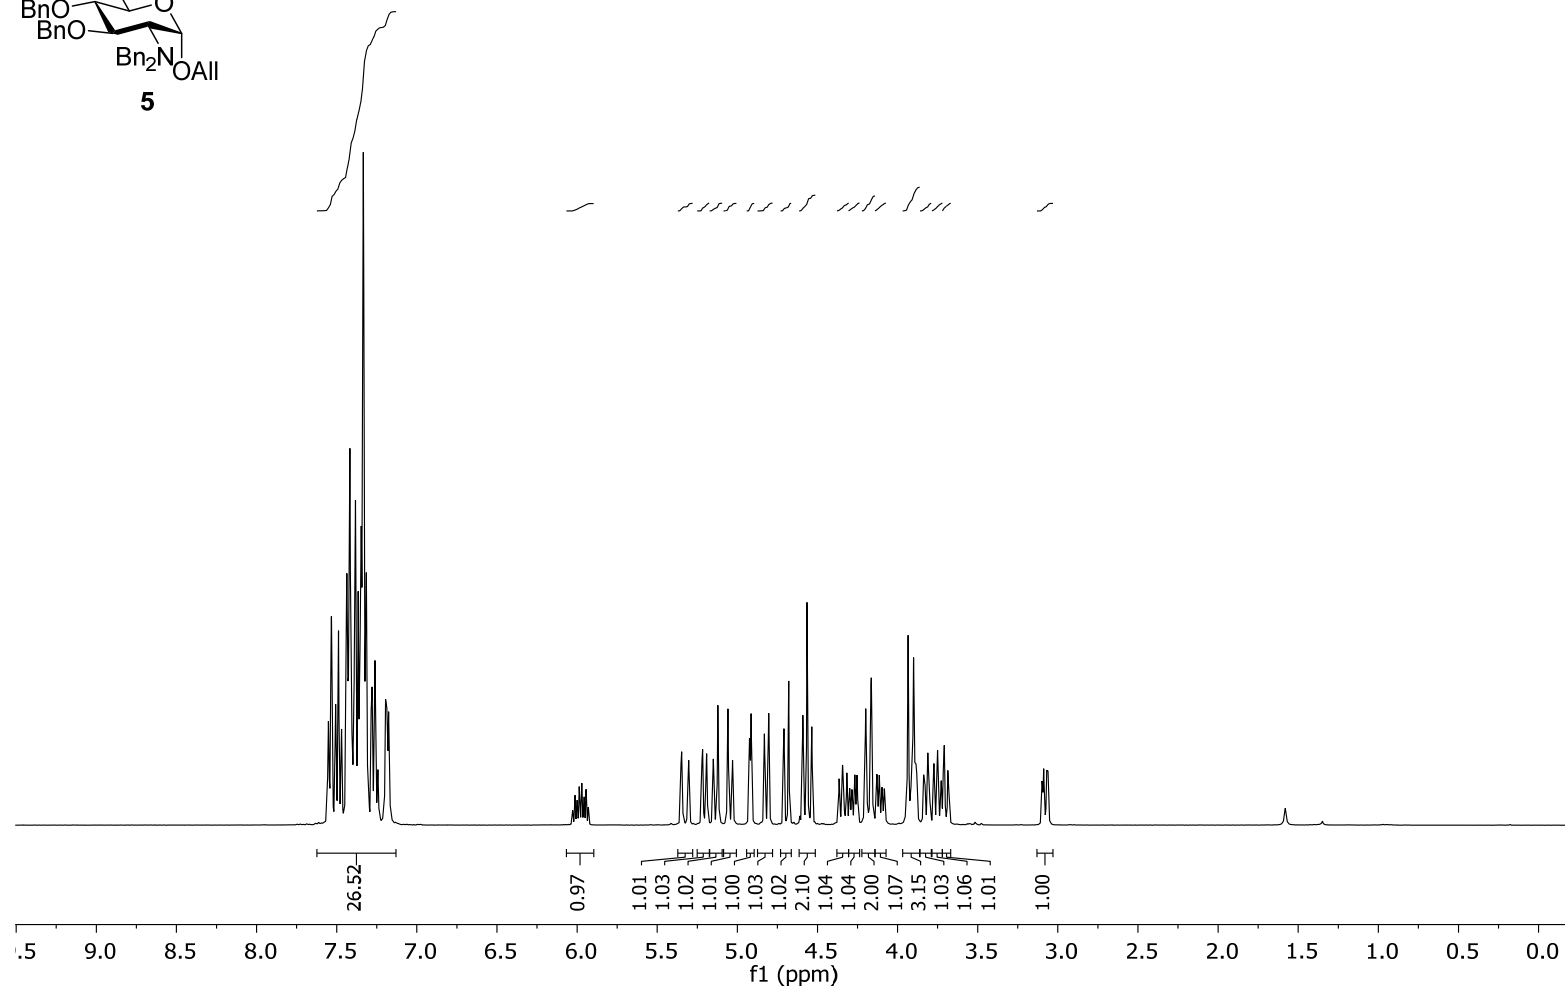

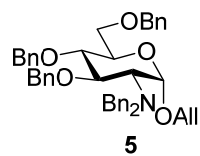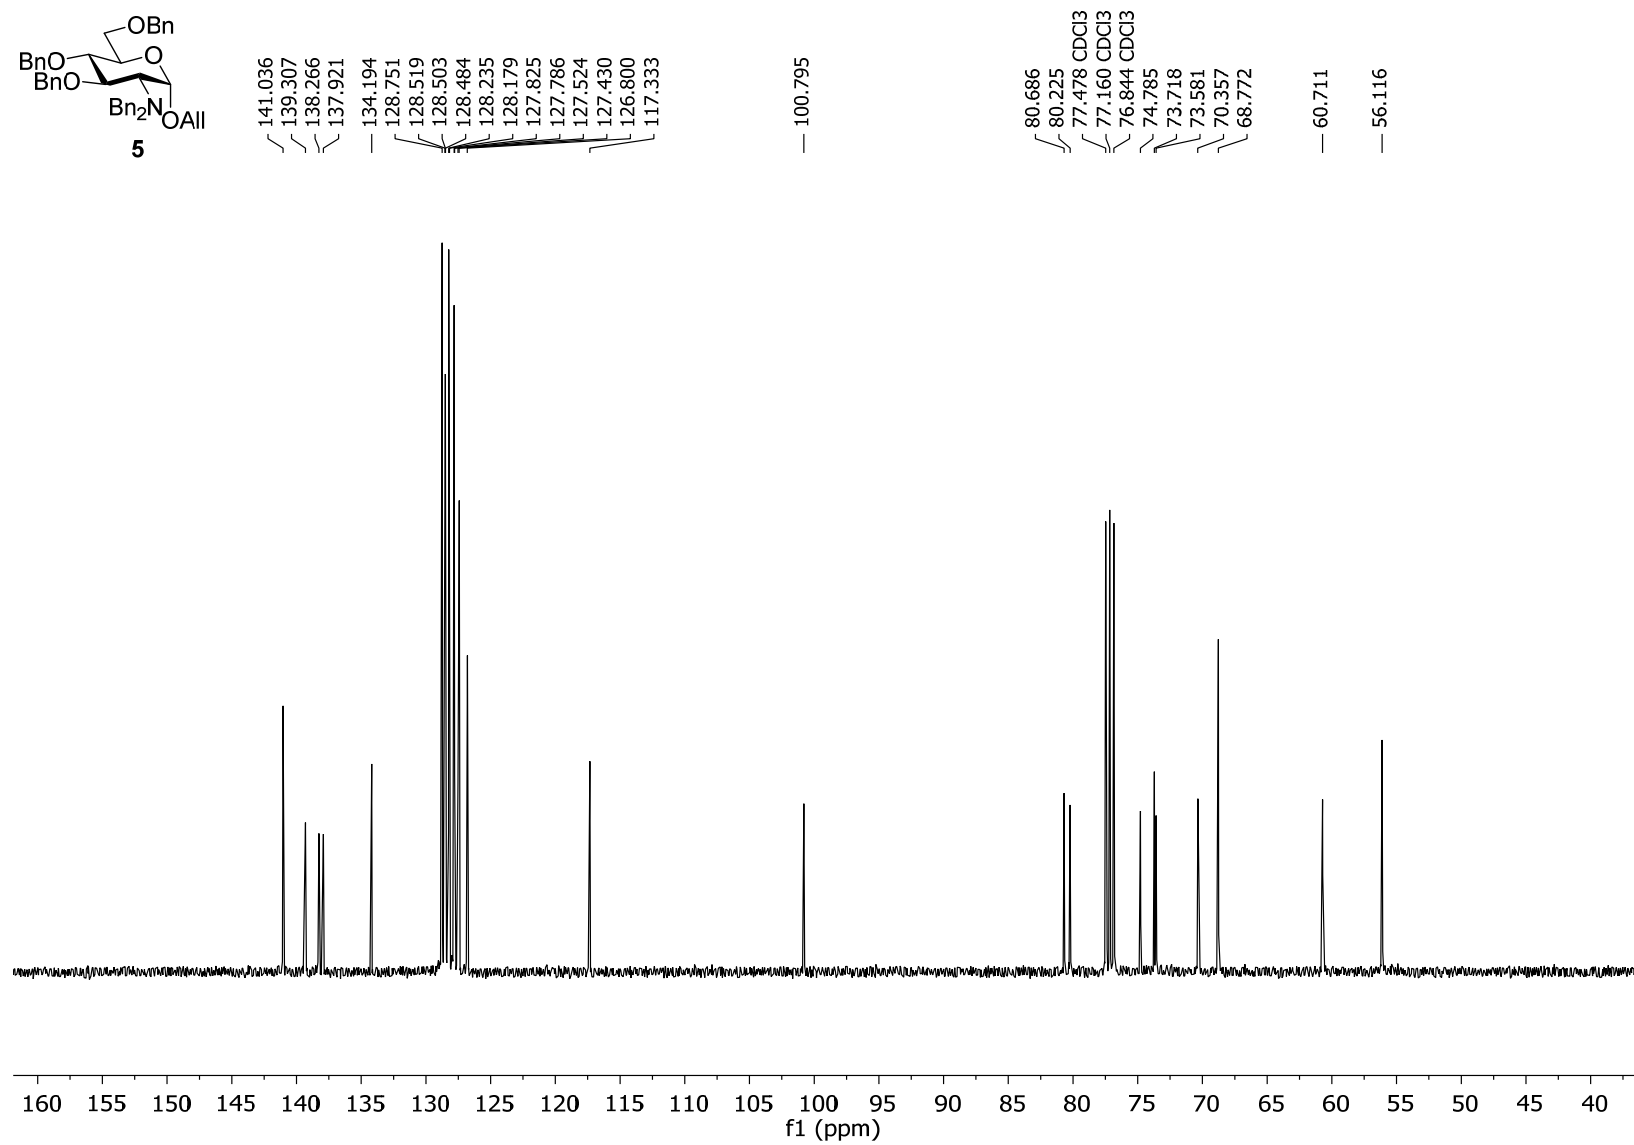

<sup>13</sup>C NMR spectrum (101 MHz, CDCl<sub>3</sub>) of **5a**

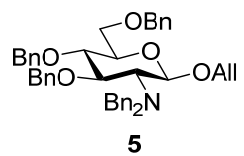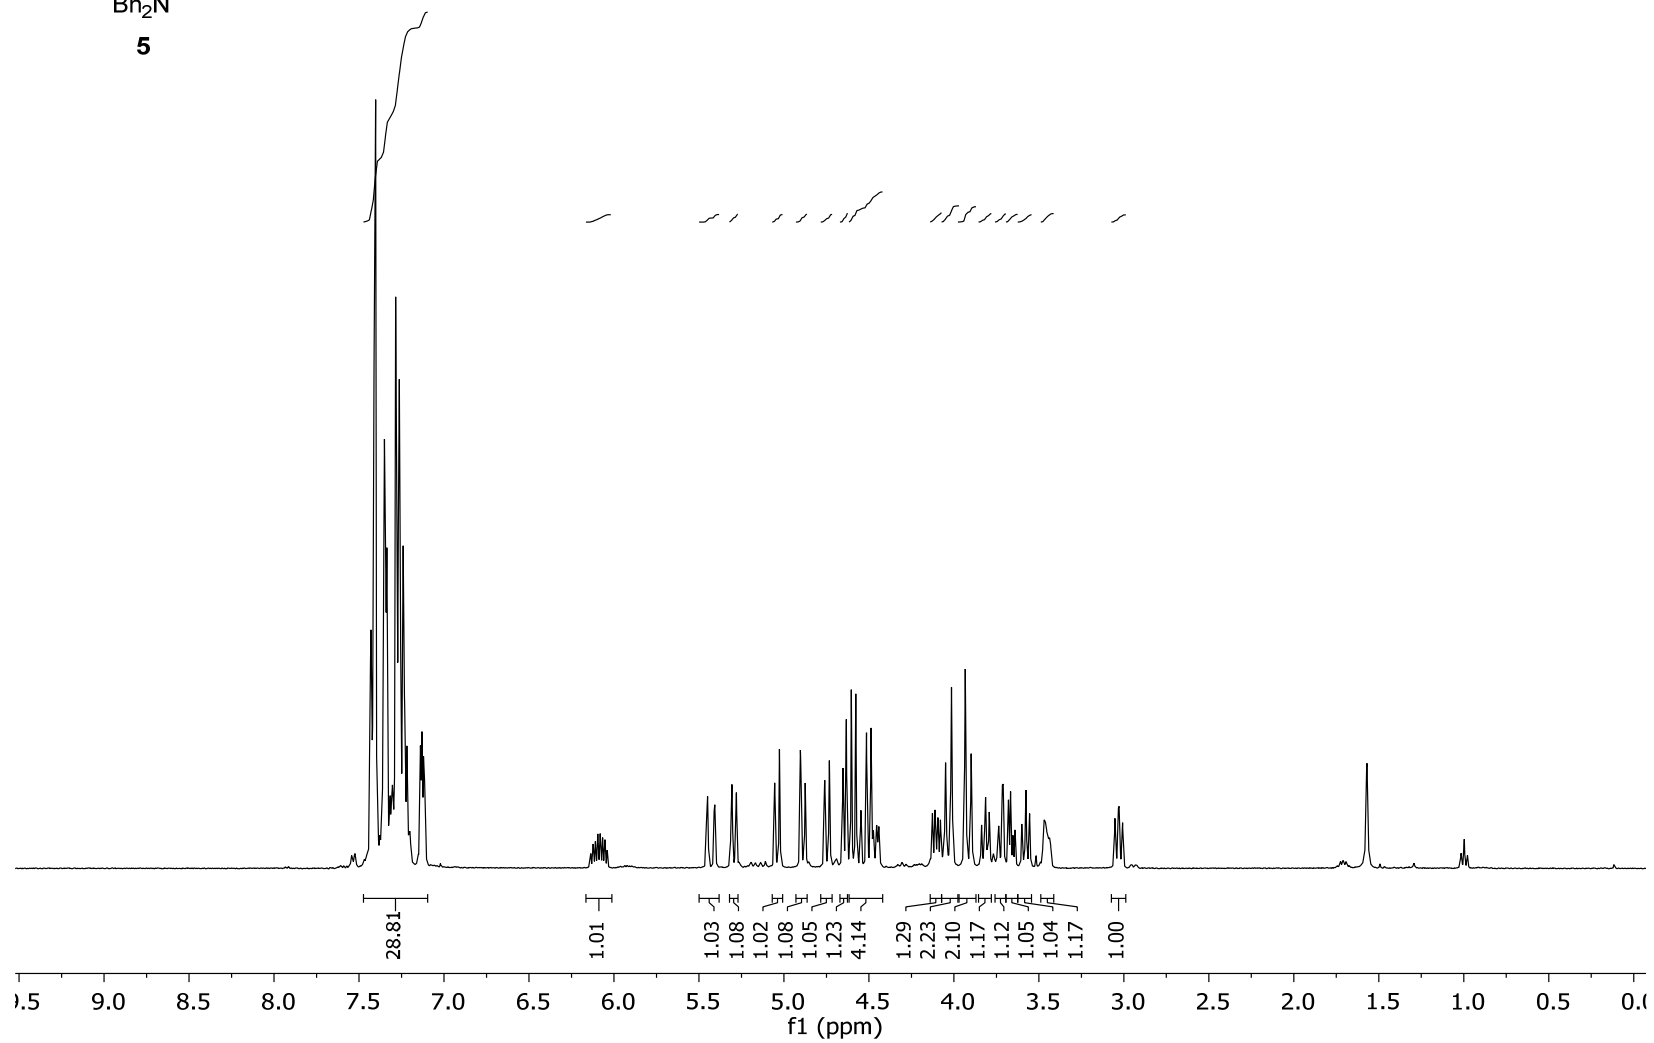

$^1\text{H}$  NMR spectrum (400 MHz,  $\text{CDCl}_3$ ) of **5 $\beta$**

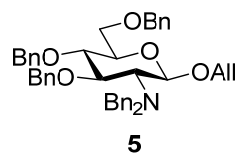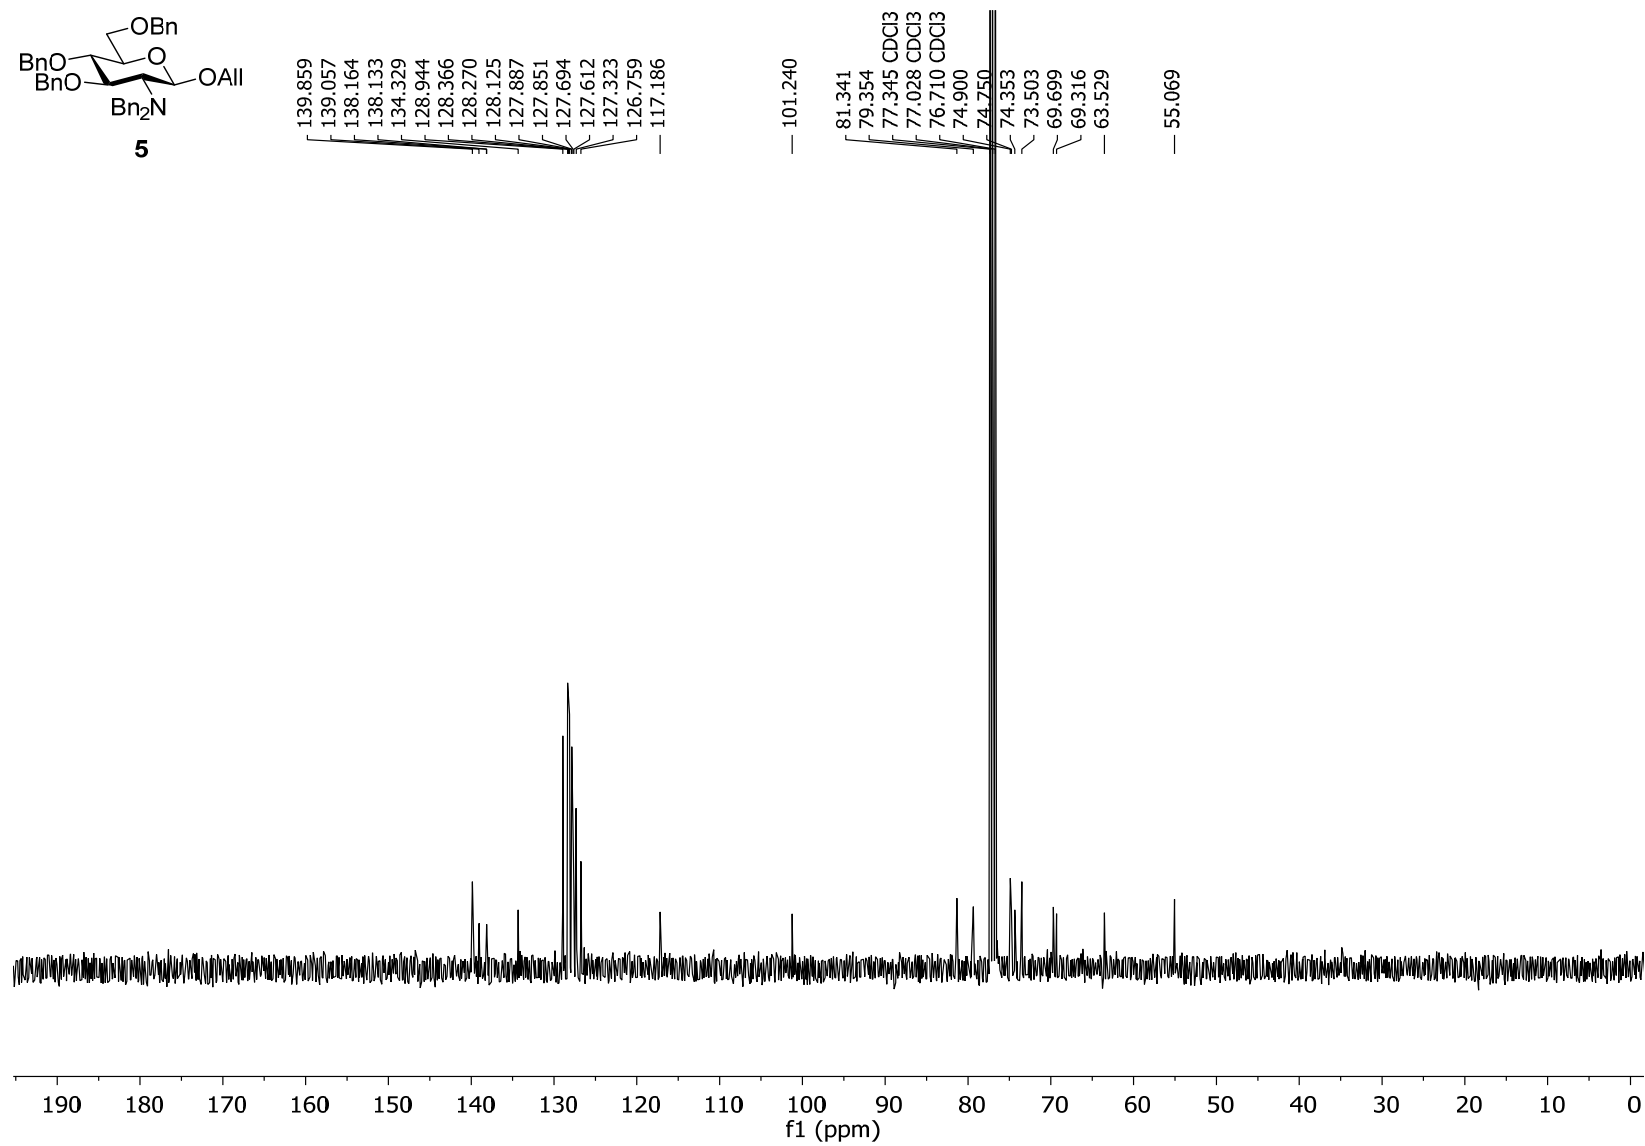

<sup>13</sup>C NMR spectrum (101 MHz, CDCl<sub>3</sub>) of **5β**

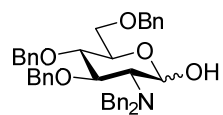

**6**

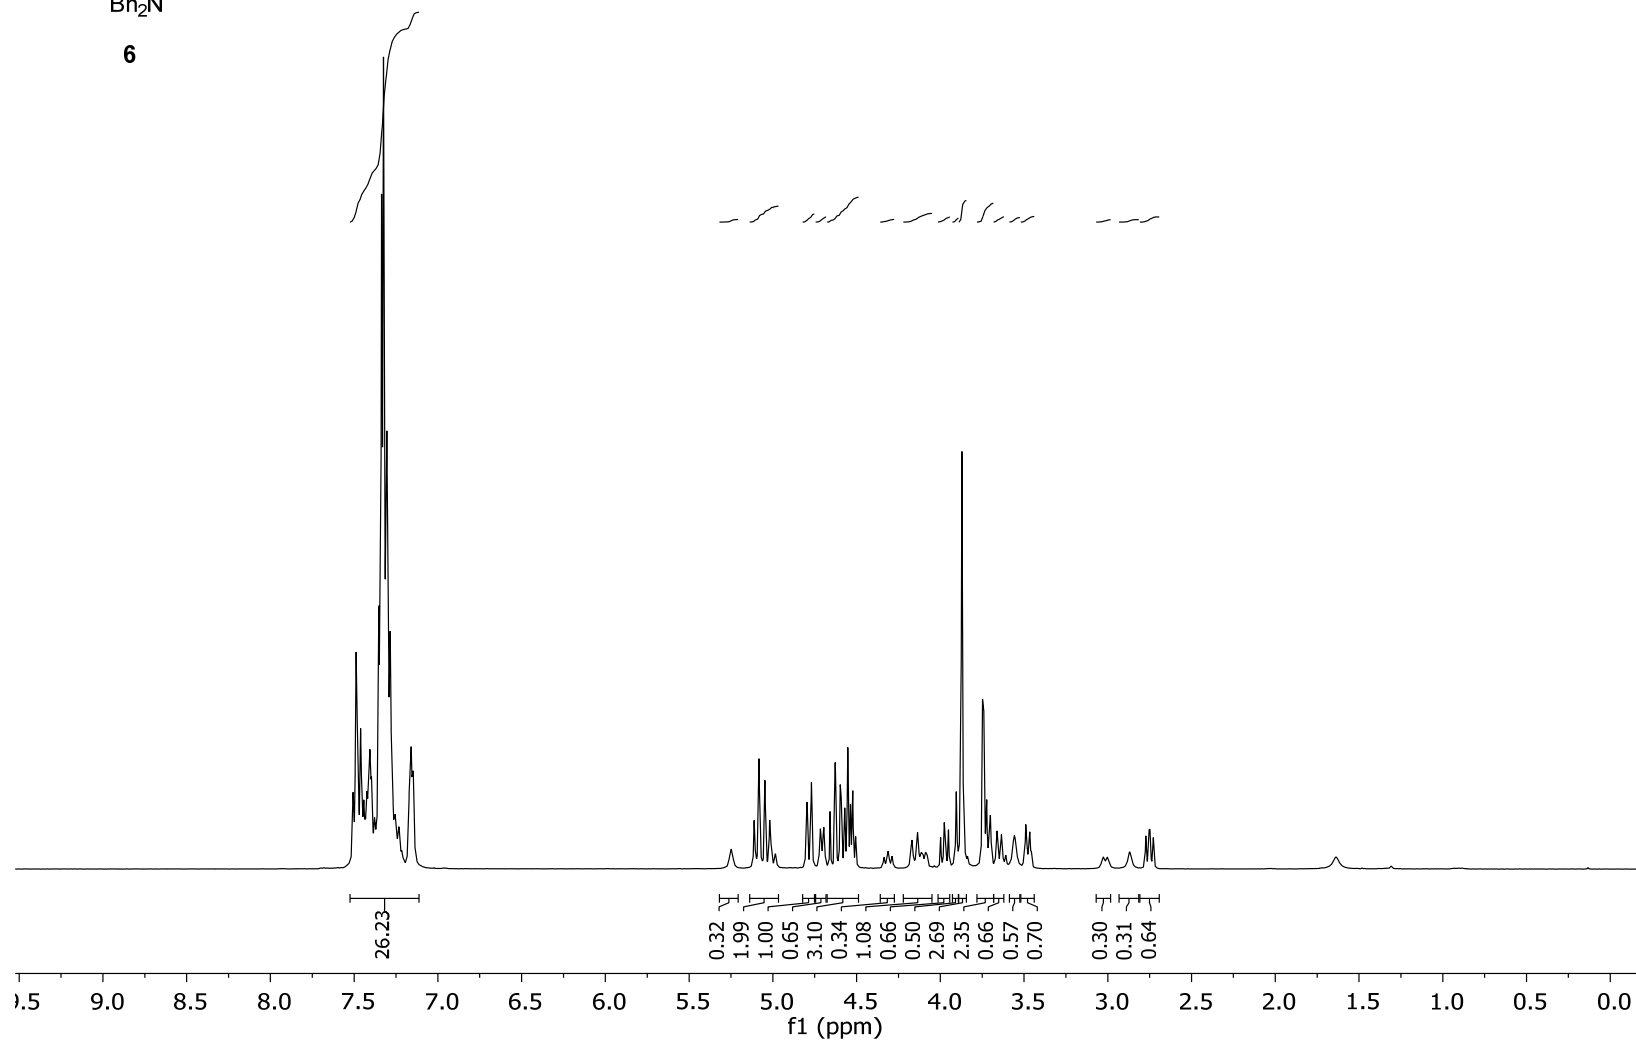

$^1\text{H}$  NMR spectrum (400 MHz,  $\text{CDCl}_3$ ) of **6**

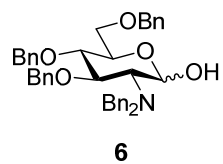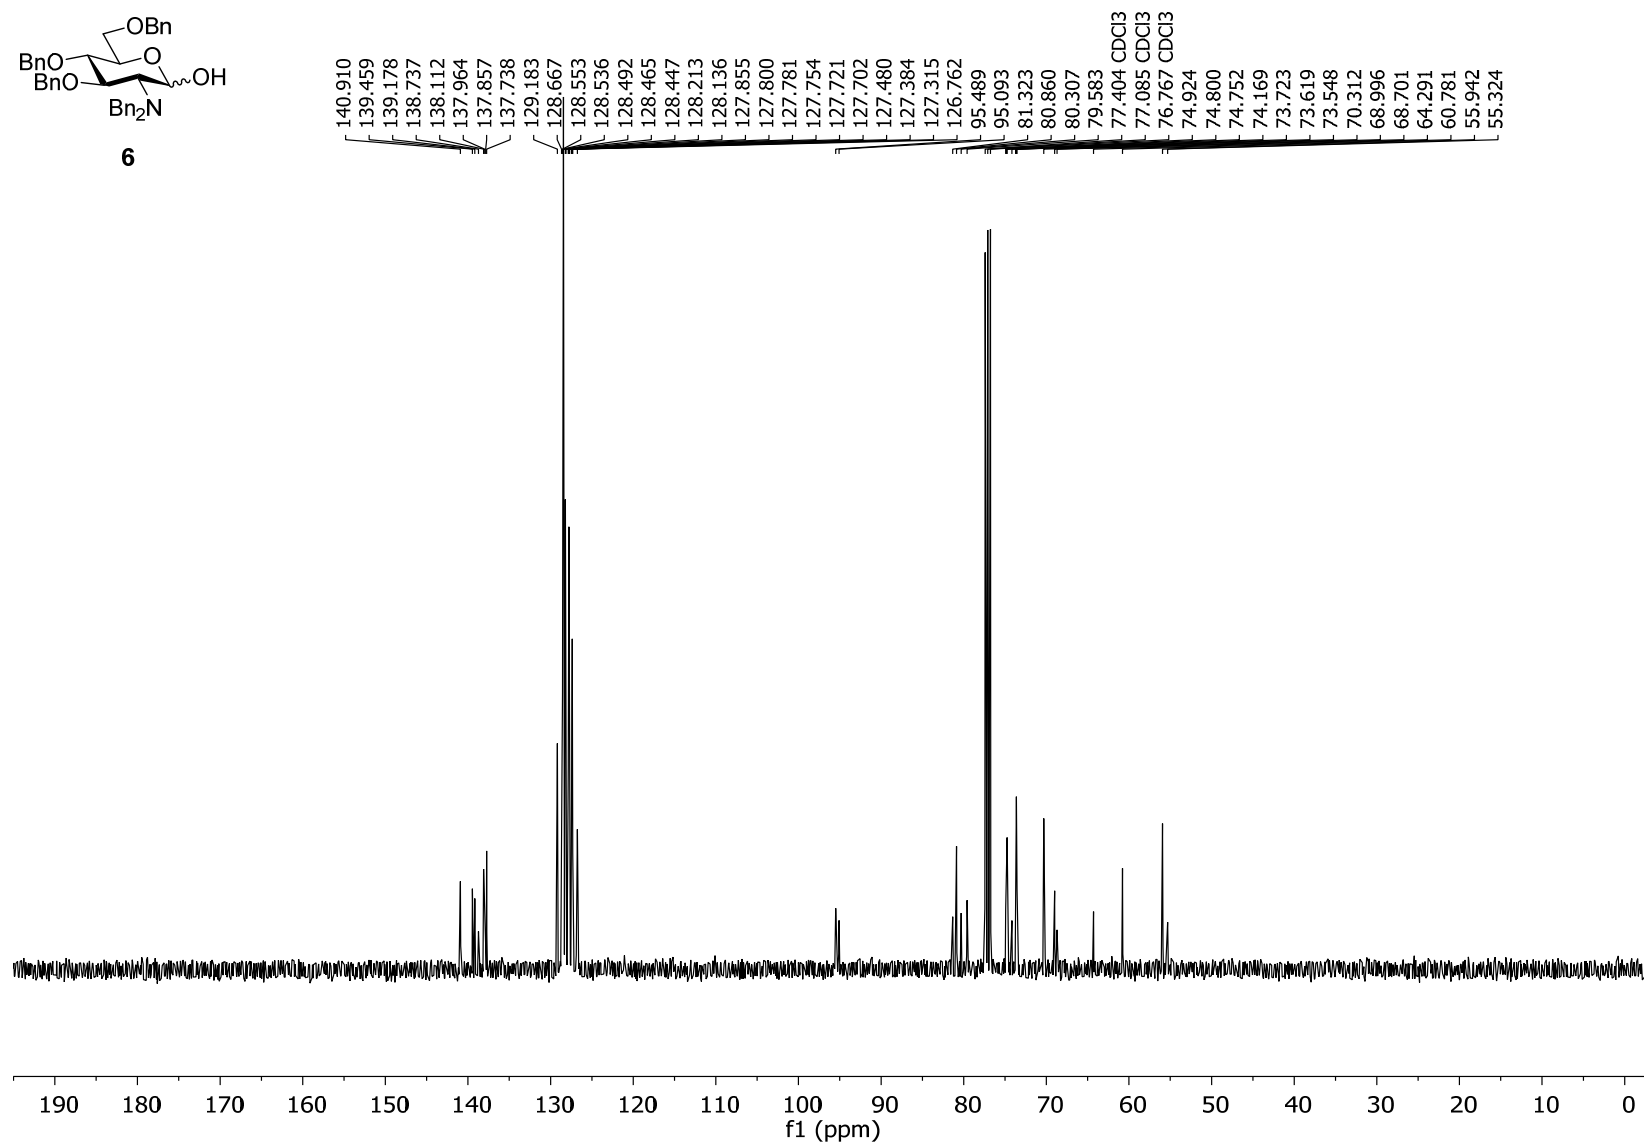

$^{13}\text{C}$  NMR spectrum (101 MHz,  $\text{CDCl}_3$ ) of **6**



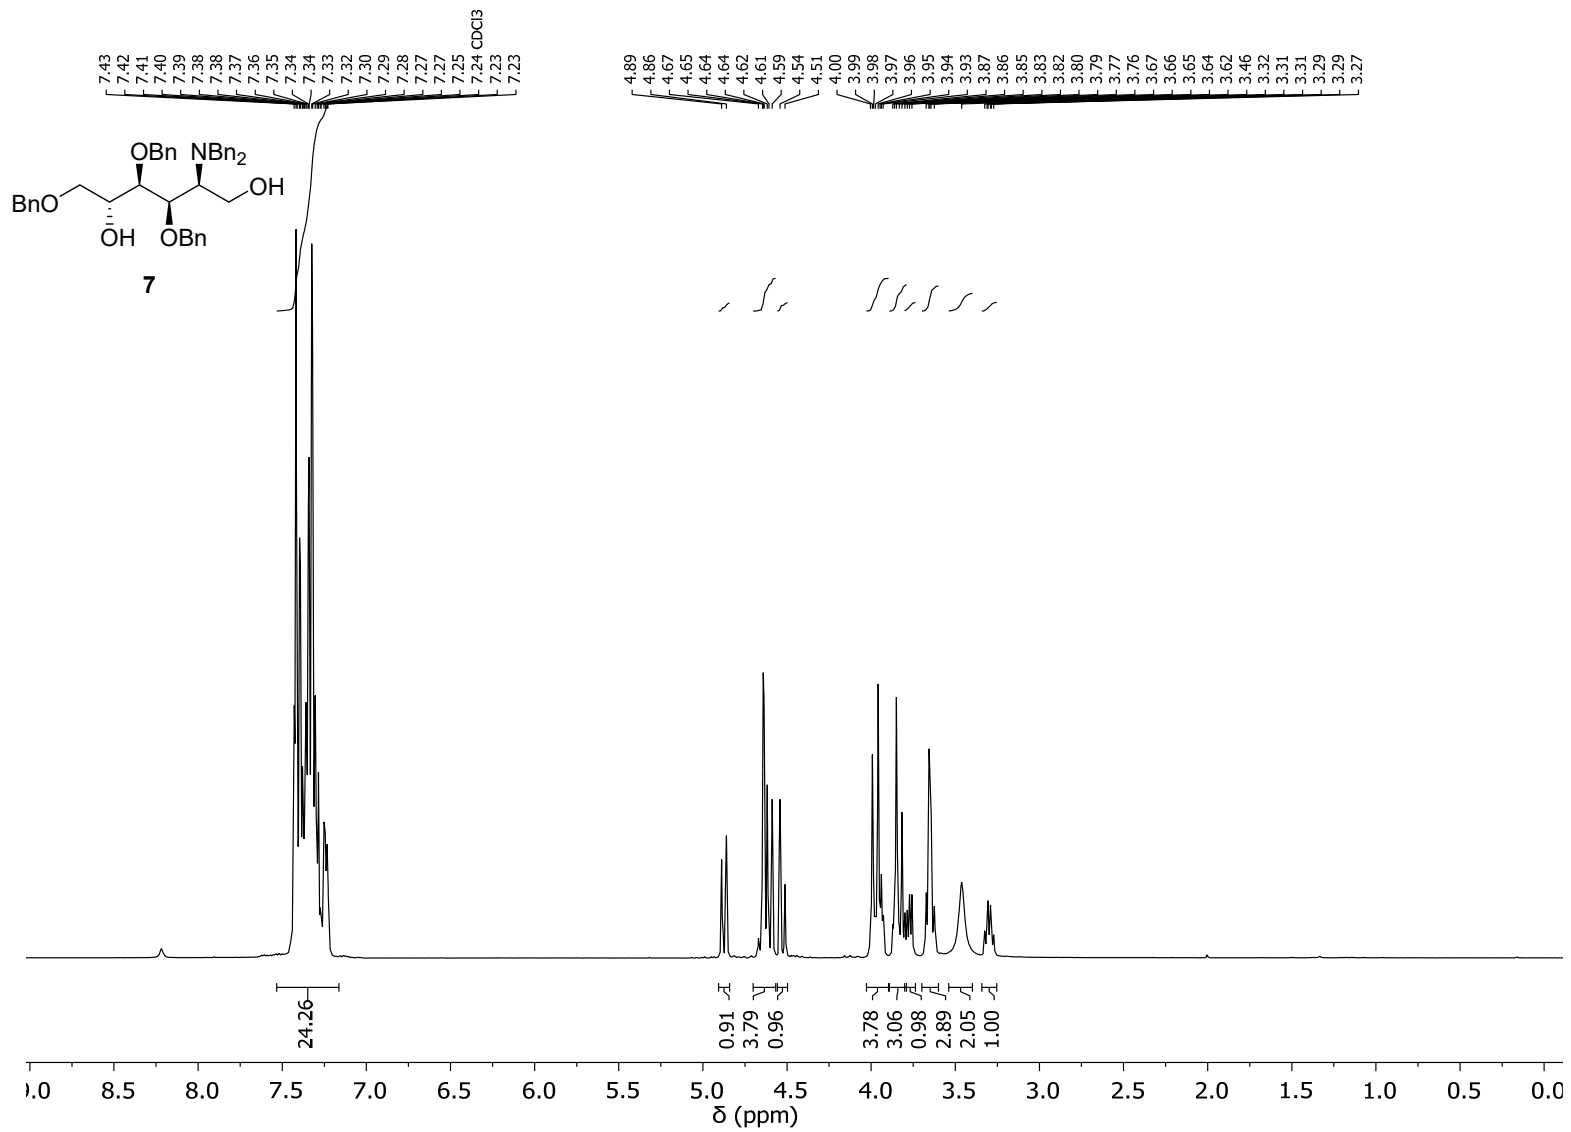

<sup>1</sup>H NMR spectrum (400 MHz, CDCl<sub>3</sub>) of **7**

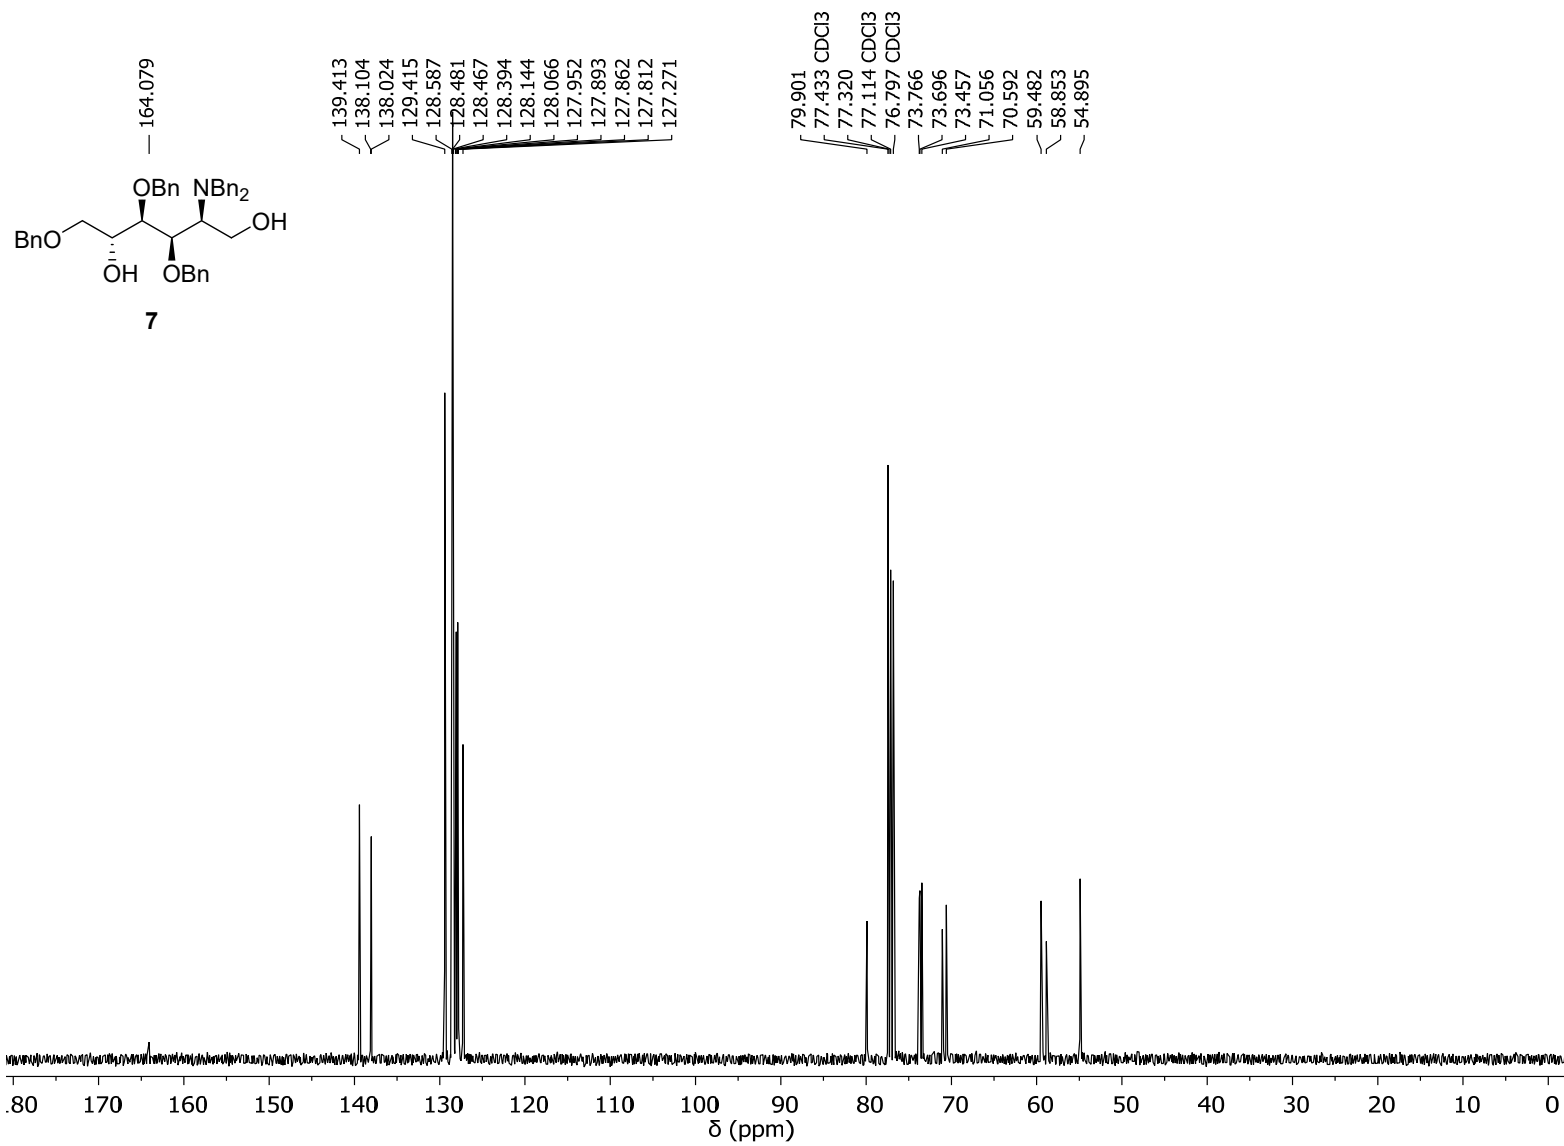

<sup>13</sup>C NMR spectrum (101 MHz, CDCl<sub>3</sub>) of **7**

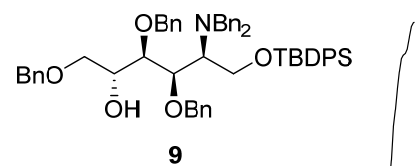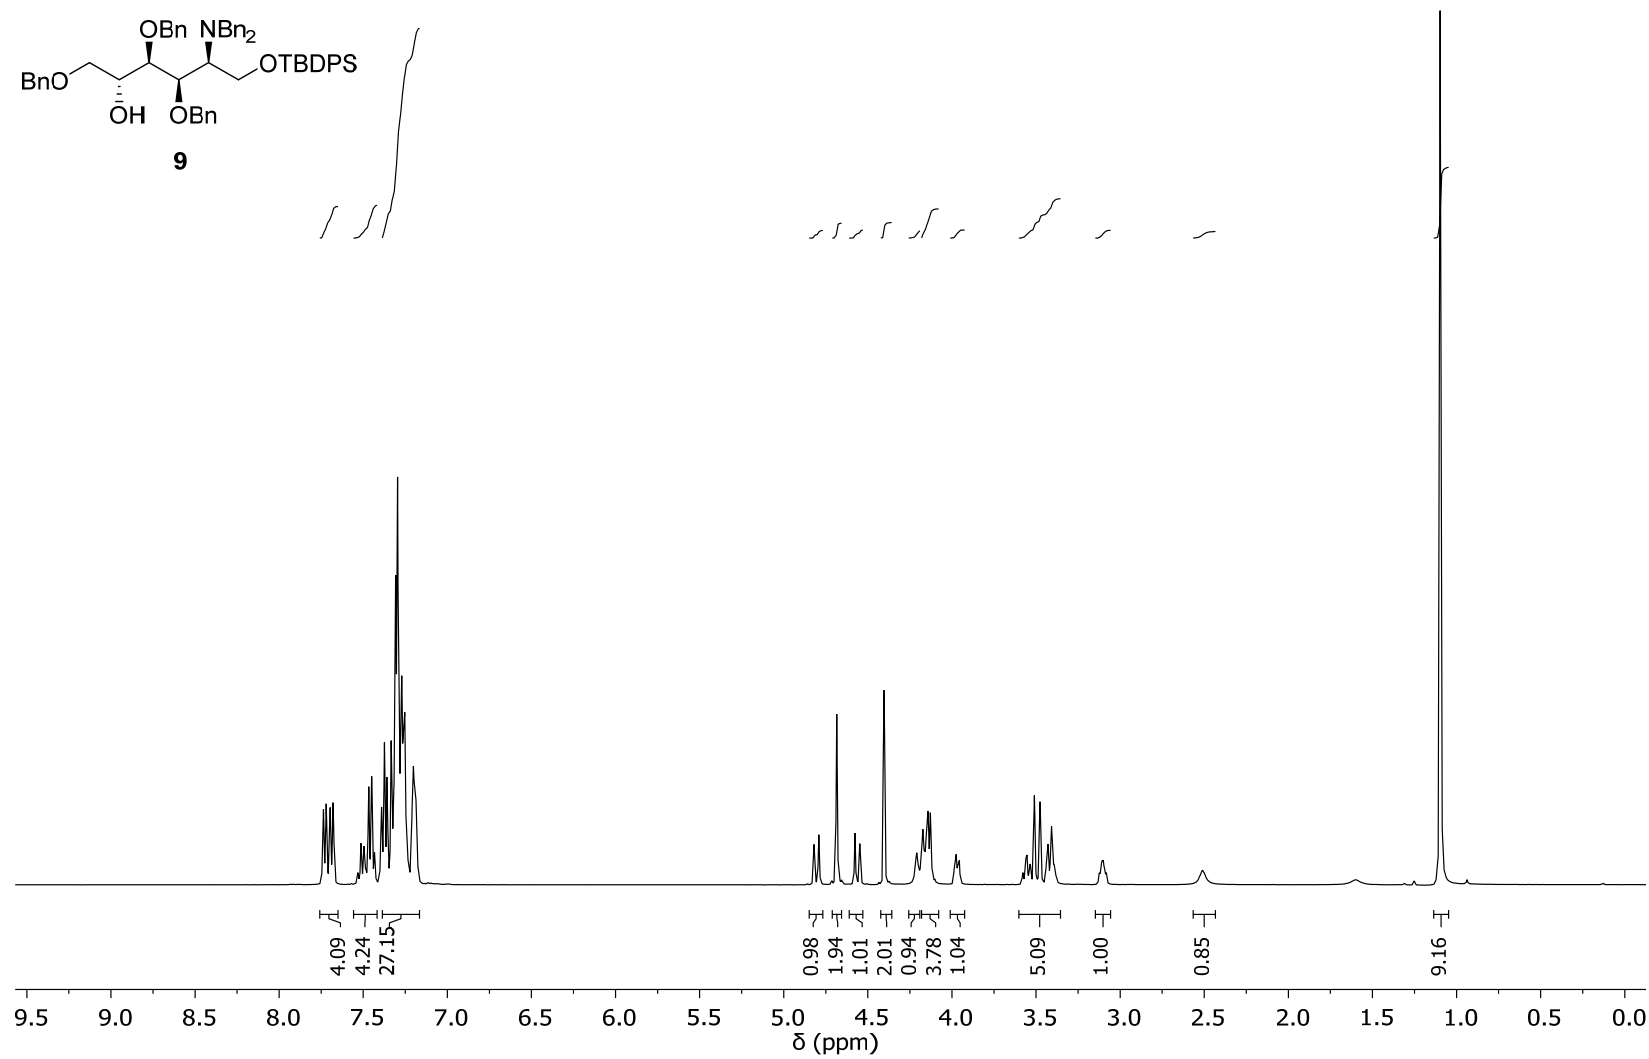

$^1\text{H}$  NMR spectrum (400 MHz,  $\text{CDCl}_3$ ) of **9**

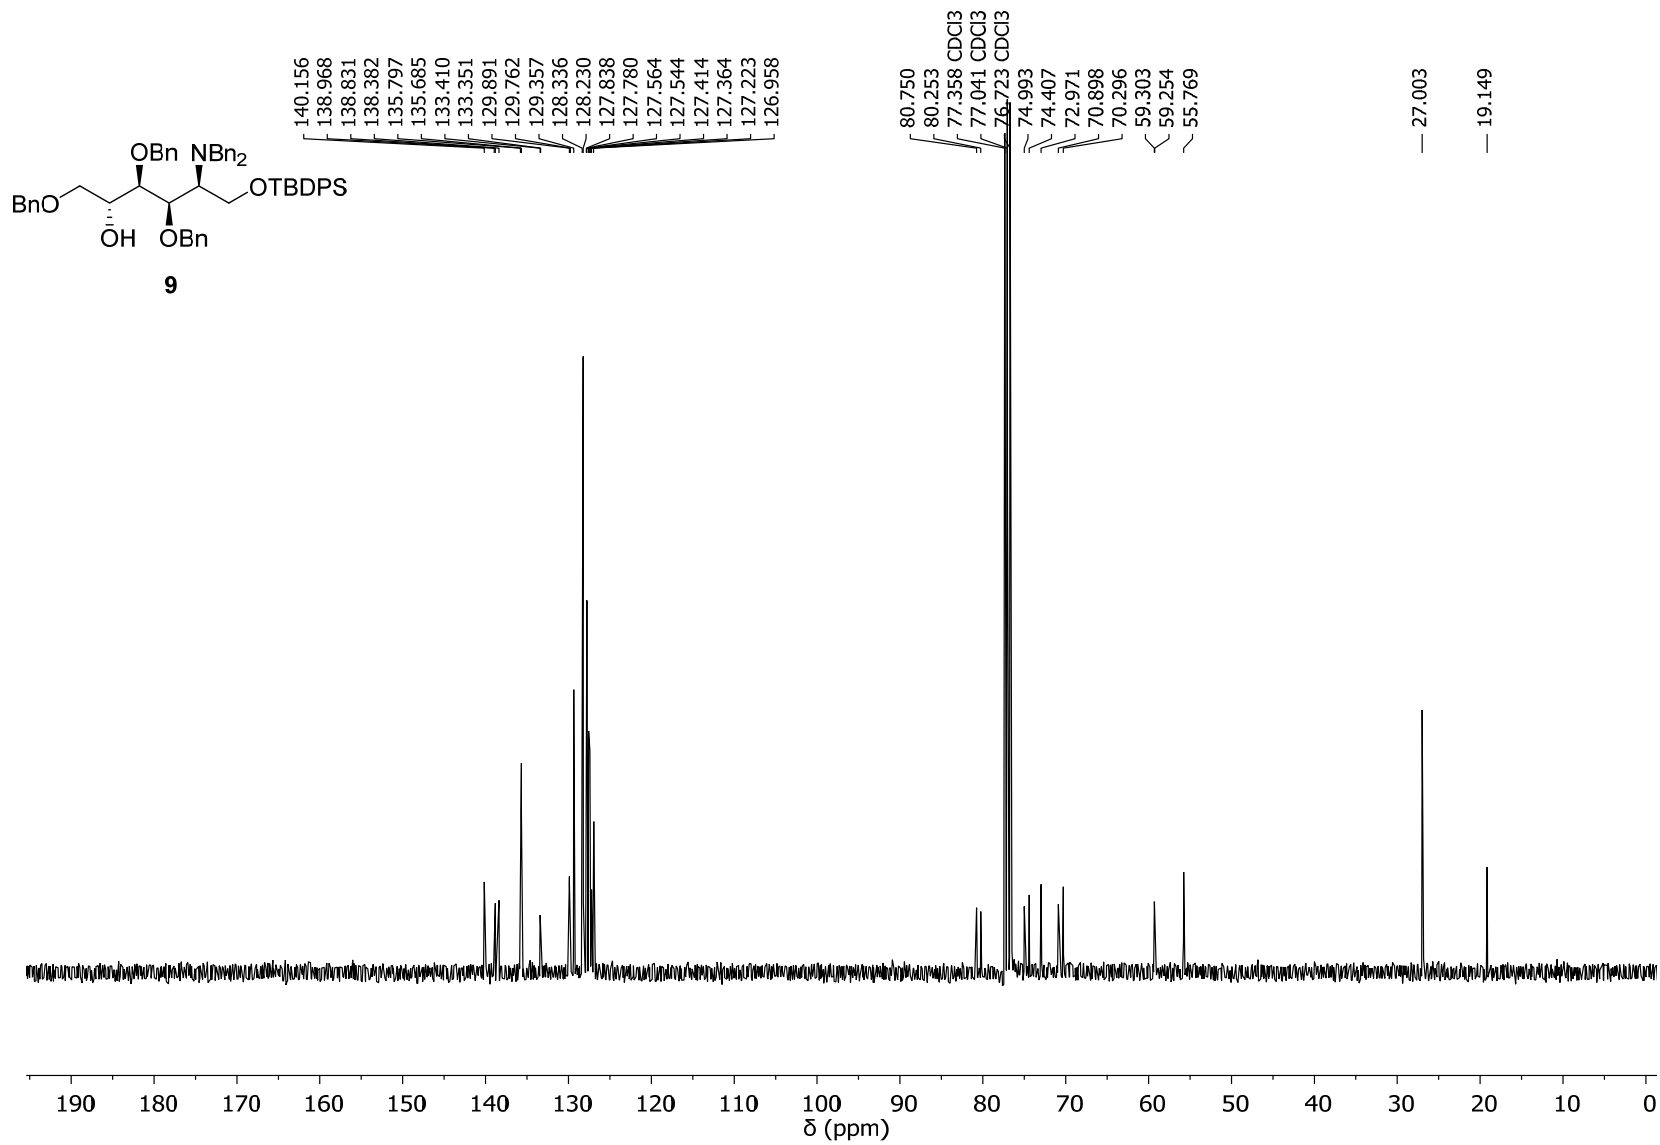

<sup>13</sup>C NMR spectrum (101 MHz, CDCl<sub>3</sub>) of **9**

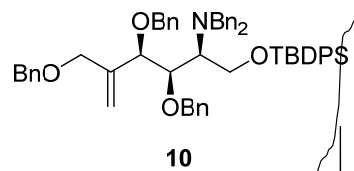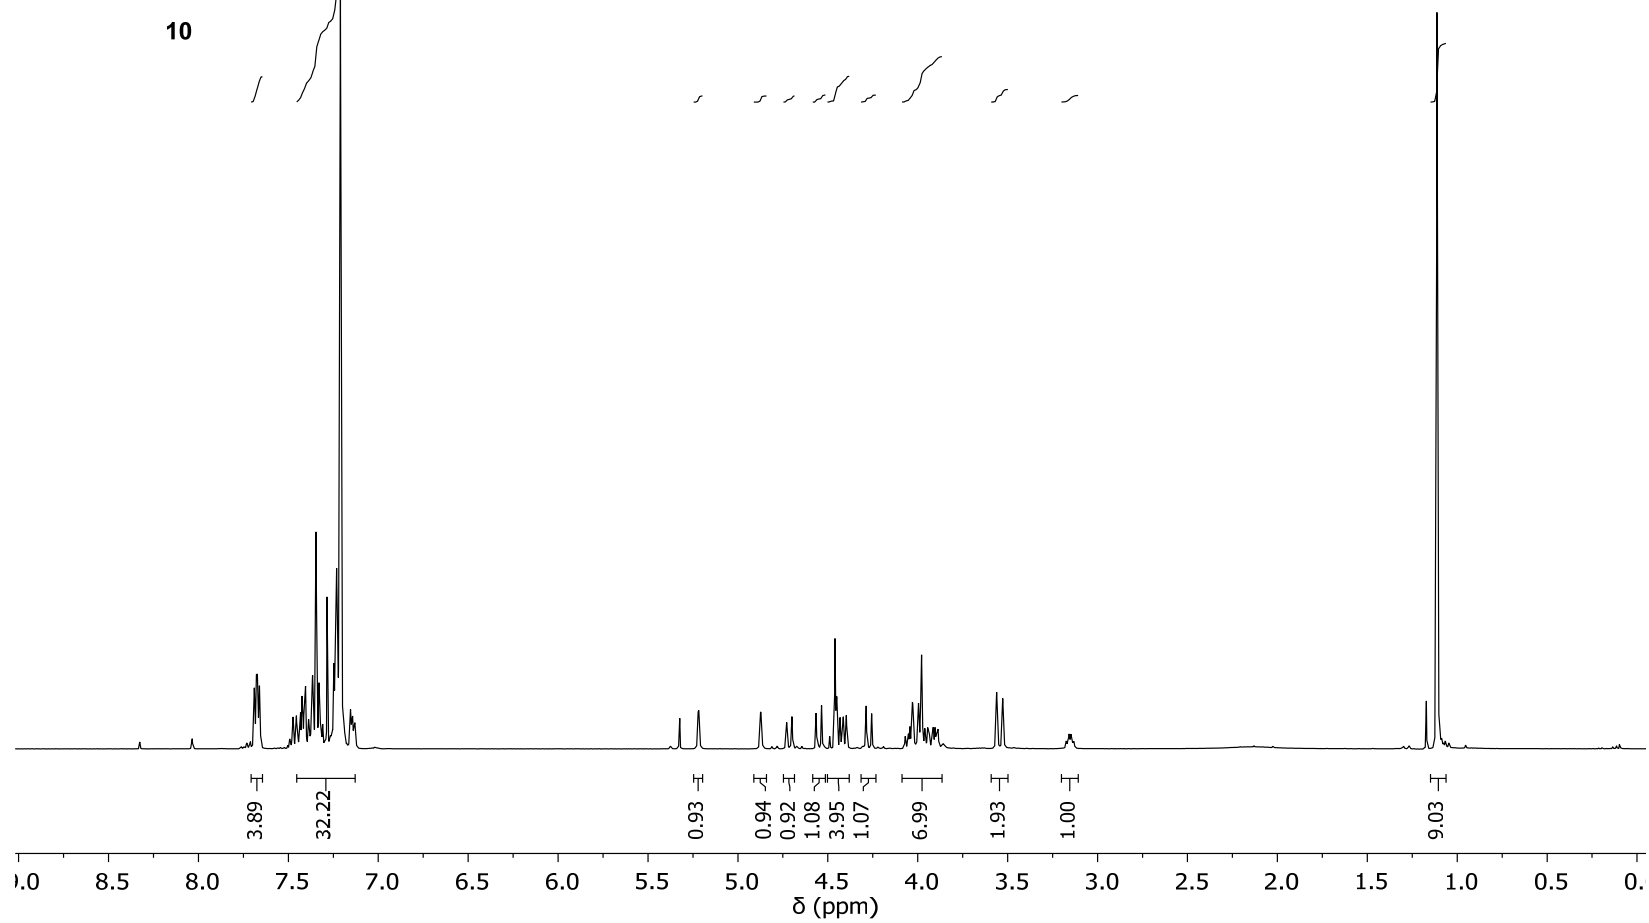

$^1\text{H}$  NMR spectrum (400 MHz,  $\text{CDCl}_3$ ) of **10**

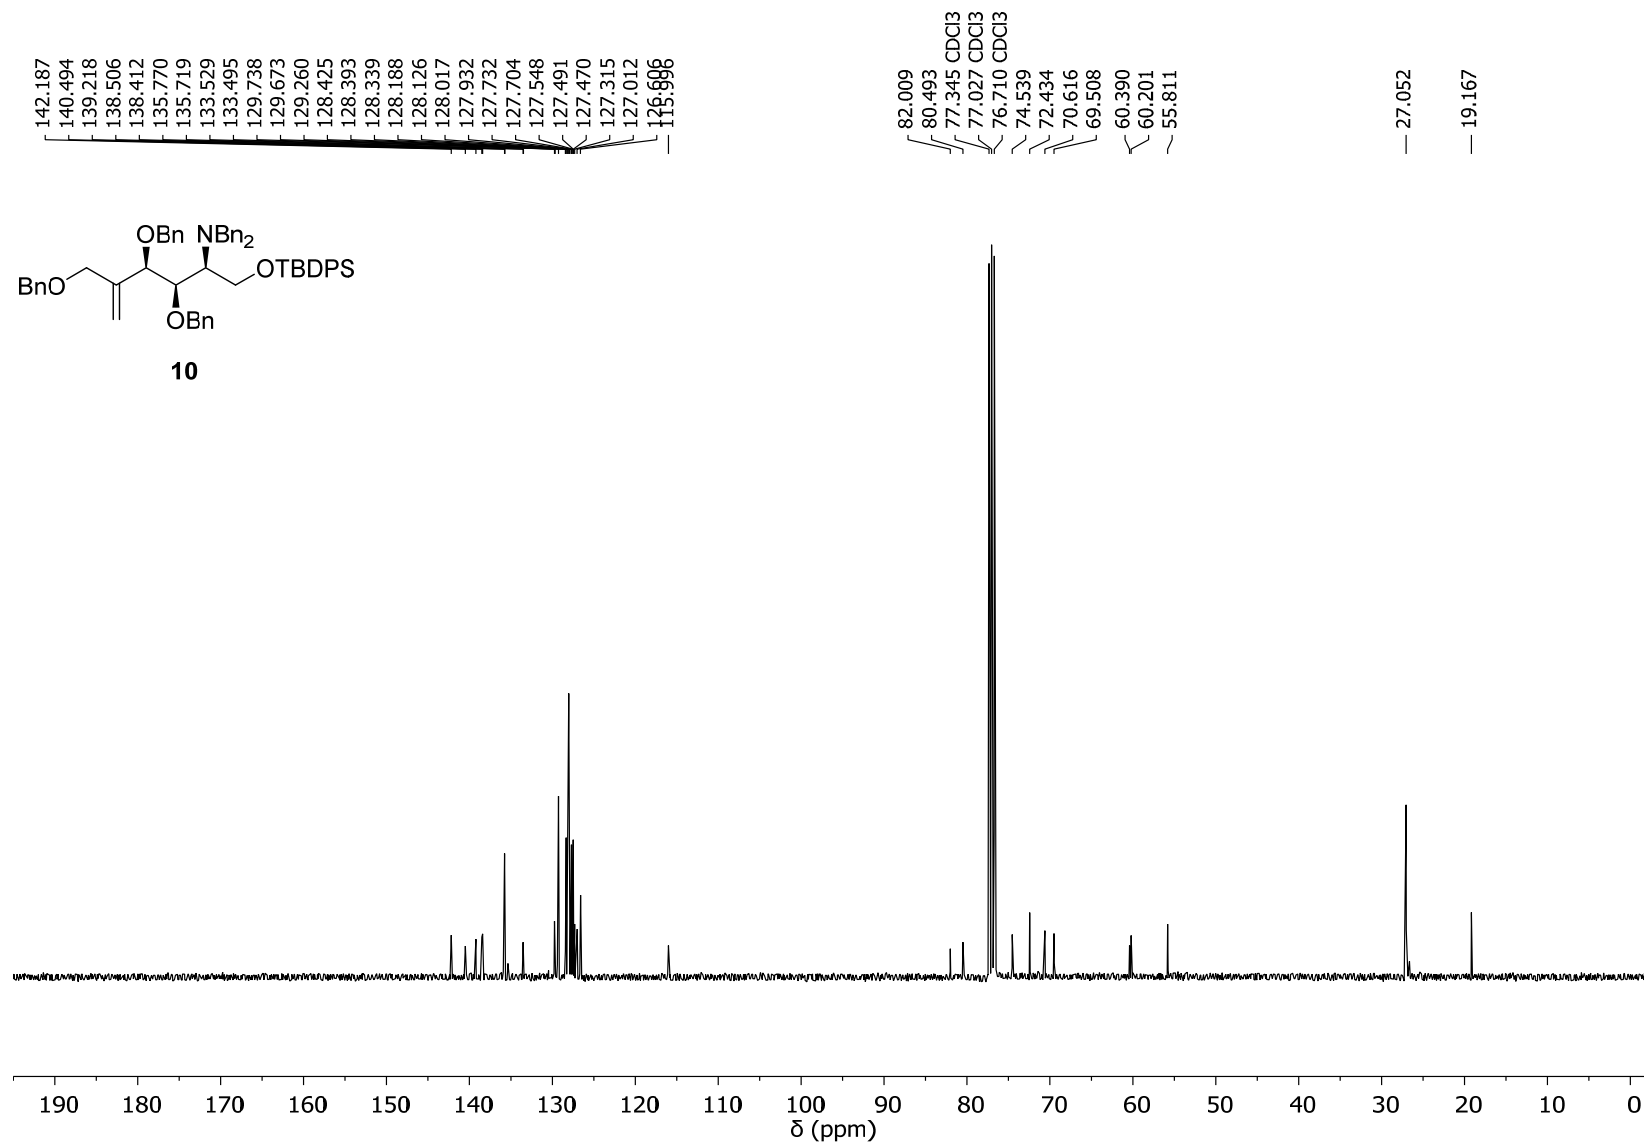

<sup>13</sup>C NMR spectrum (101 MHz, CDCl<sub>3</sub>) of **10**

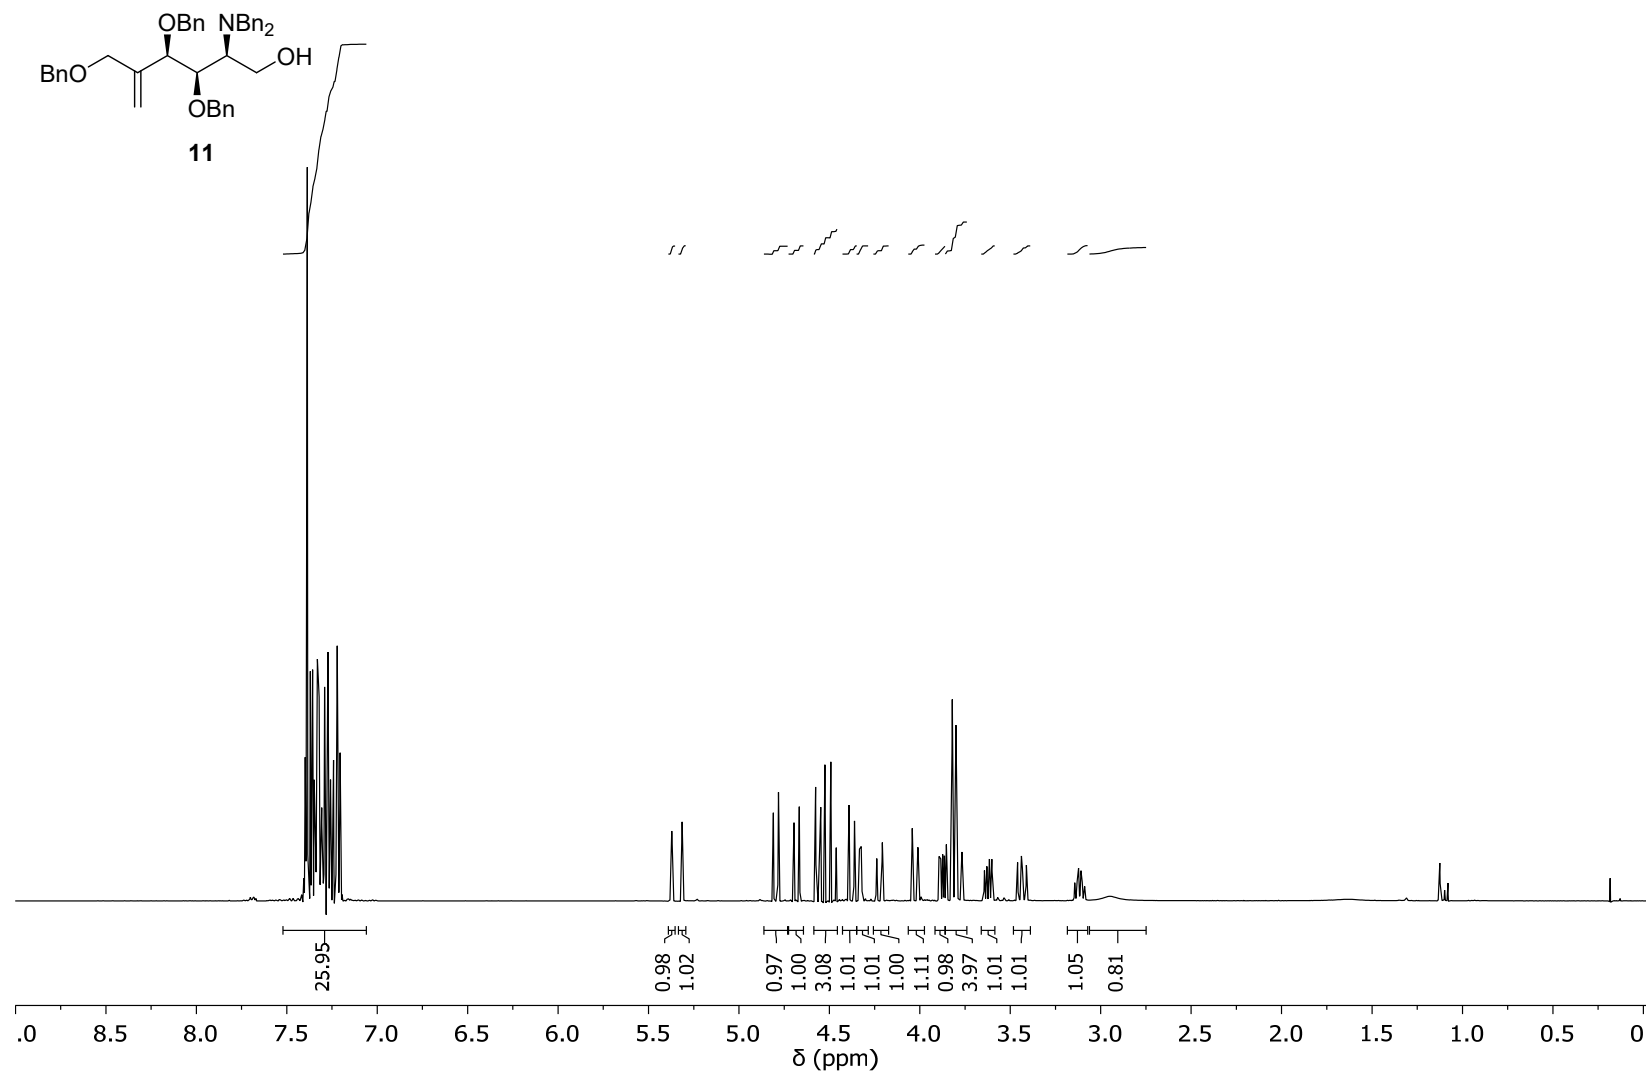

<sup>1</sup>H NMR spectrum (400 MHz, CDCl<sub>3</sub>) of **11**

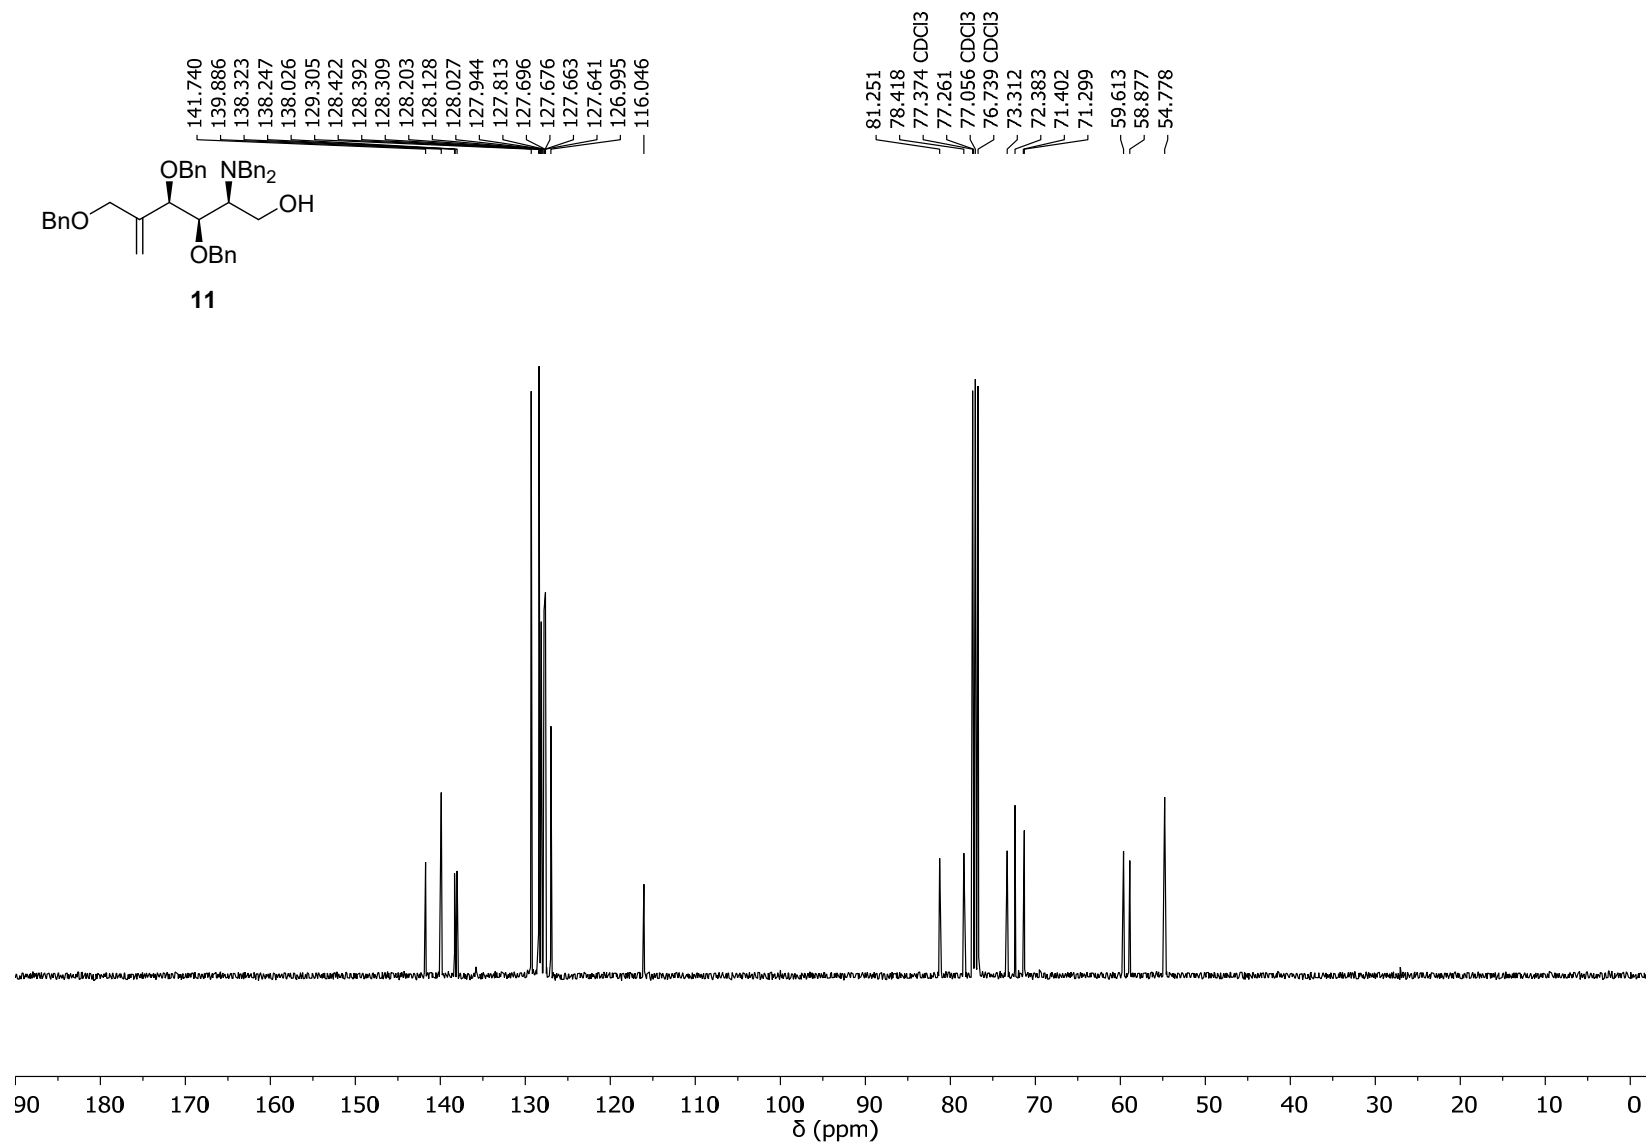

$^{13}\text{C}$  NMR spectrum (101 MHz,  $\text{CDCl}_3$ ) of **11**



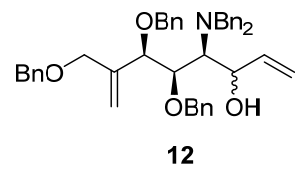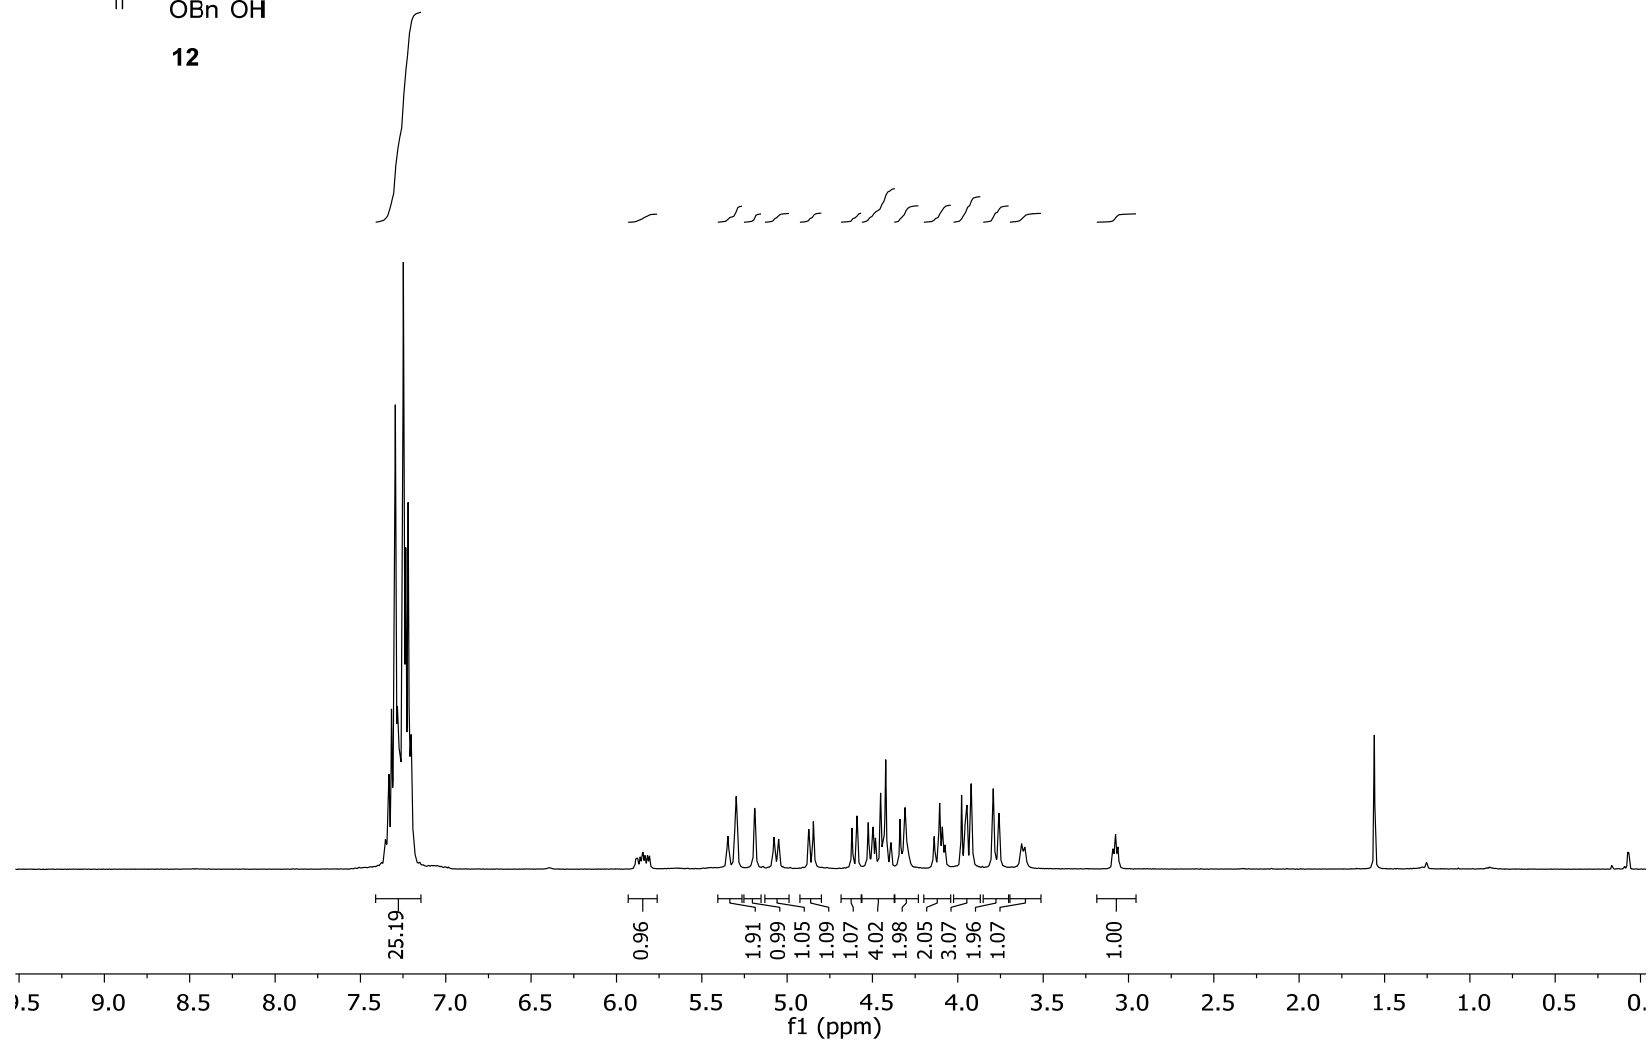

<sup>1</sup>H NMR spectrum (400 MHz, CDCl<sub>3</sub>) of **12** (isomer 1)

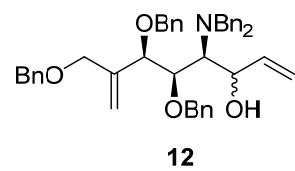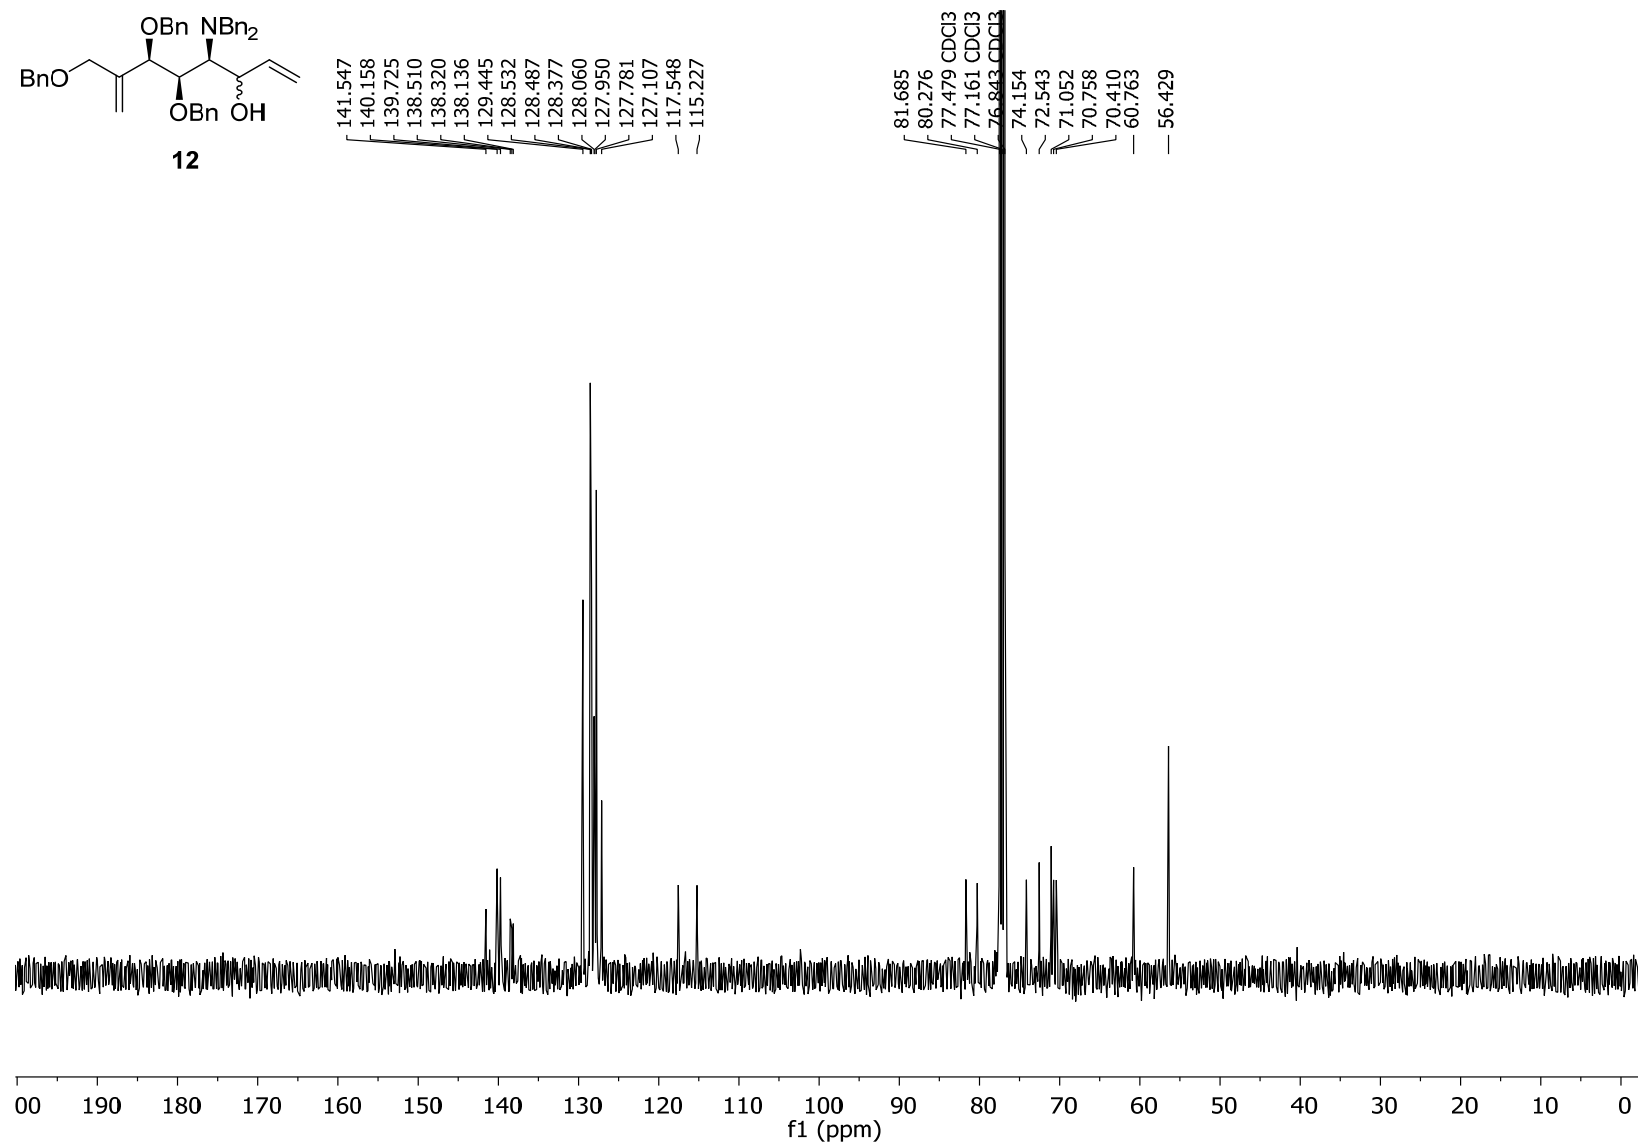

$^{13}\text{C}$  NMR spectrum (101 MHz,  $\text{CDCl}_3$ ) of **12** (isomer 1)

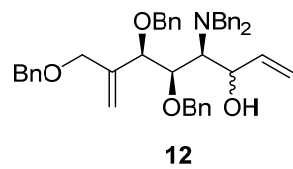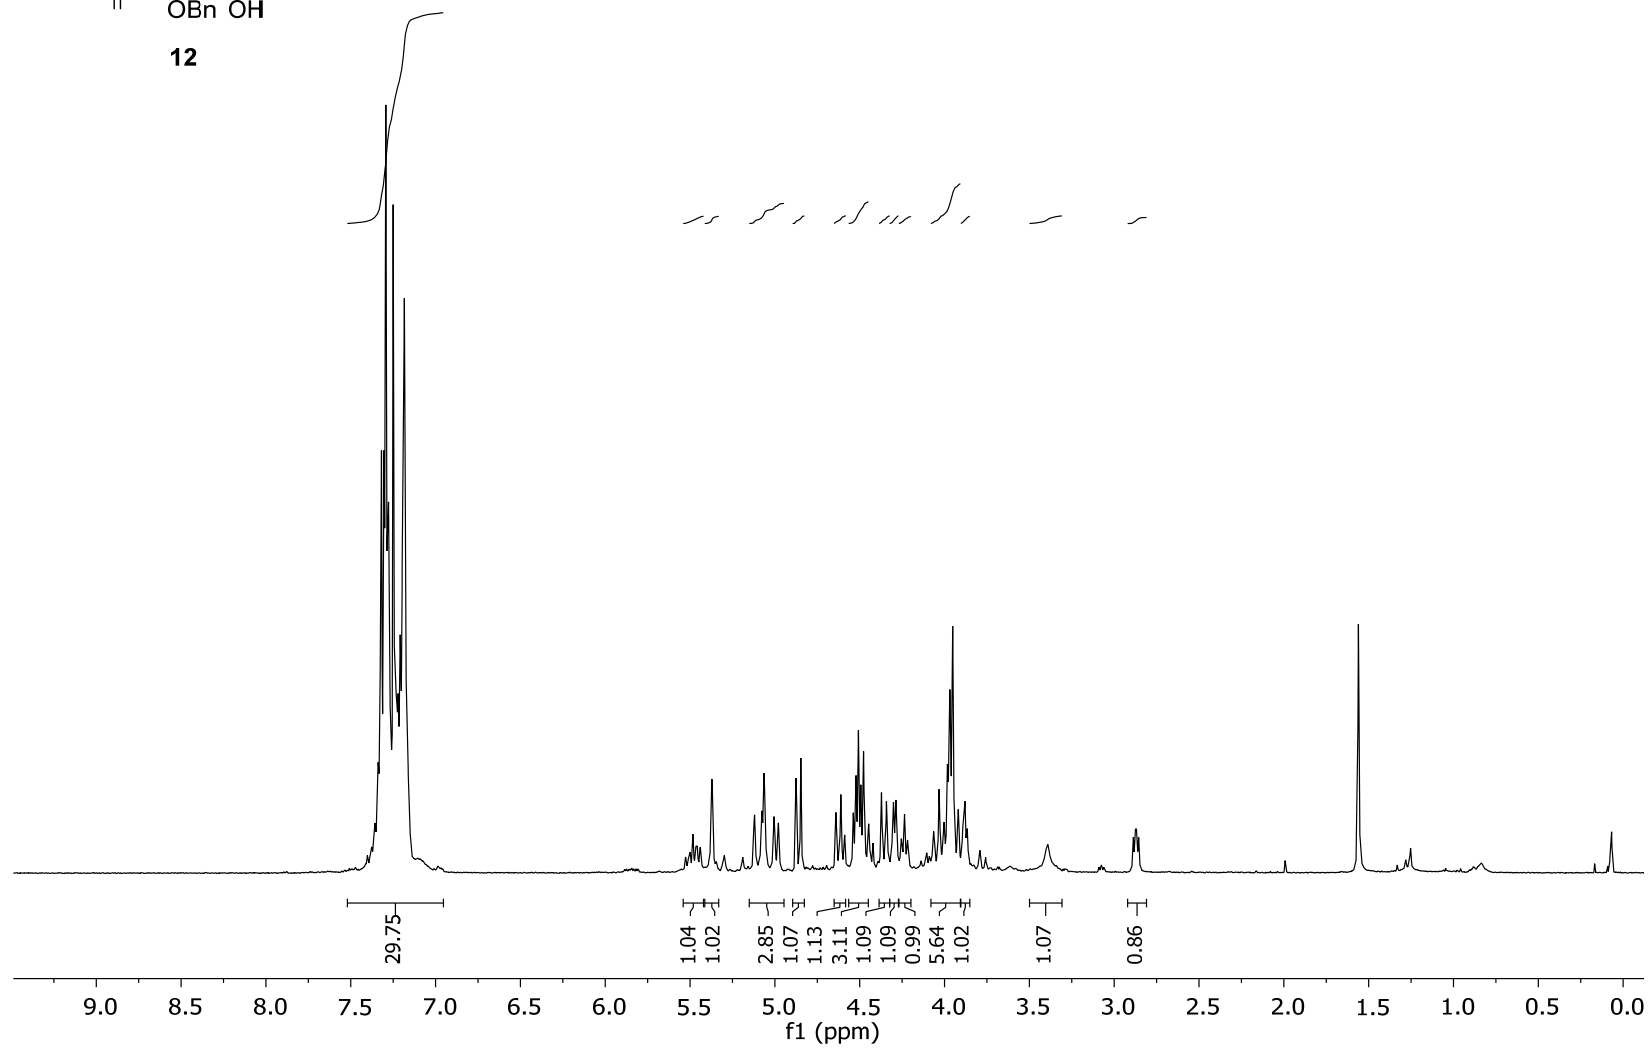

<sup>1</sup>H NMR spectrum (400 MHz, CDCl<sub>3</sub>) of **12** (isomer 2)

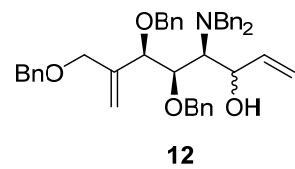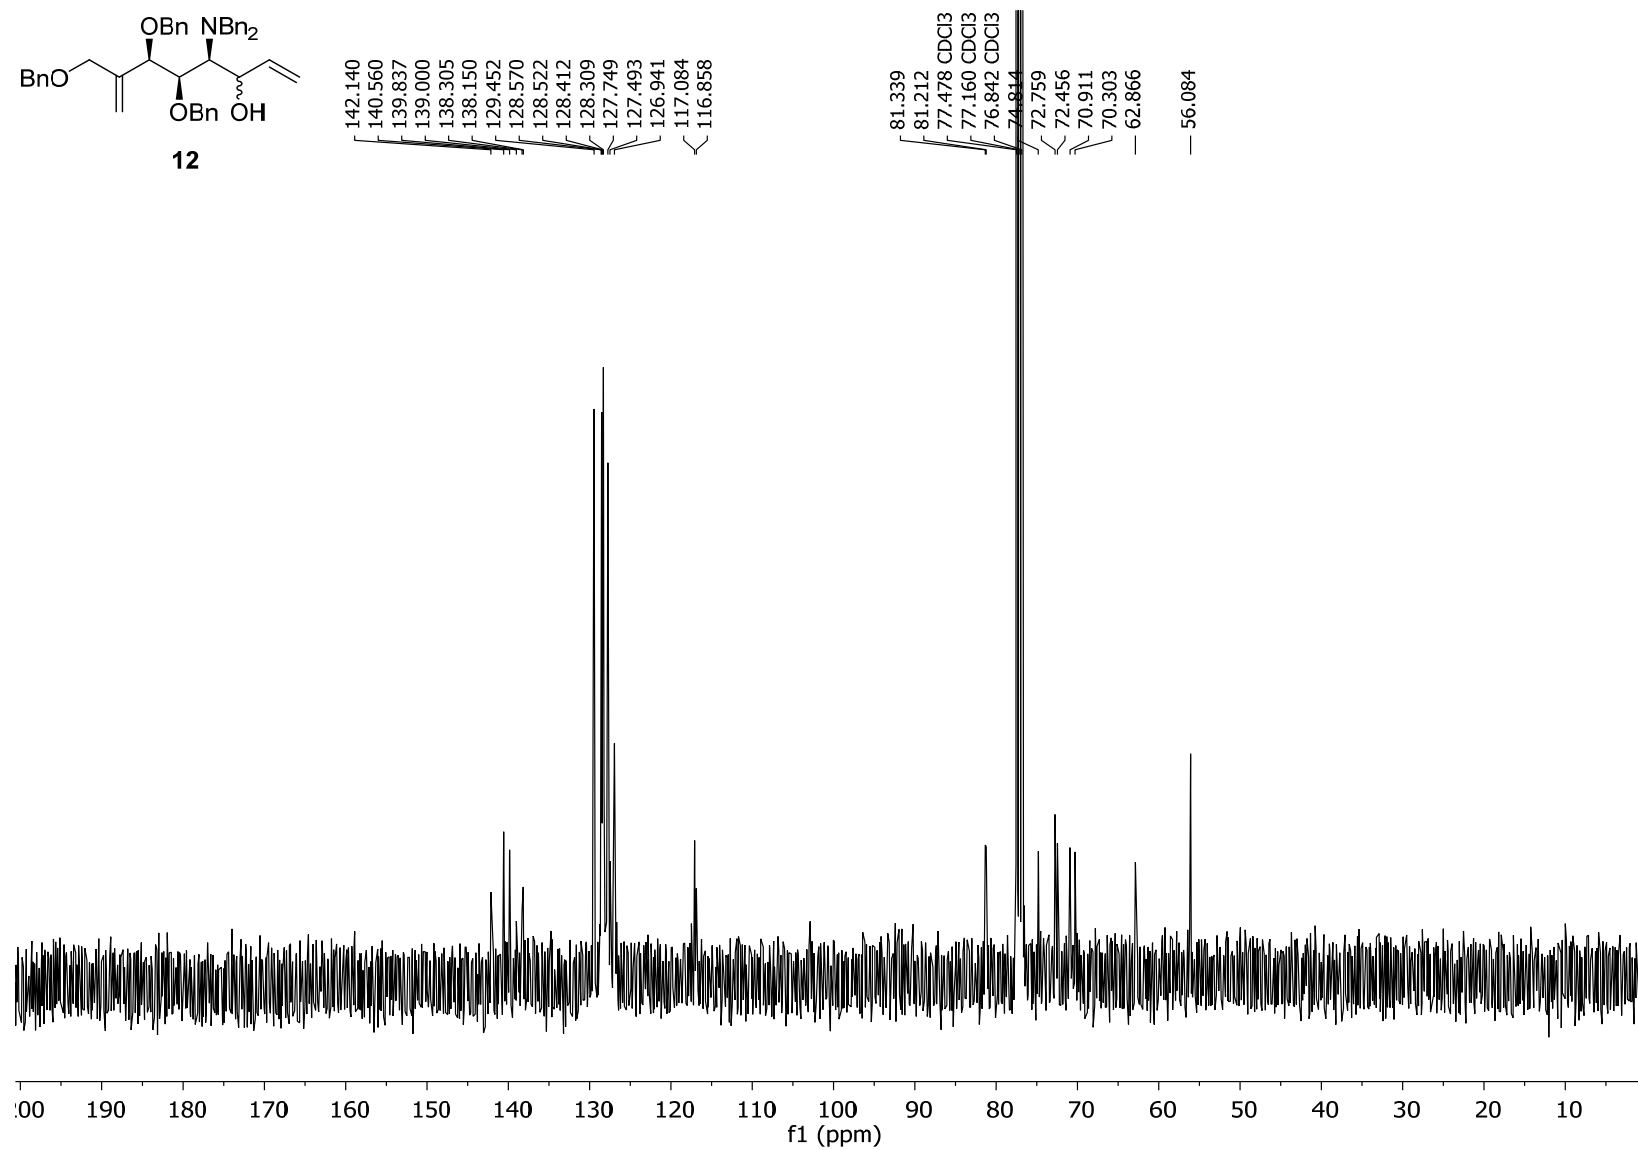

<sup>13</sup>C NMR spectrum (101 MHz, CDCl<sub>3</sub>) of **12** (isomer 2)

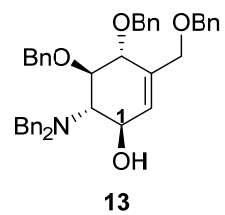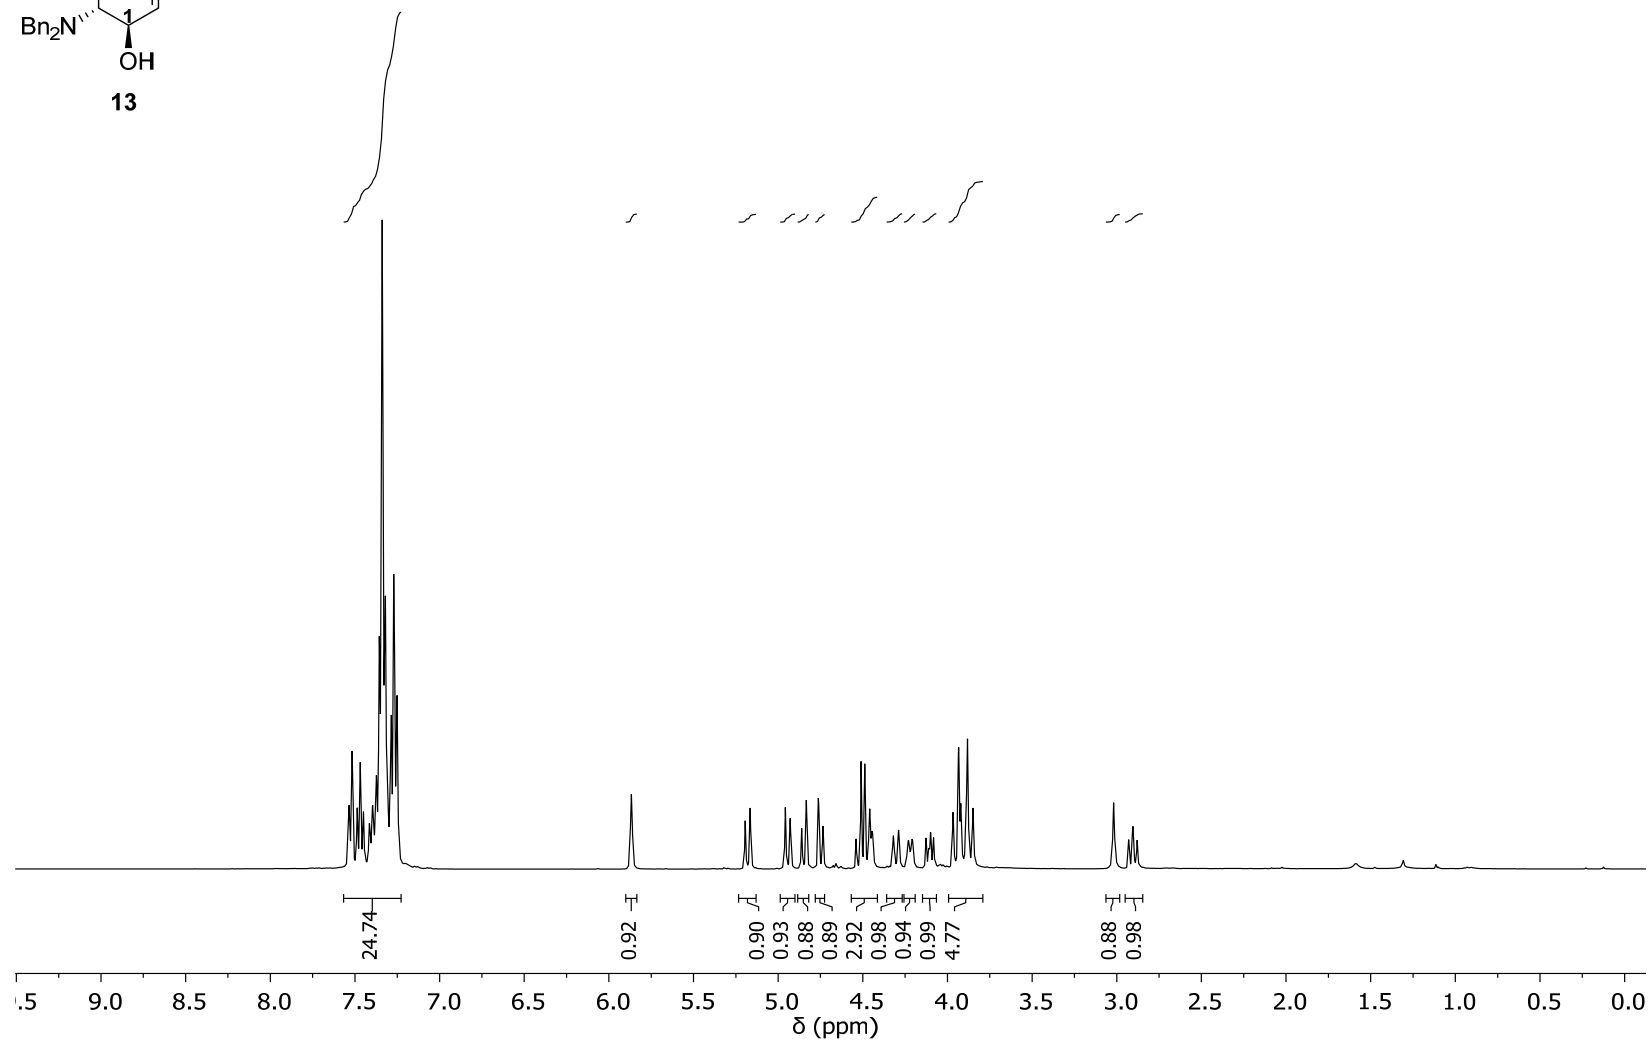

$^1\text{H}$  NMR spectrum (400 MHz,  $\text{CDCl}_3$ ) of **13**

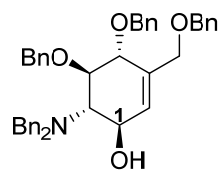

**13**

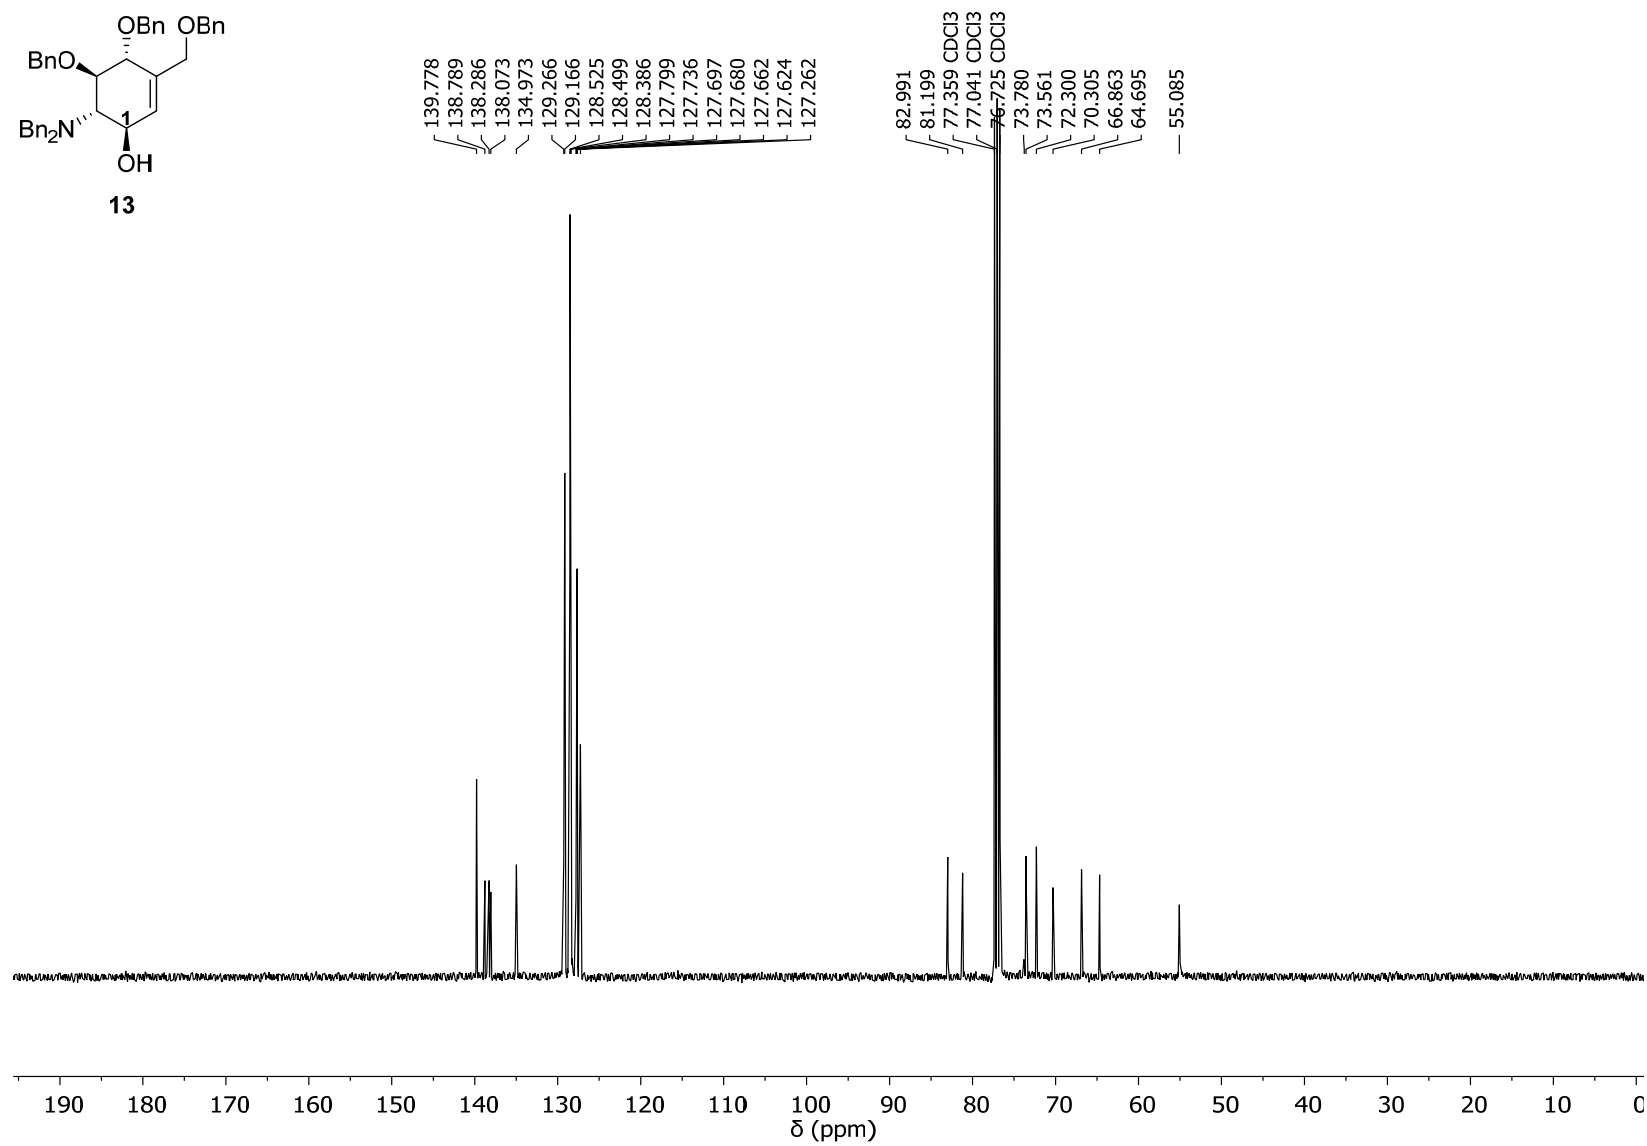

<sup>13</sup>C NMR spectrum (101 MHz, CDCl<sub>3</sub>) of **13**

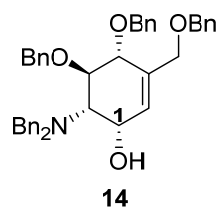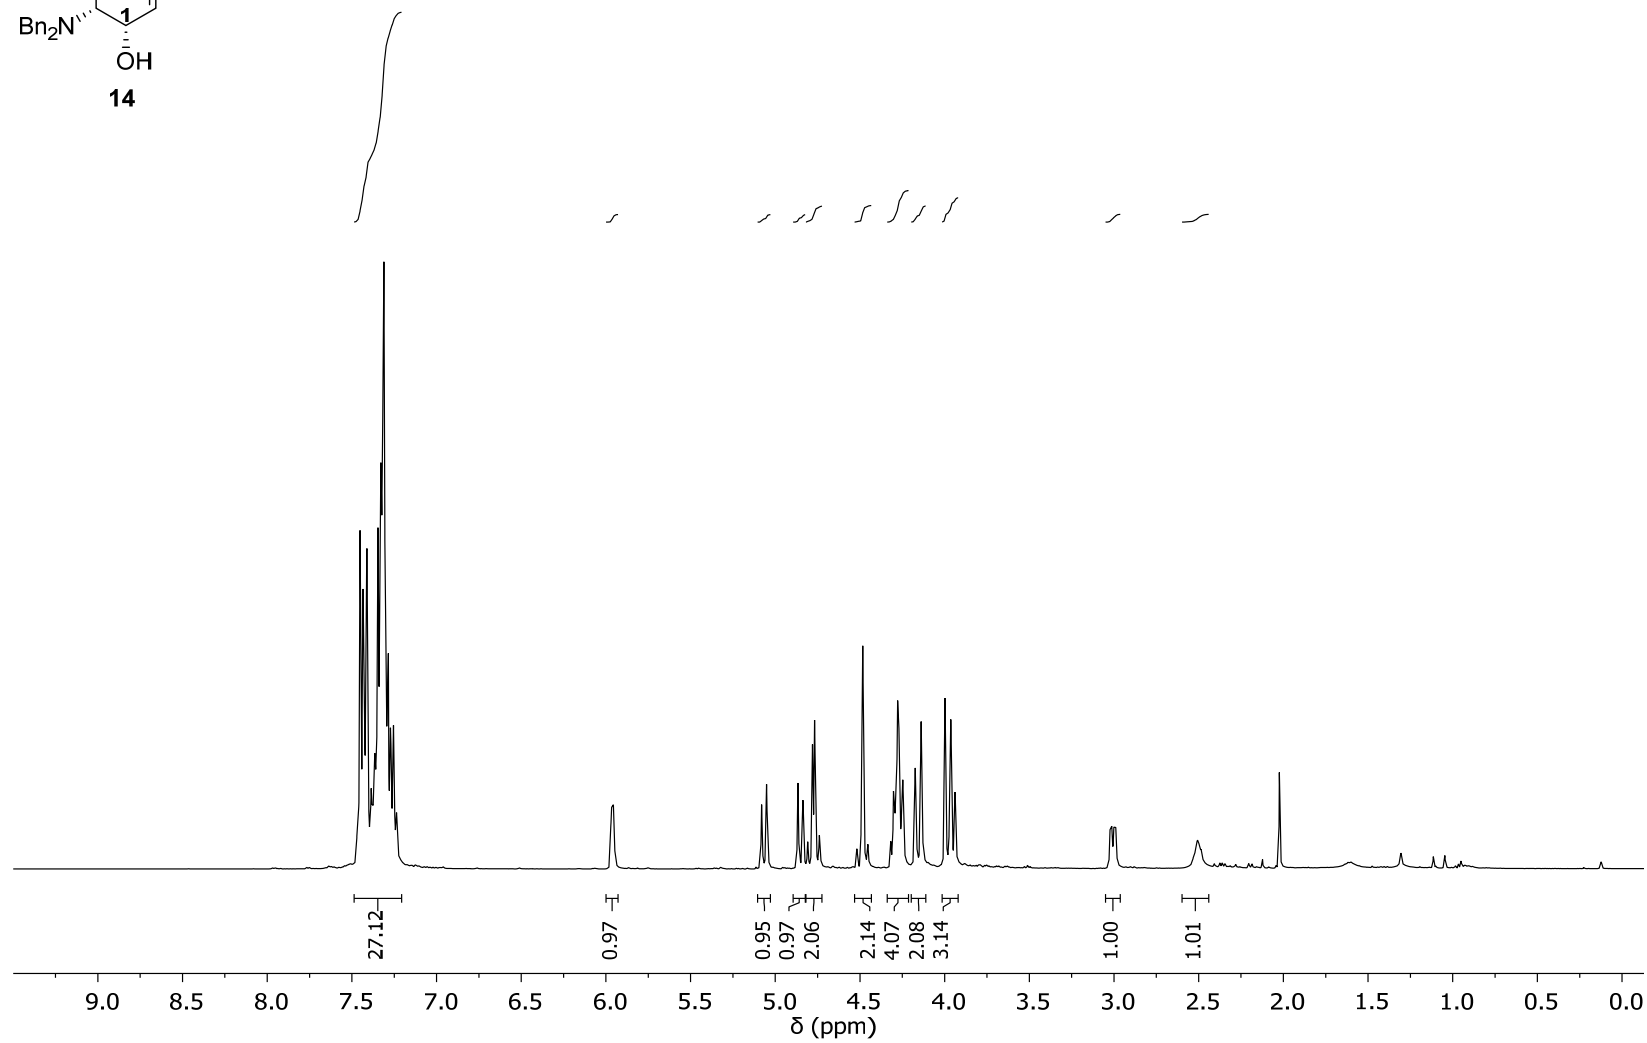

$^1\text{H}$  NMR spectrum (400 MHz,  $\text{CDCl}_3$ ) of **14**

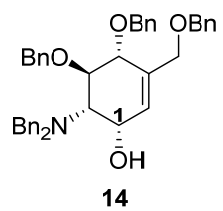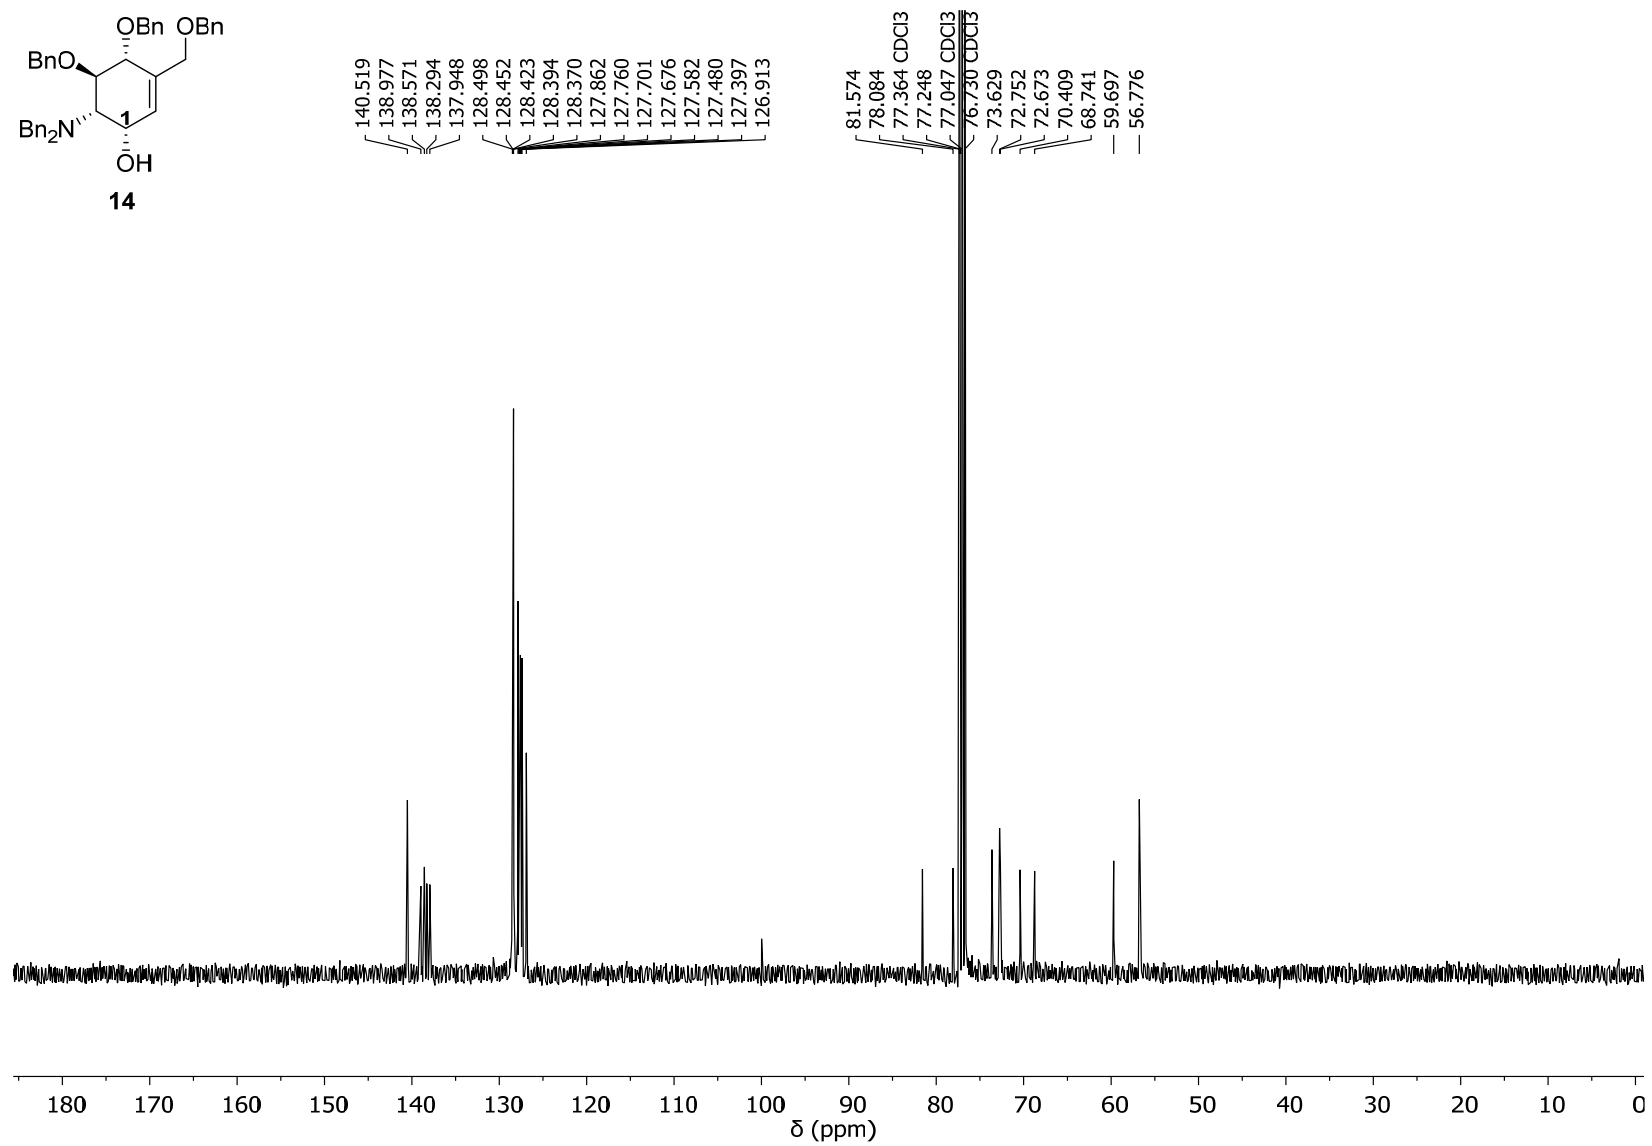

$^{13}\text{C}$  NMR spectrum (101 MHz,  $\text{CDCl}_3$ ) of **14**



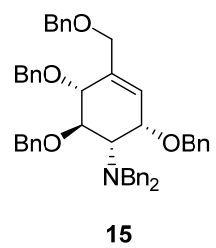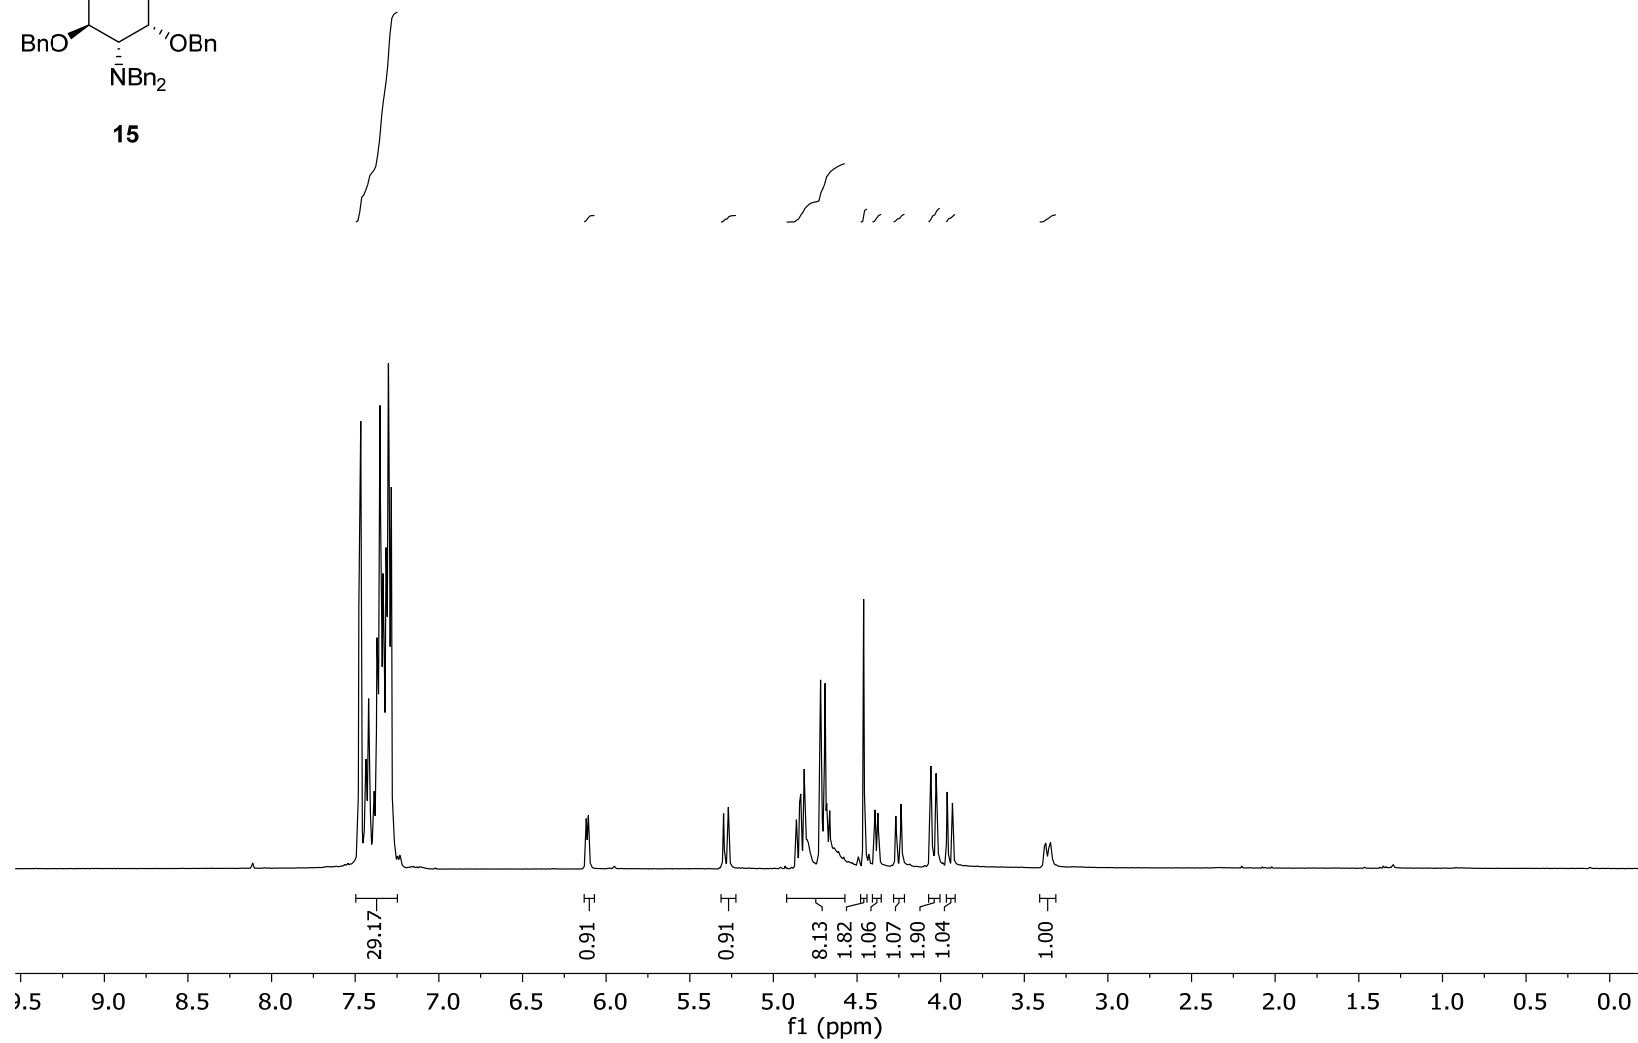

$^1\text{H}$  NMR spectrum (400 MHz,  $\text{CDCl}_3$ ) of **15**

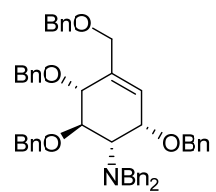

**15**

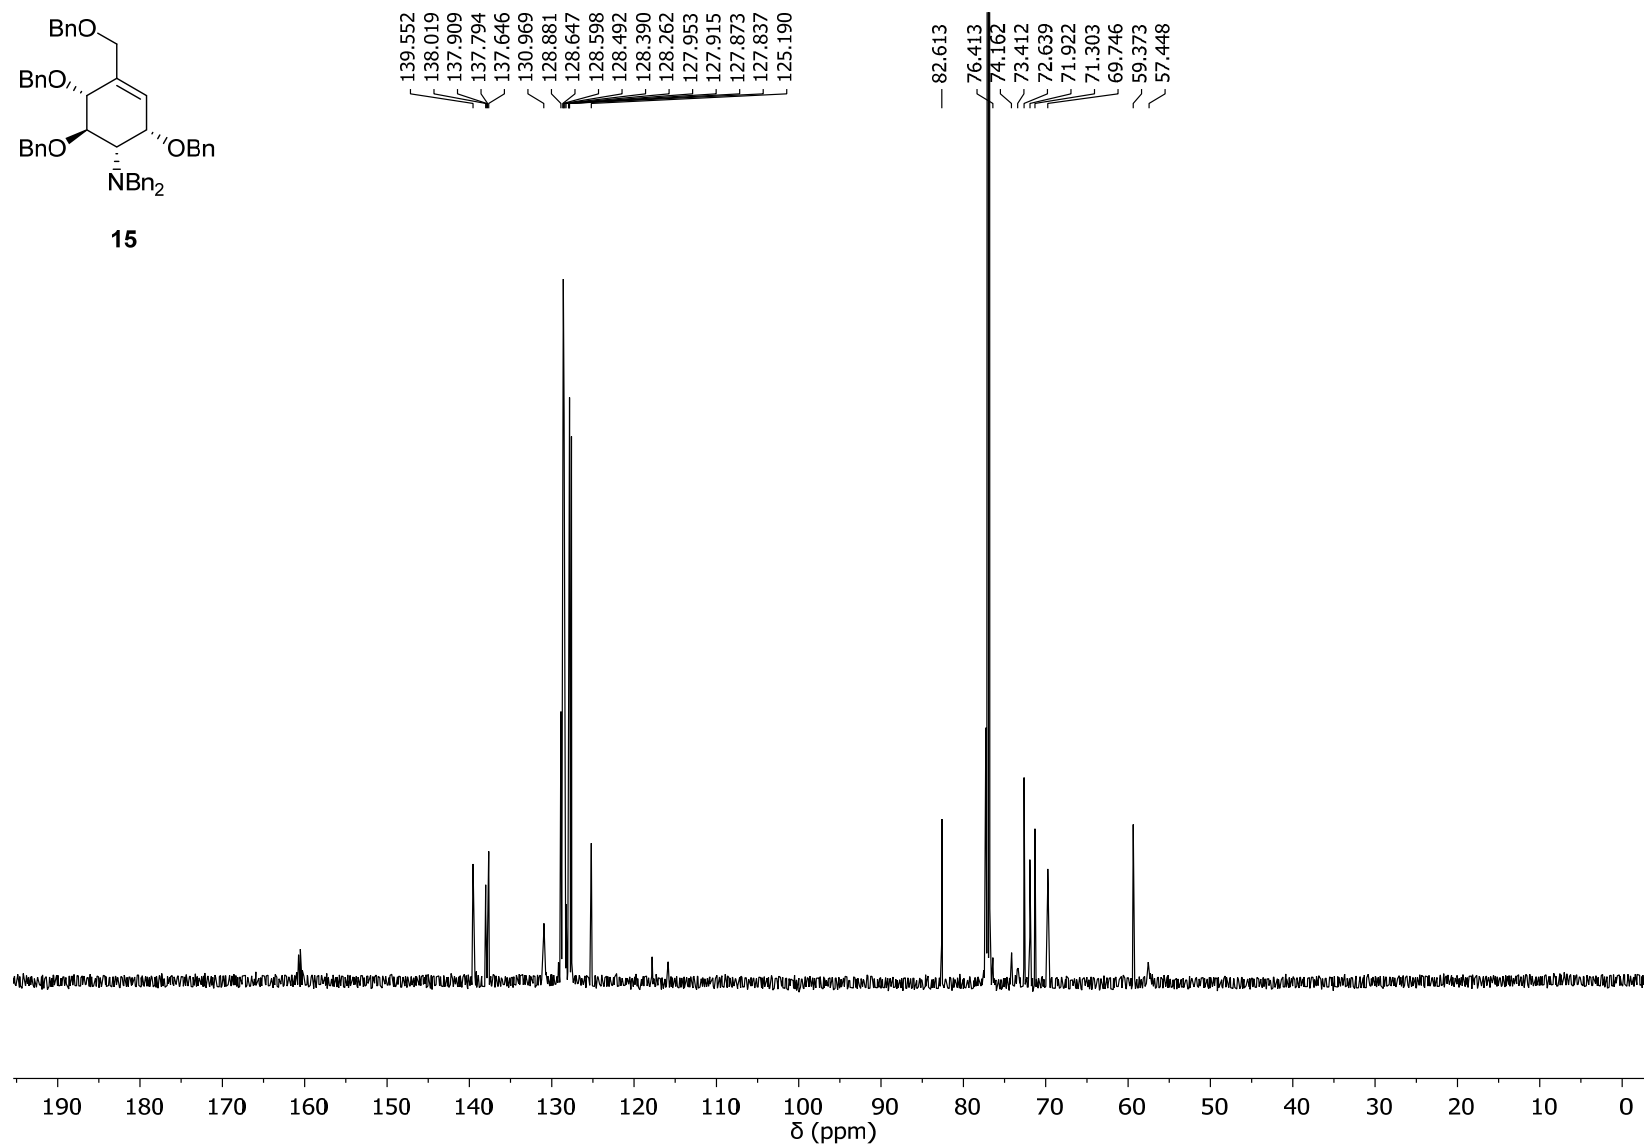

<sup>13</sup>C NMR spectrum (101 MHz, CDCl<sub>3</sub>) of **15**

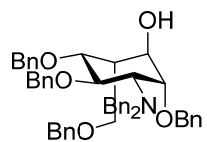

**16**

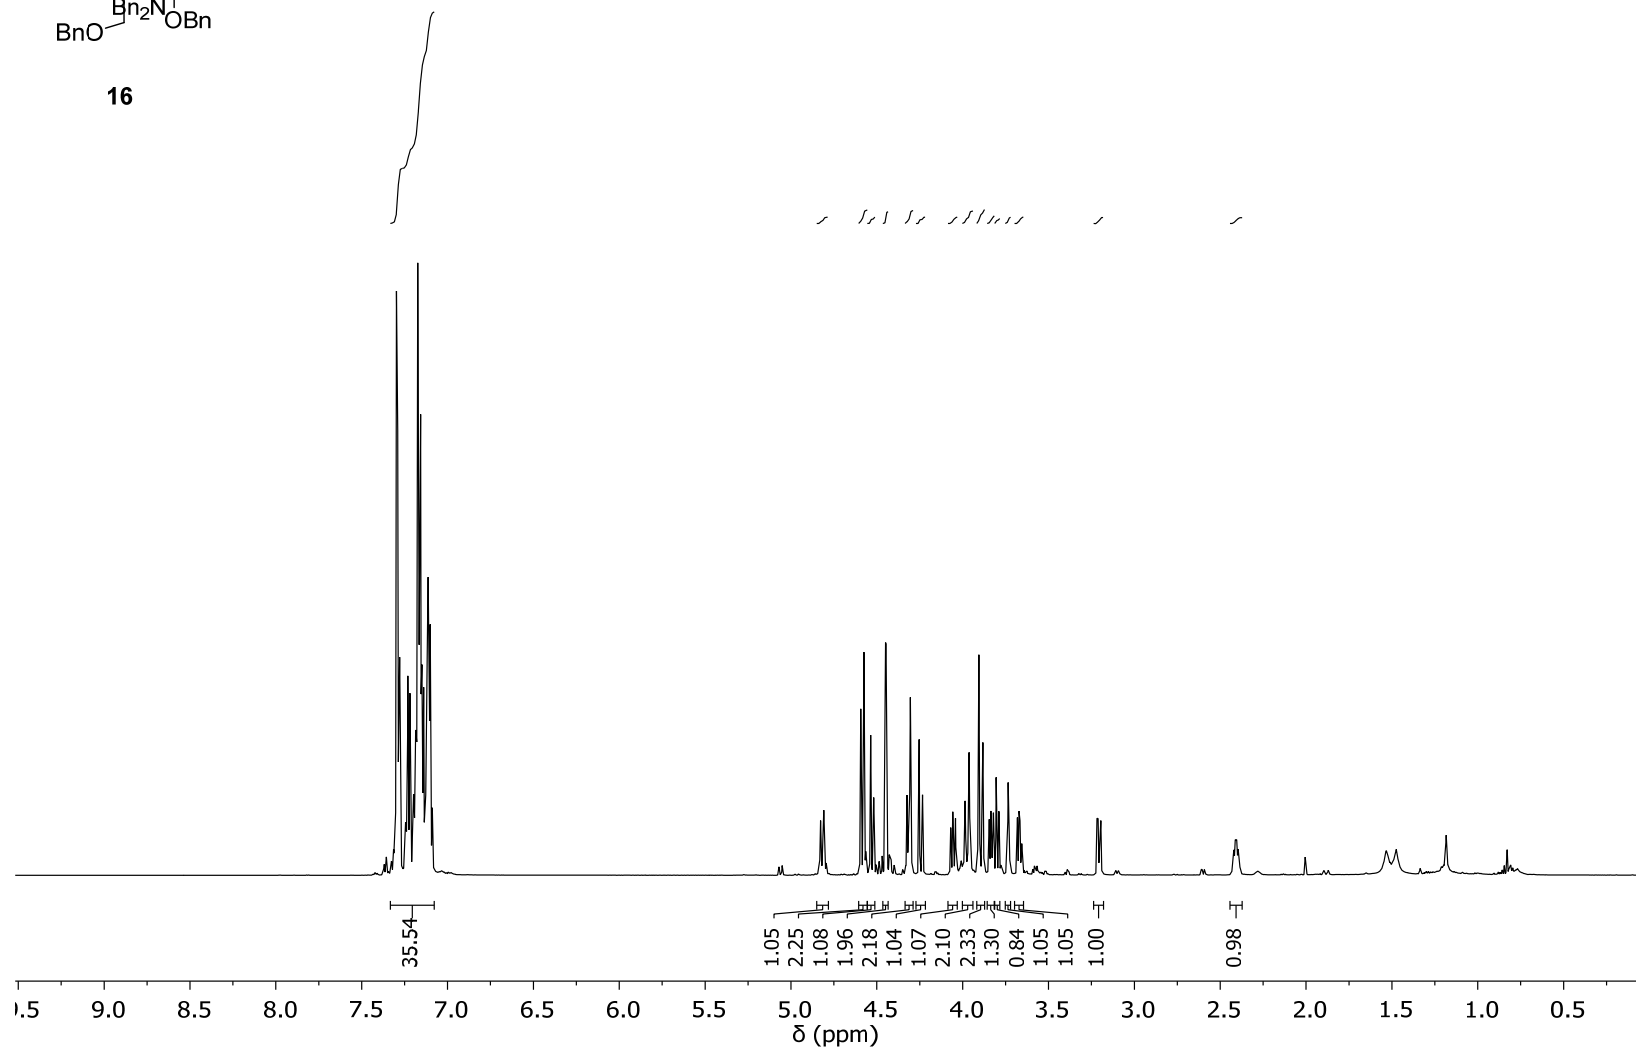

$^1\text{H}$  NMR spectrum (600 MHz,  $\text{CDCl}_3$ ) of **16**

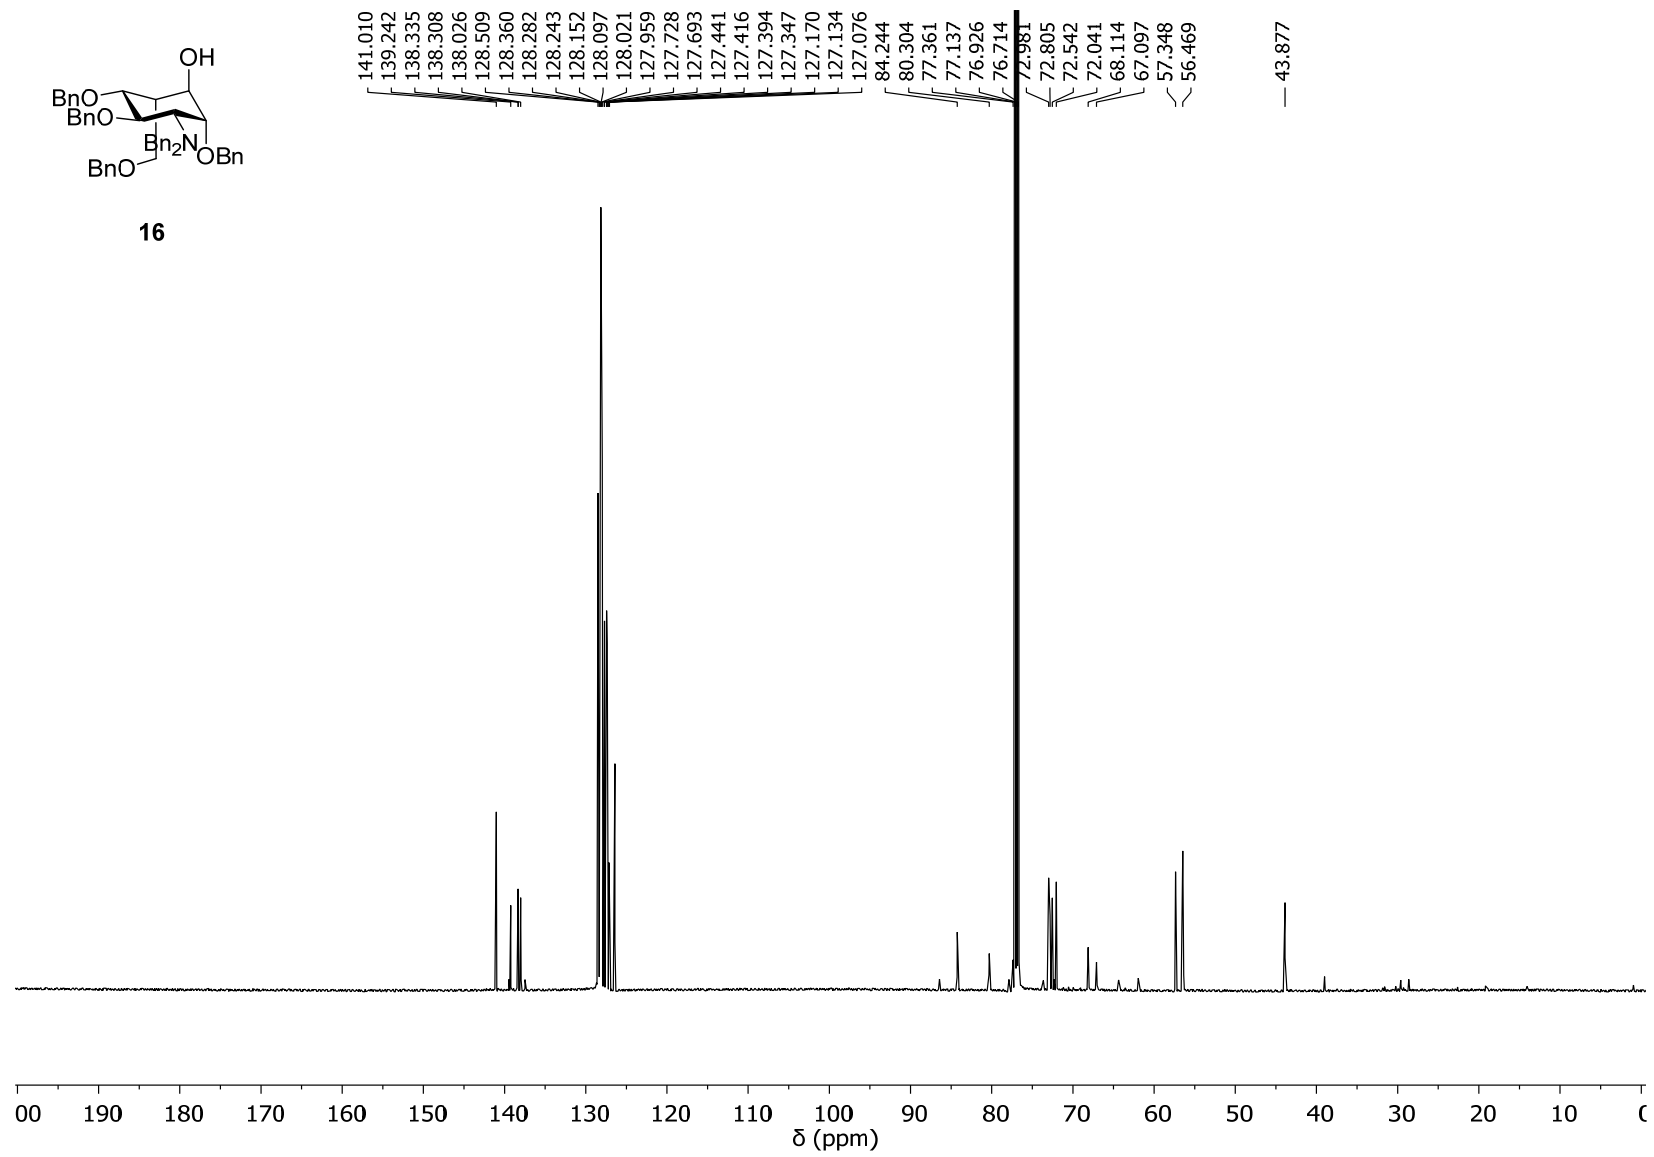

<sup>13</sup>C NMR spectrum (151 MHz, CDCl<sub>3</sub>) of **16**

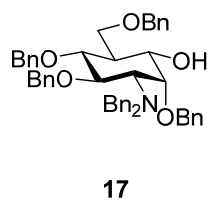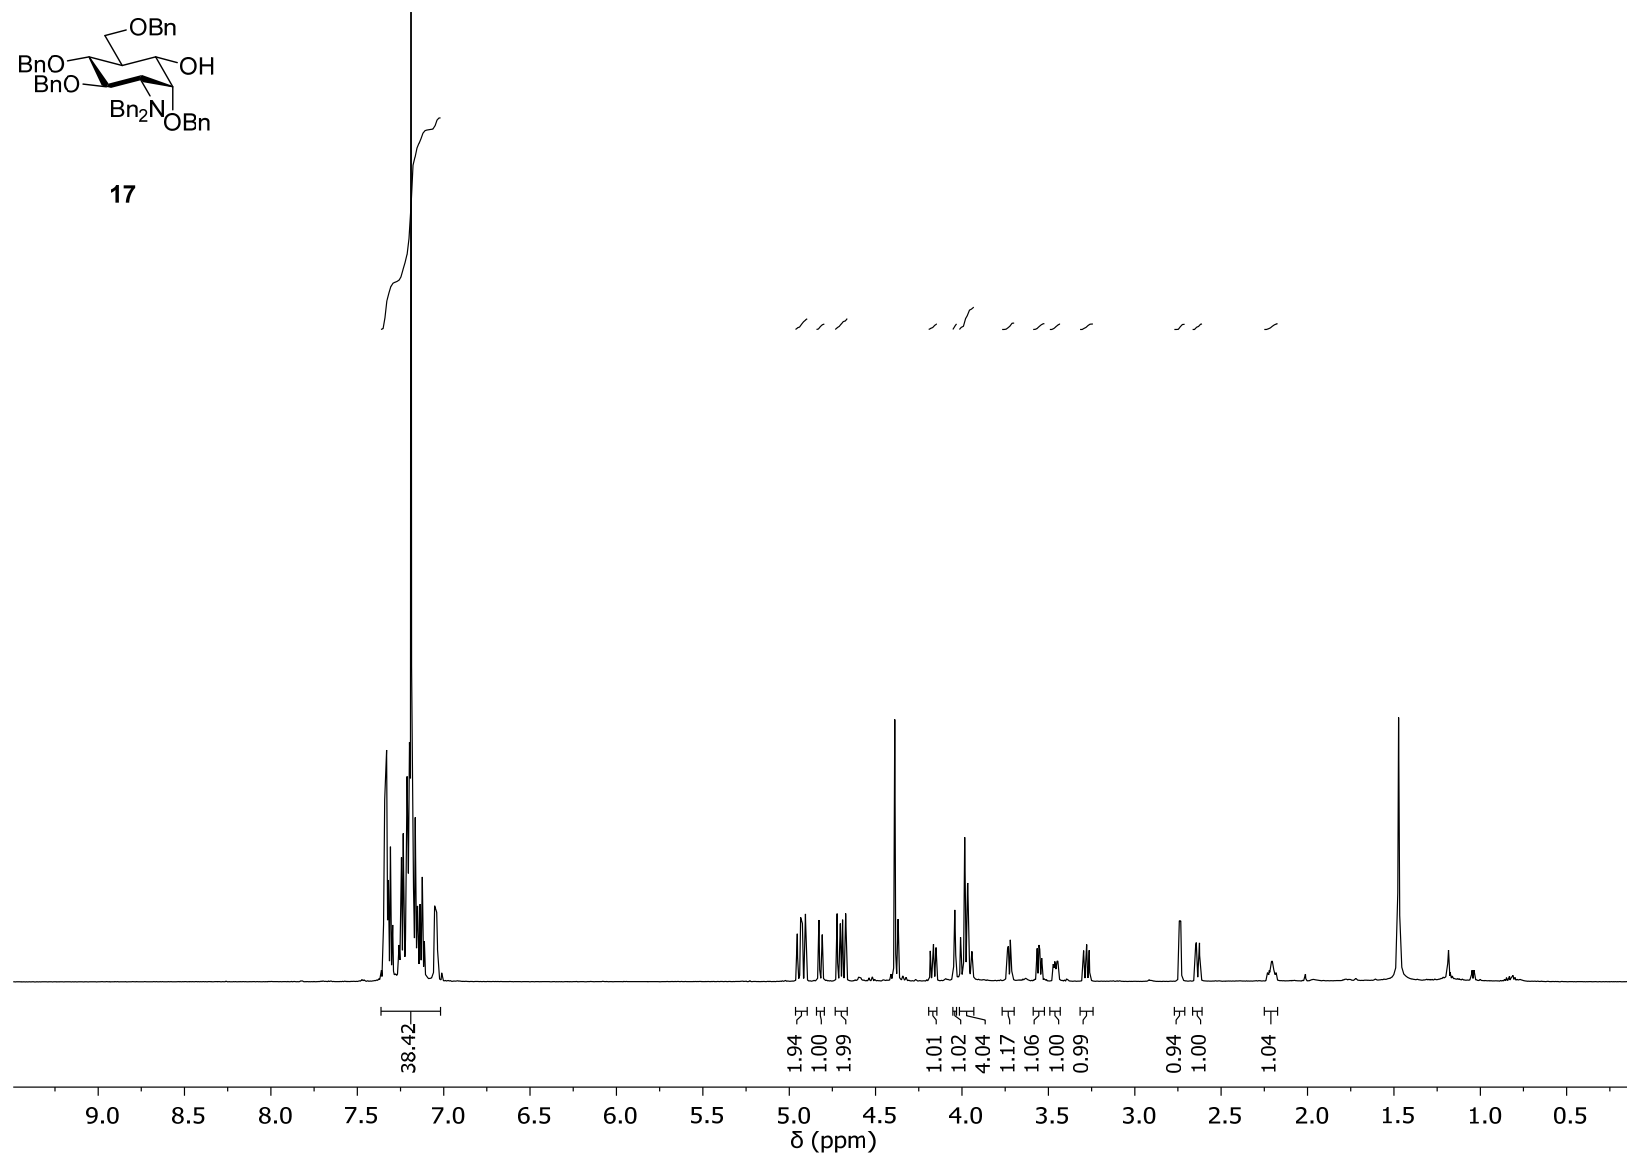

$^1\text{H}$  NMR spectrum (600 MHz,  $\text{CDCl}_3$ ) of **17**

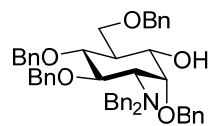

17

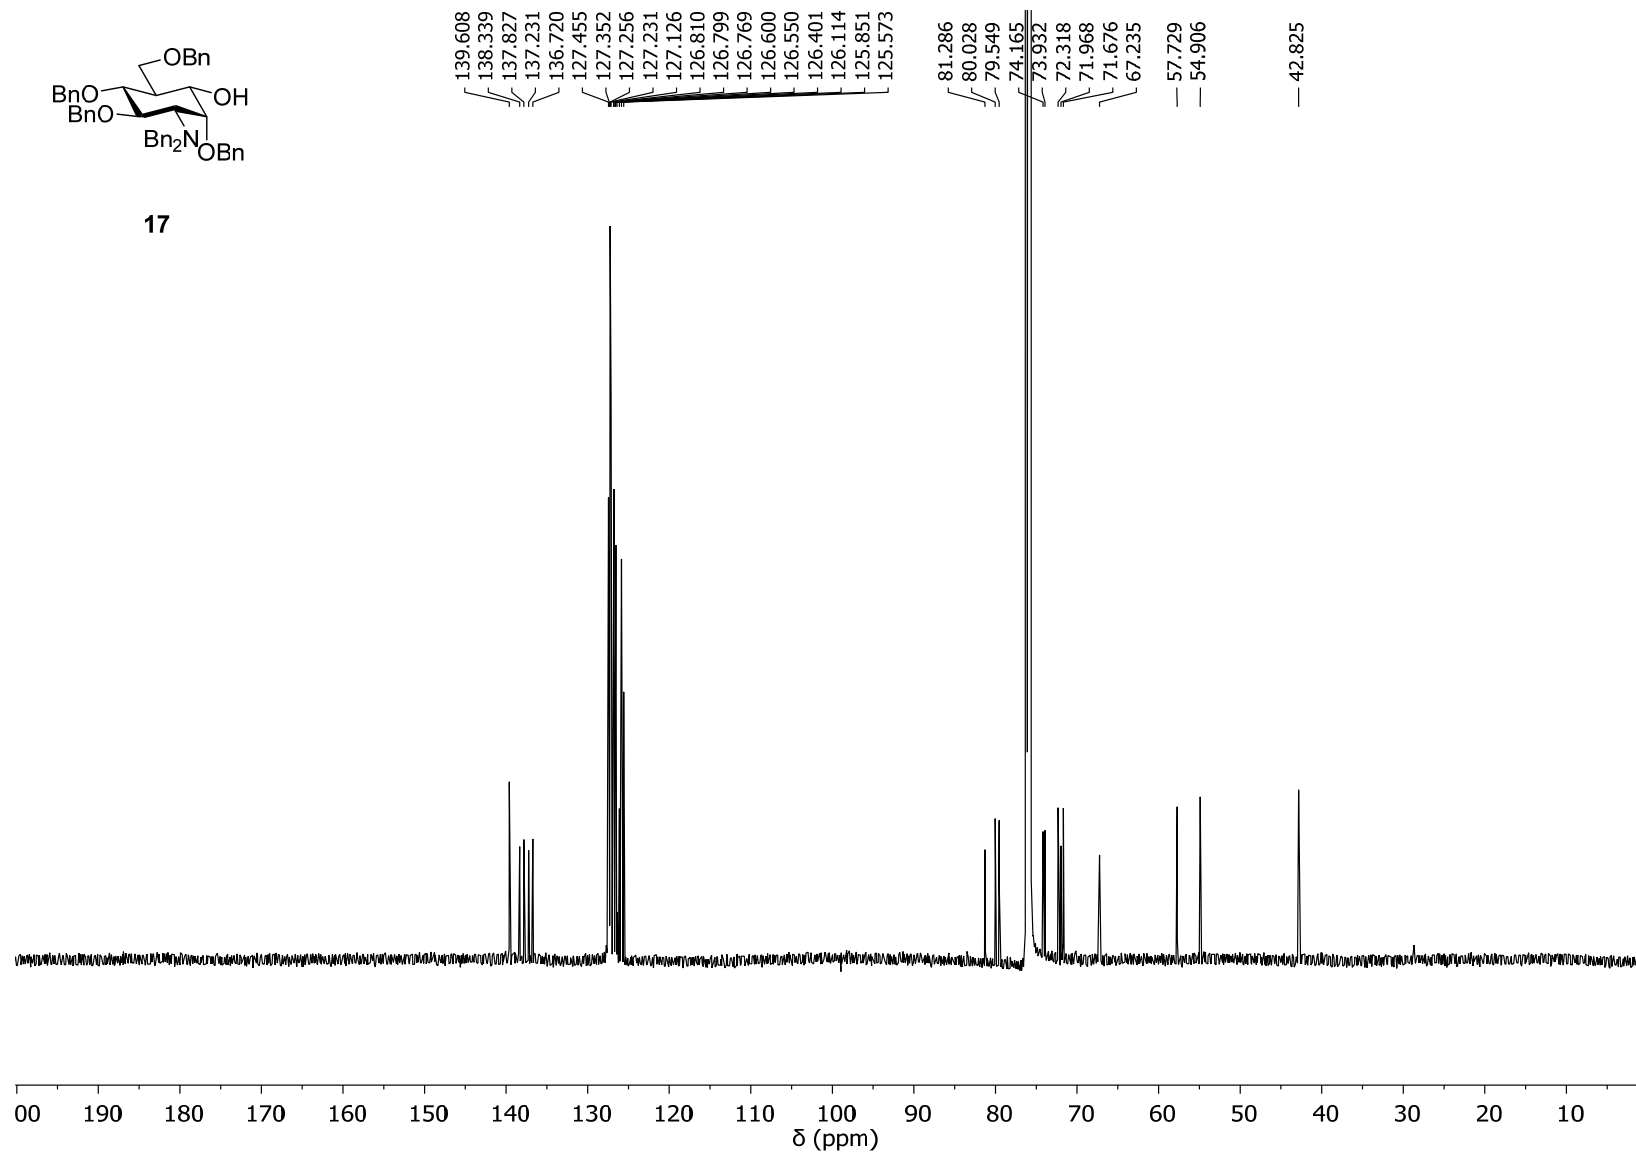

$^{13}\text{C}$  NMR spectrum (151 MHz,  $\text{CDCl}_3$ ) of **17**

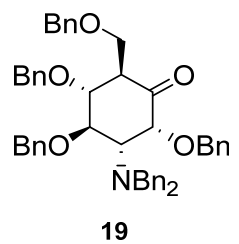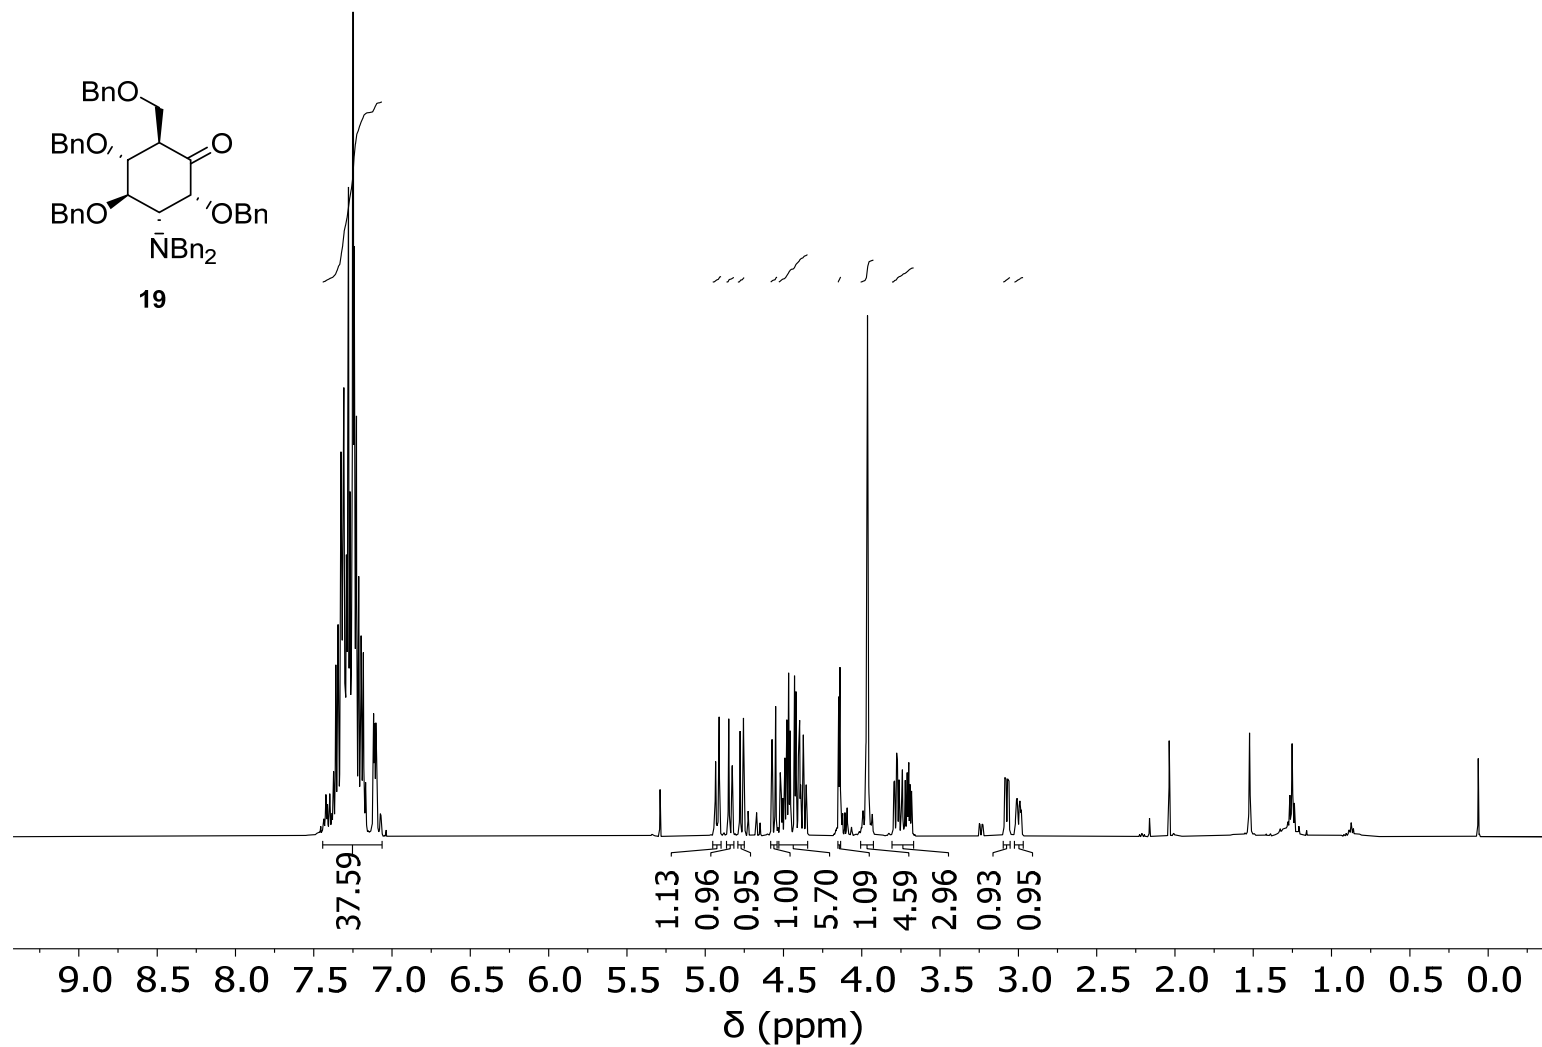

$^1\text{H}$  NMR spectrum (500 MHz,  $\text{CDCl}_3$ ) of **19**

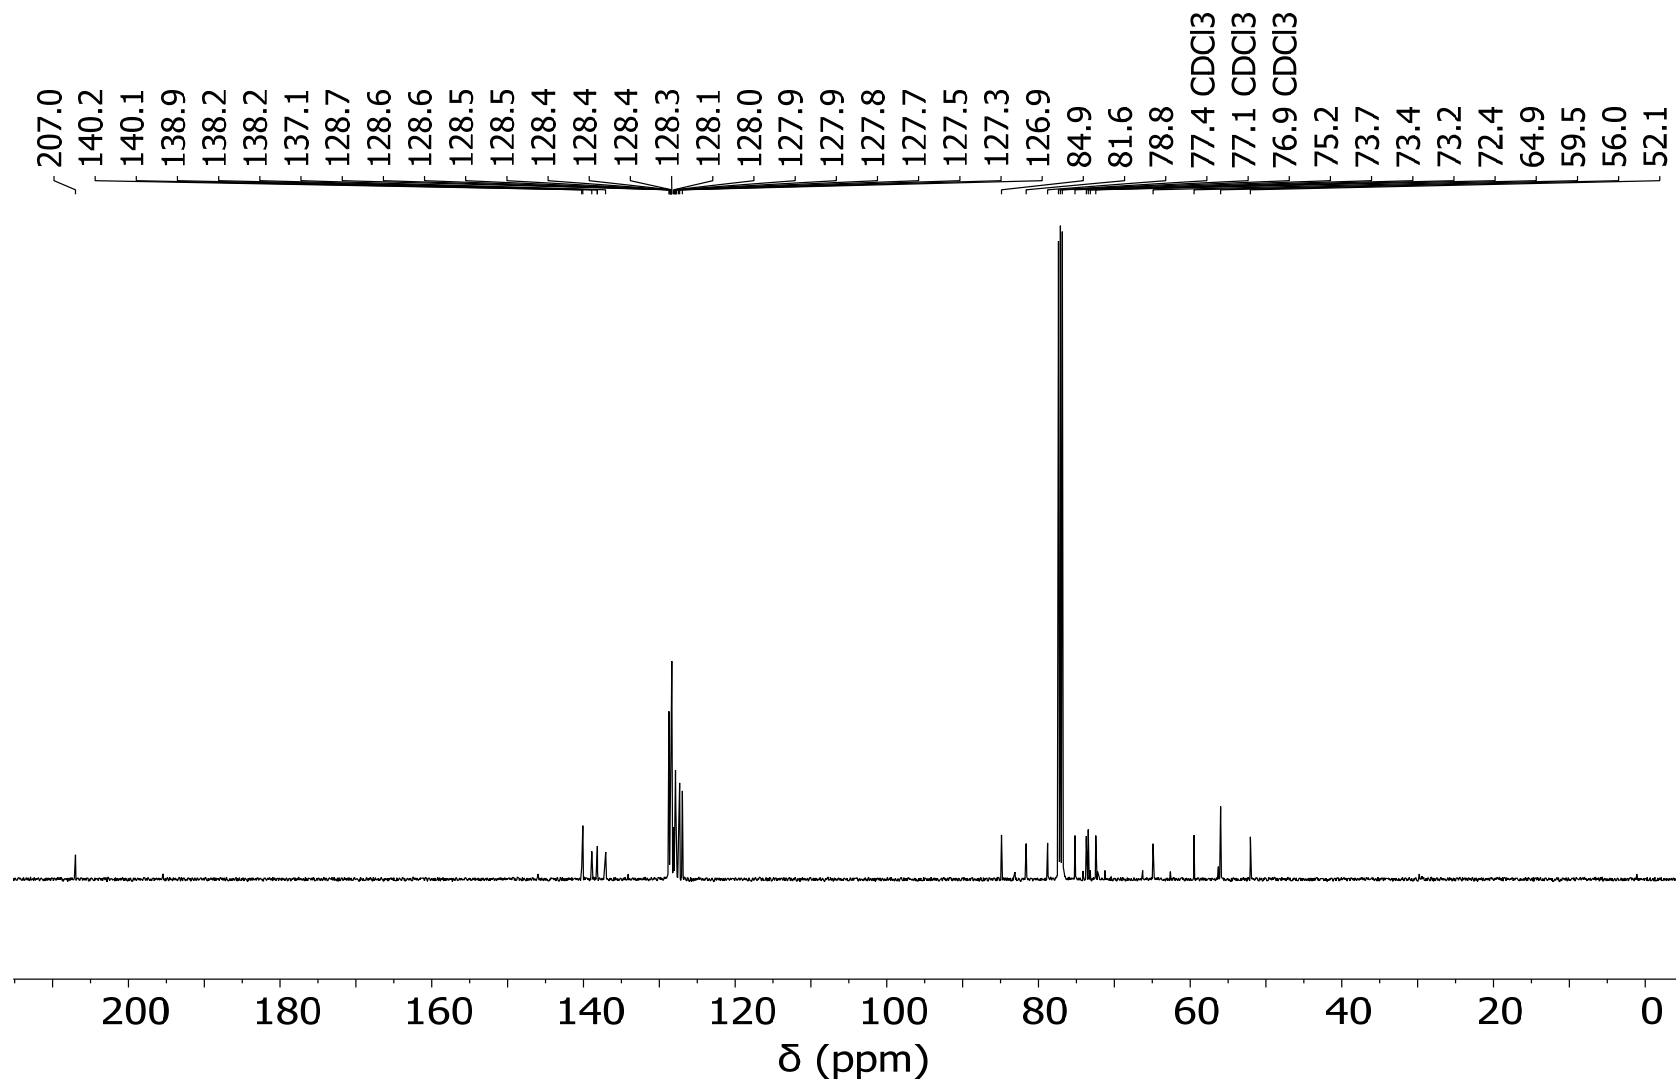

<sup>13</sup>C NMR spectrum (126 MHz, CDCl<sub>3</sub>) of 19



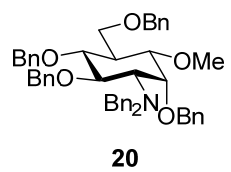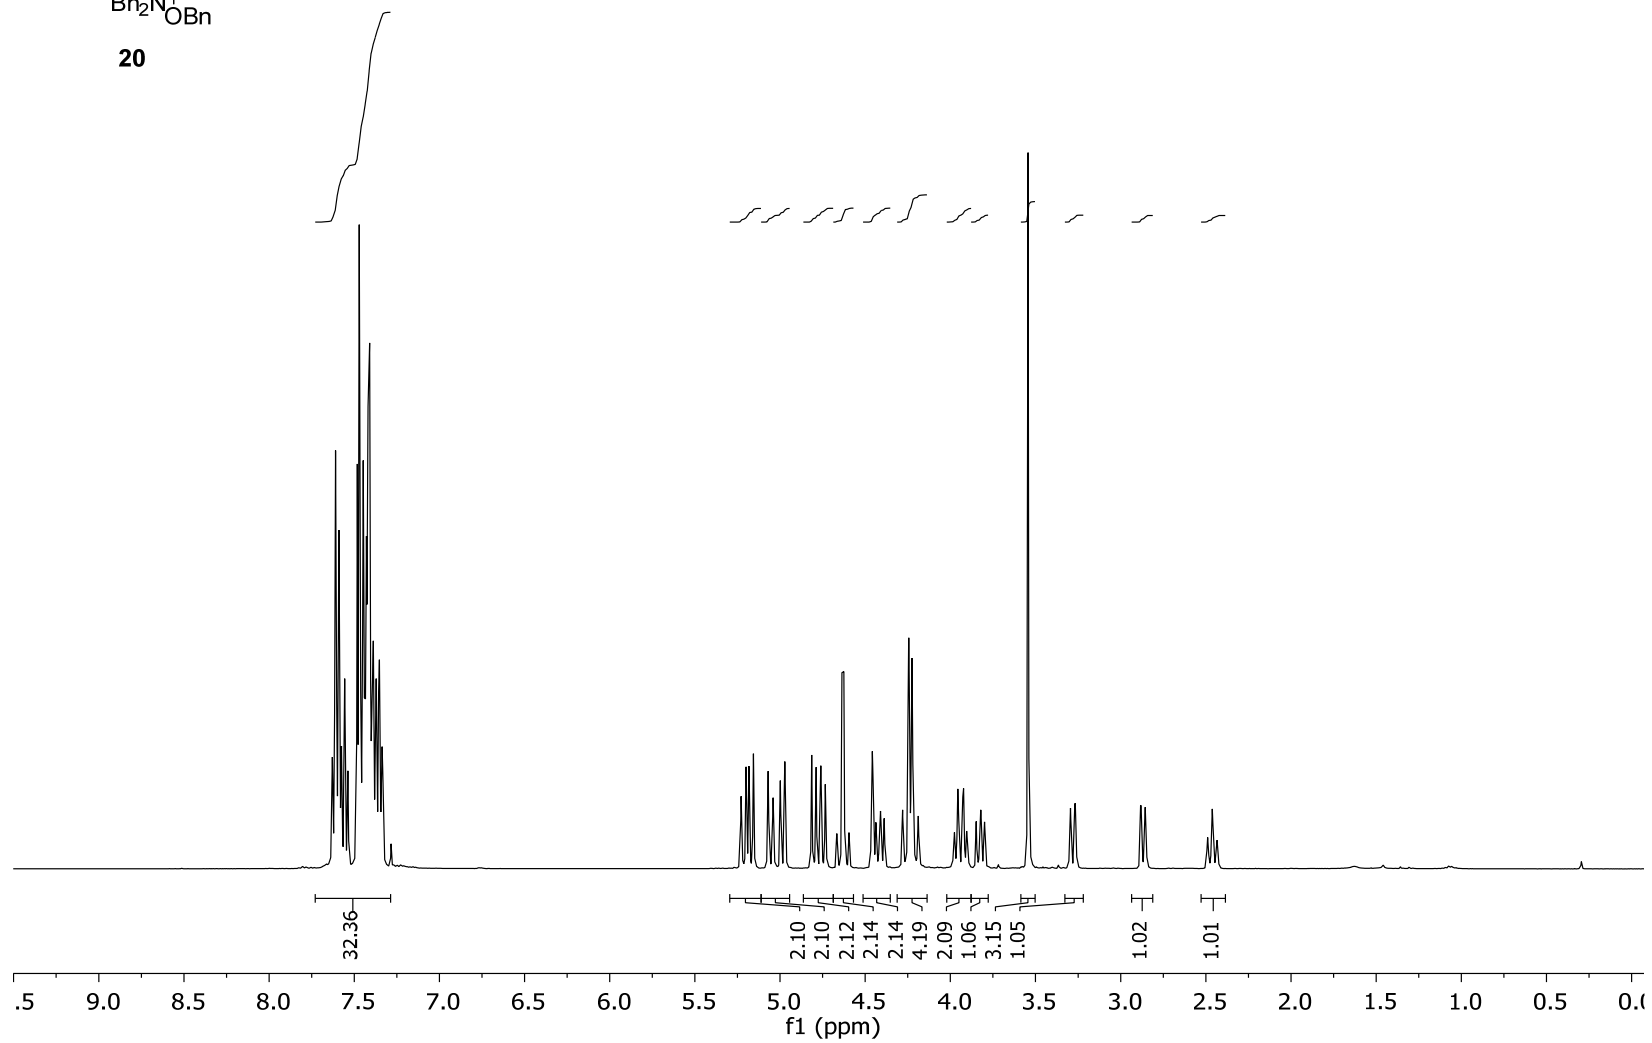

$^1\text{H}$  NMR spectrum (400 MHz,  $\text{CDCl}_3$ ) of **20**

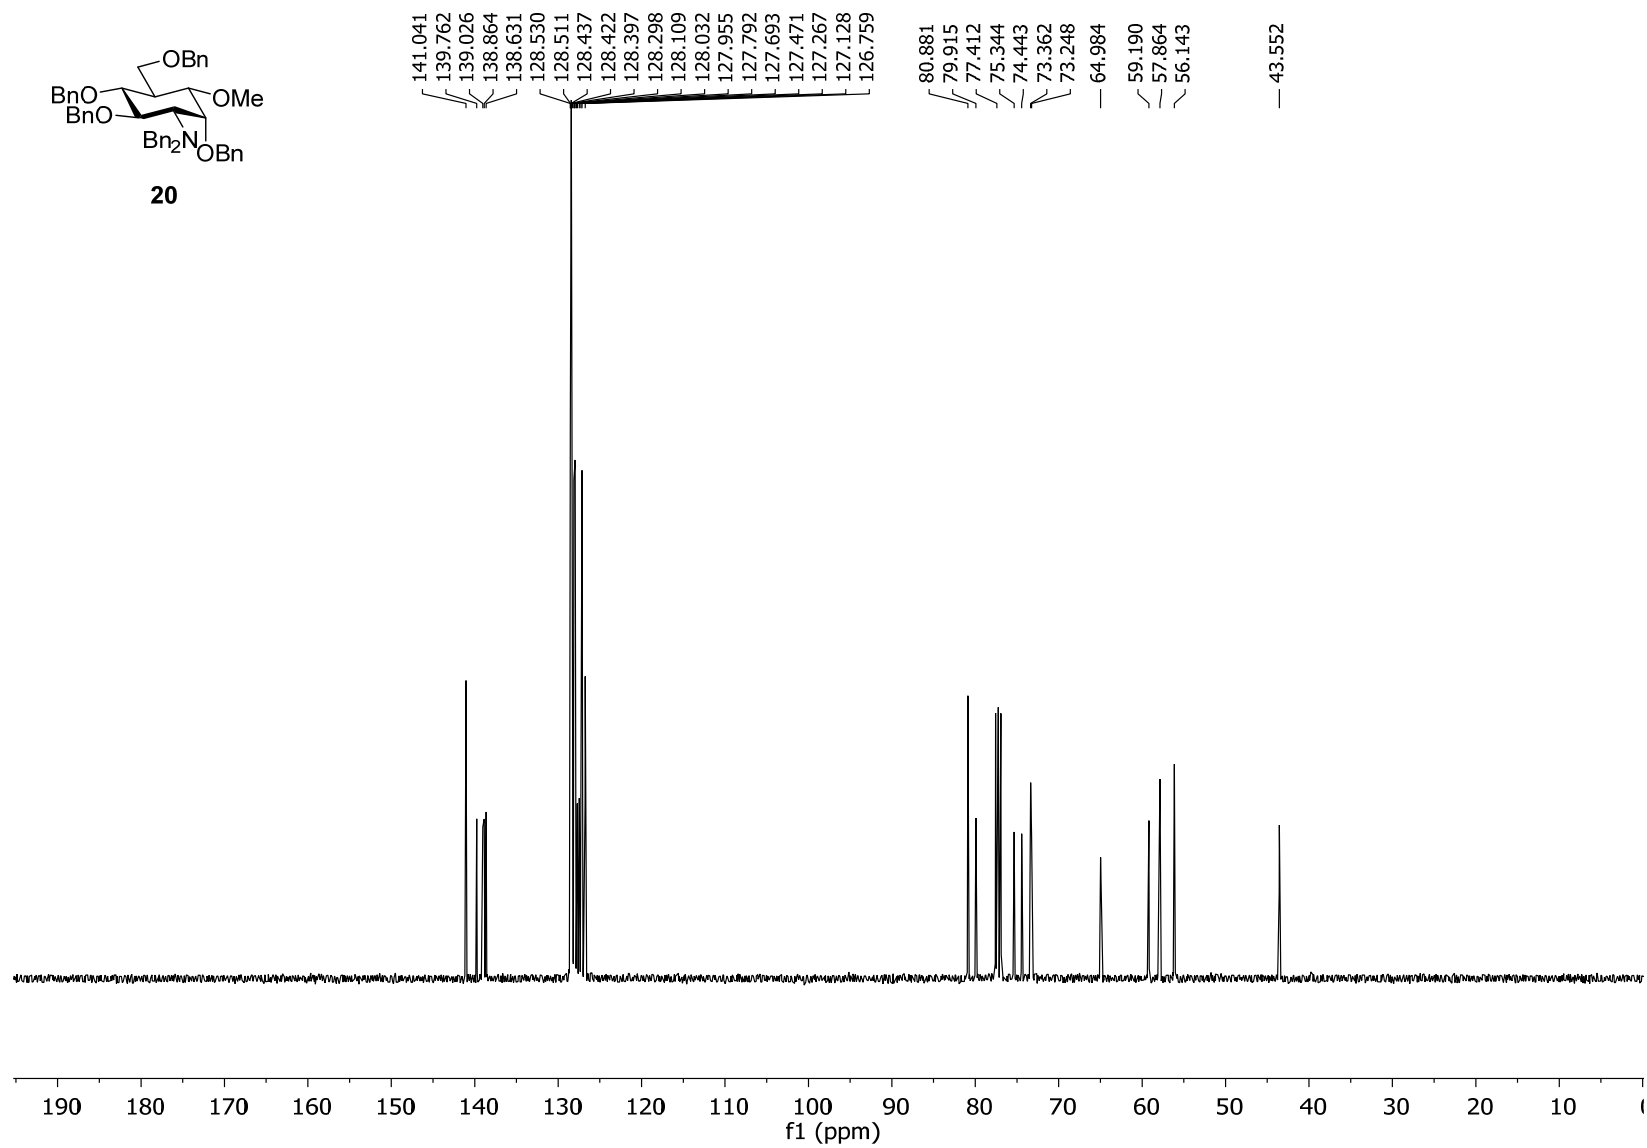

<sup>13</sup>C NMR spectrum (101 MHz, CDCl<sub>3</sub>) of **20**

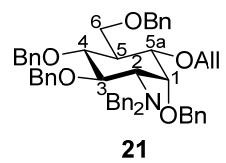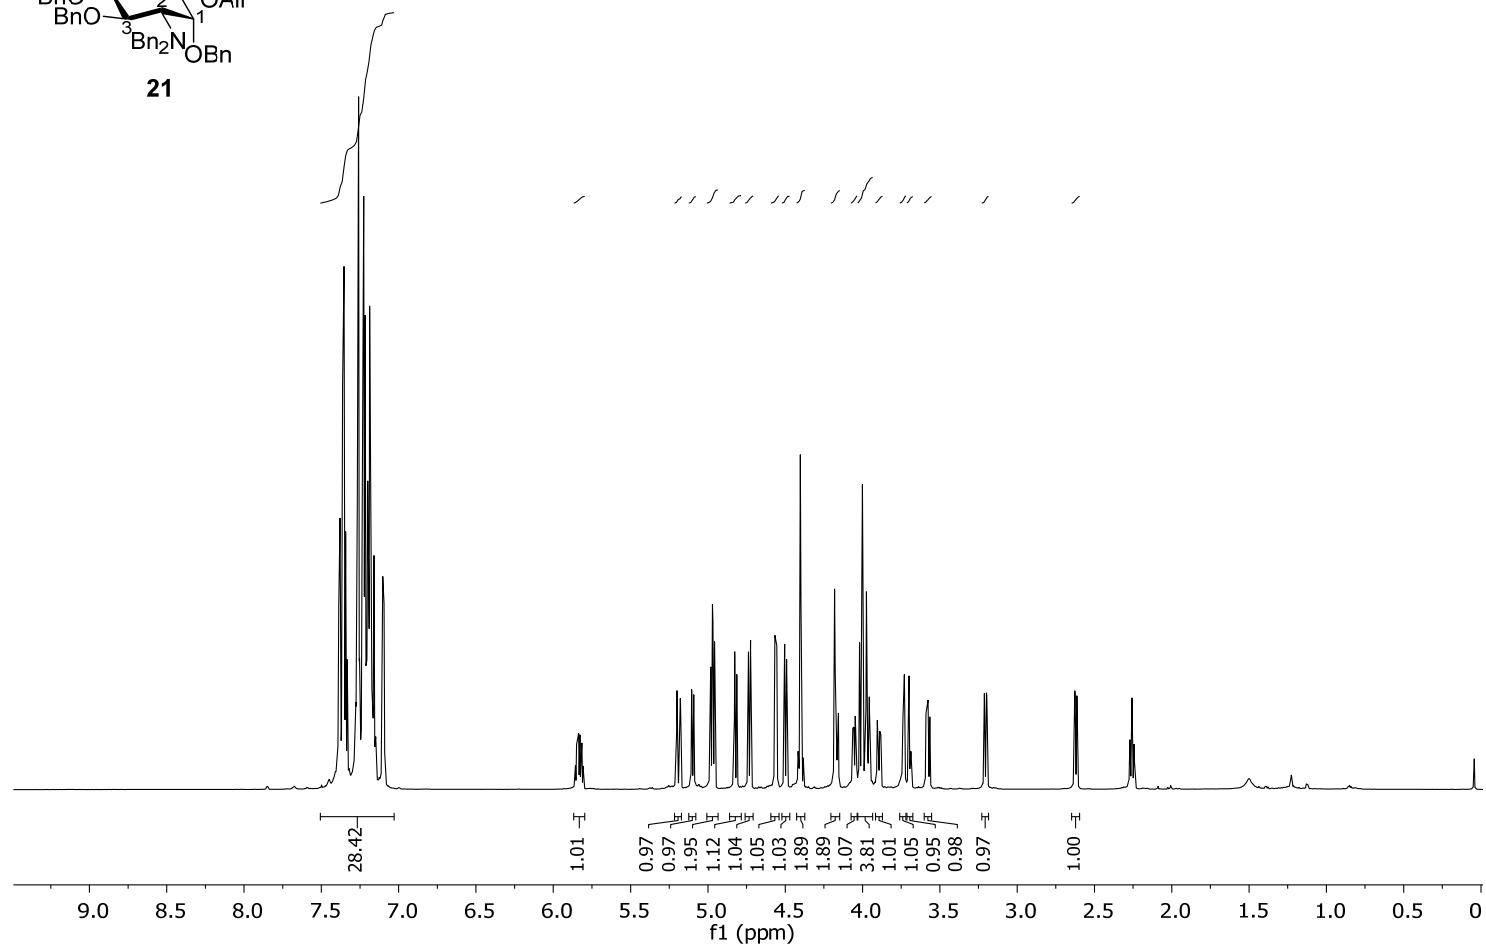

$^1\text{H}$  NMR spectrum (800 MHz,  $\text{CDCl}_3$ ) of **21**

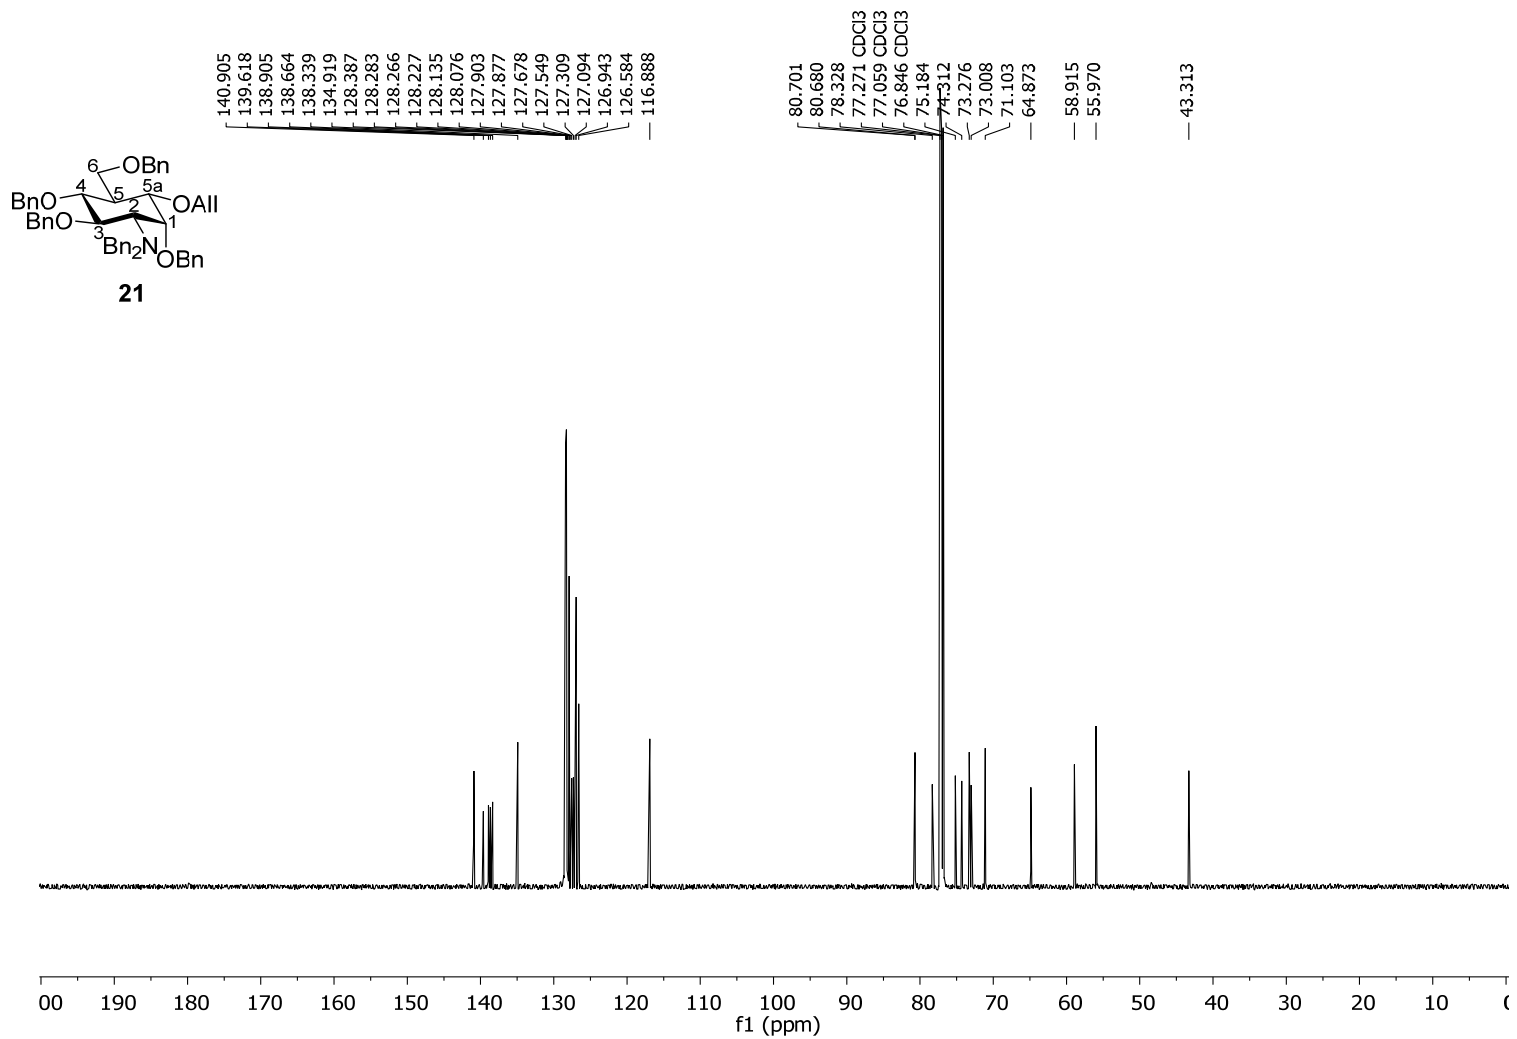

<sup>13</sup>C NMR spectrum (151 MHz, CDCl<sub>3</sub>) of **21**

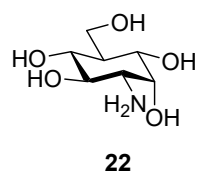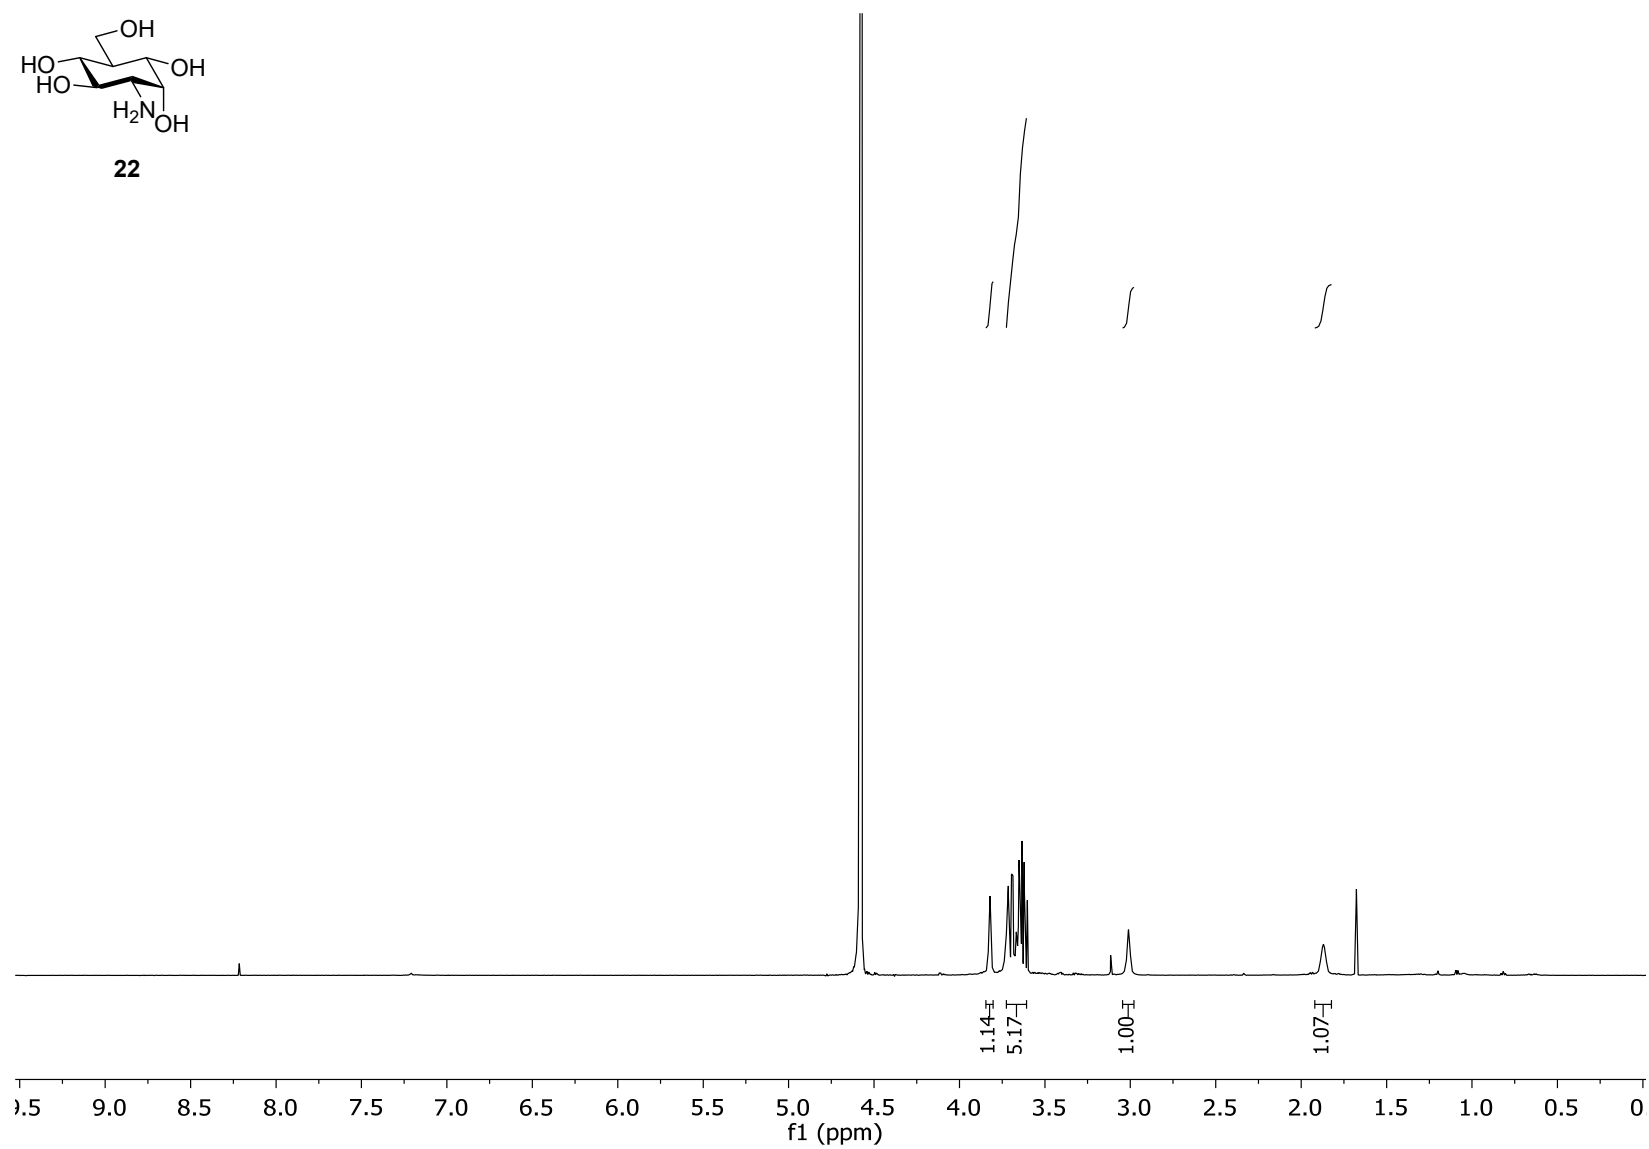

$^1\text{H}$  NMR spectrum (600 MHz,  $\text{D}_2\text{O}$ ) of **22**

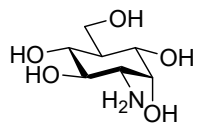

22

71.877  
71.121  
70.629  
68.018  
— 59.323  
— 54.942  
— 44.561

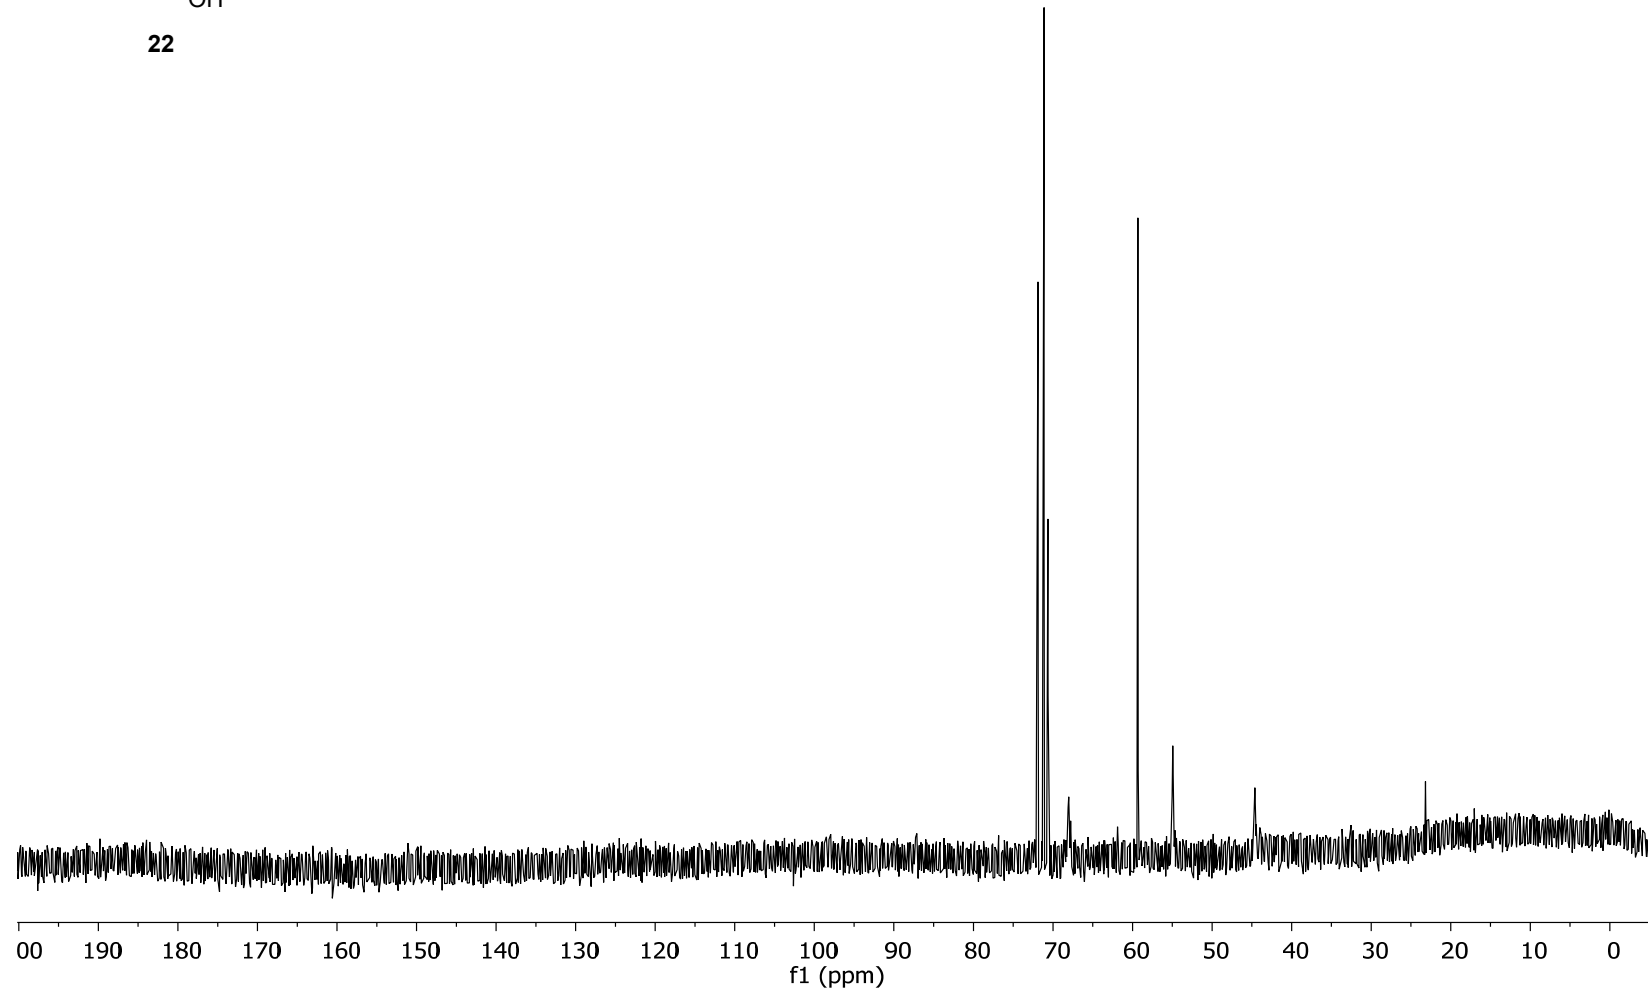

<sup>13</sup>C NMR spectrum (151 MHz, D<sub>2</sub>O) of 22

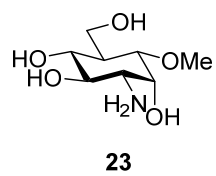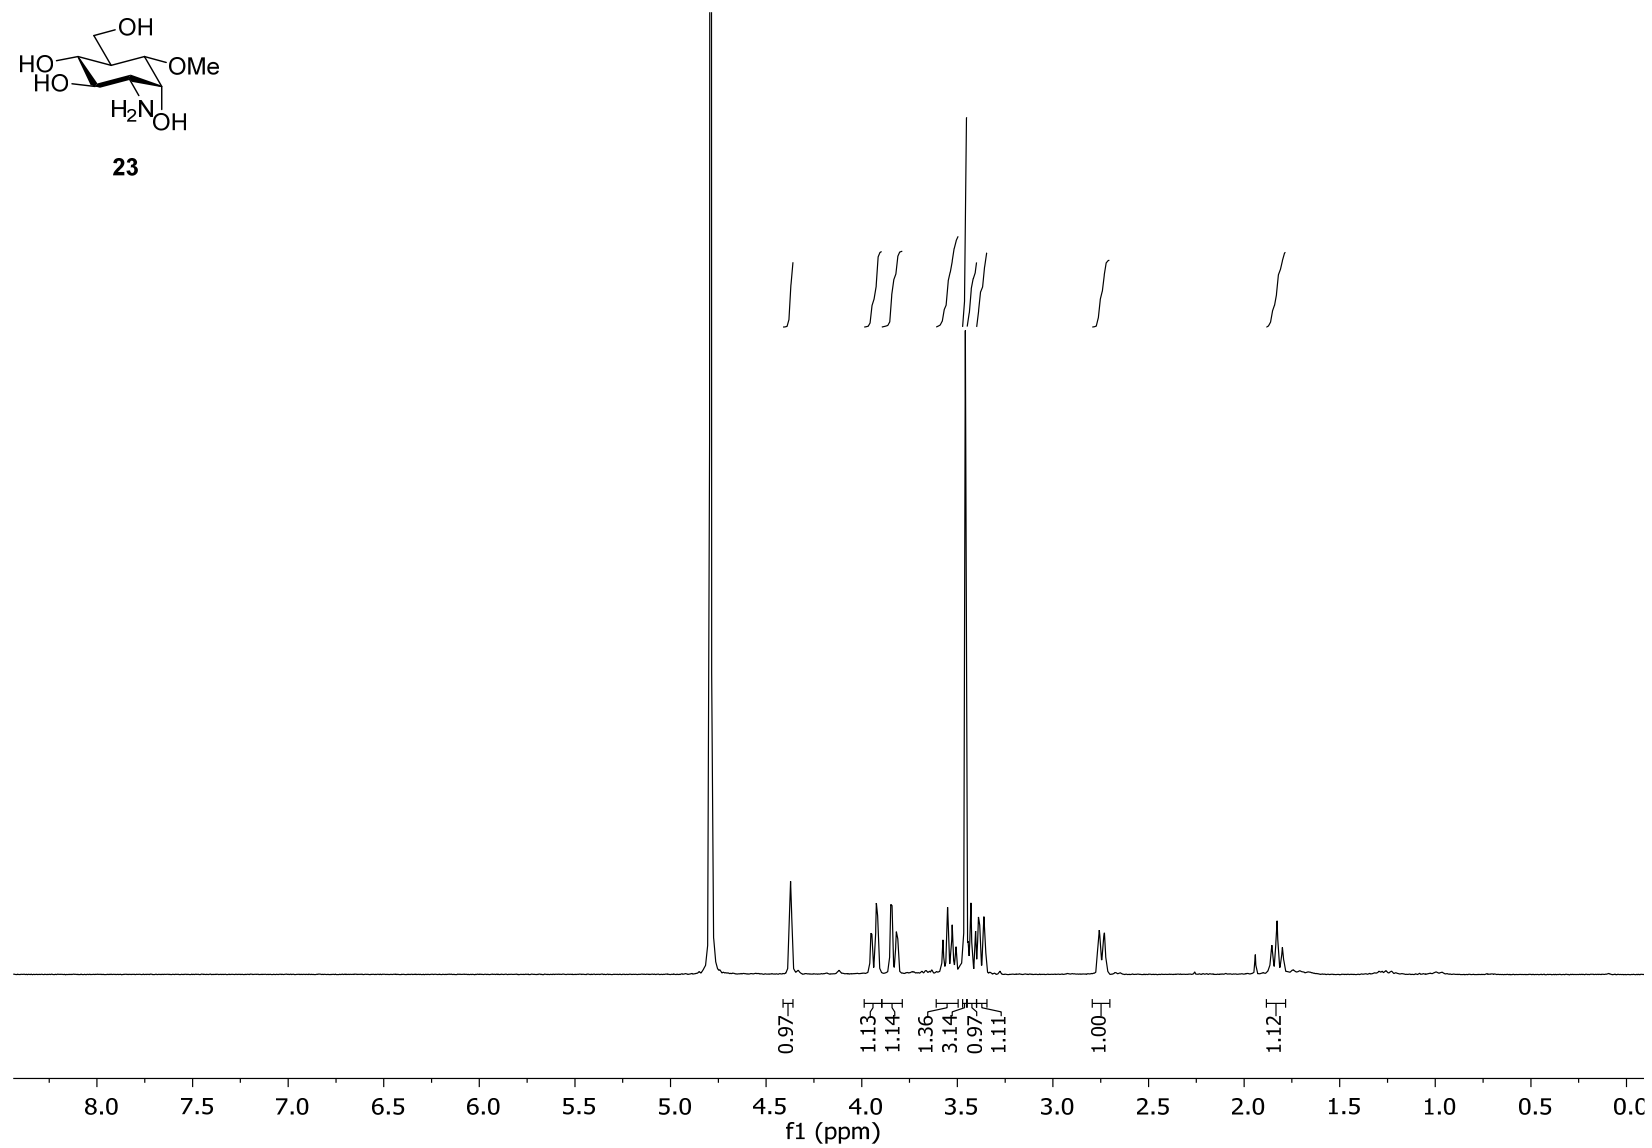

$^1\text{H}$  NMR spectrum (400 MHz,  $\text{D}_2\text{O}$ ) of **23**

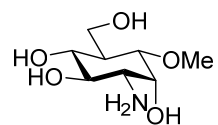

23

76.694  
73.721  
69.867  
66.520  
56.762  
56.351  
53.078  
43.200

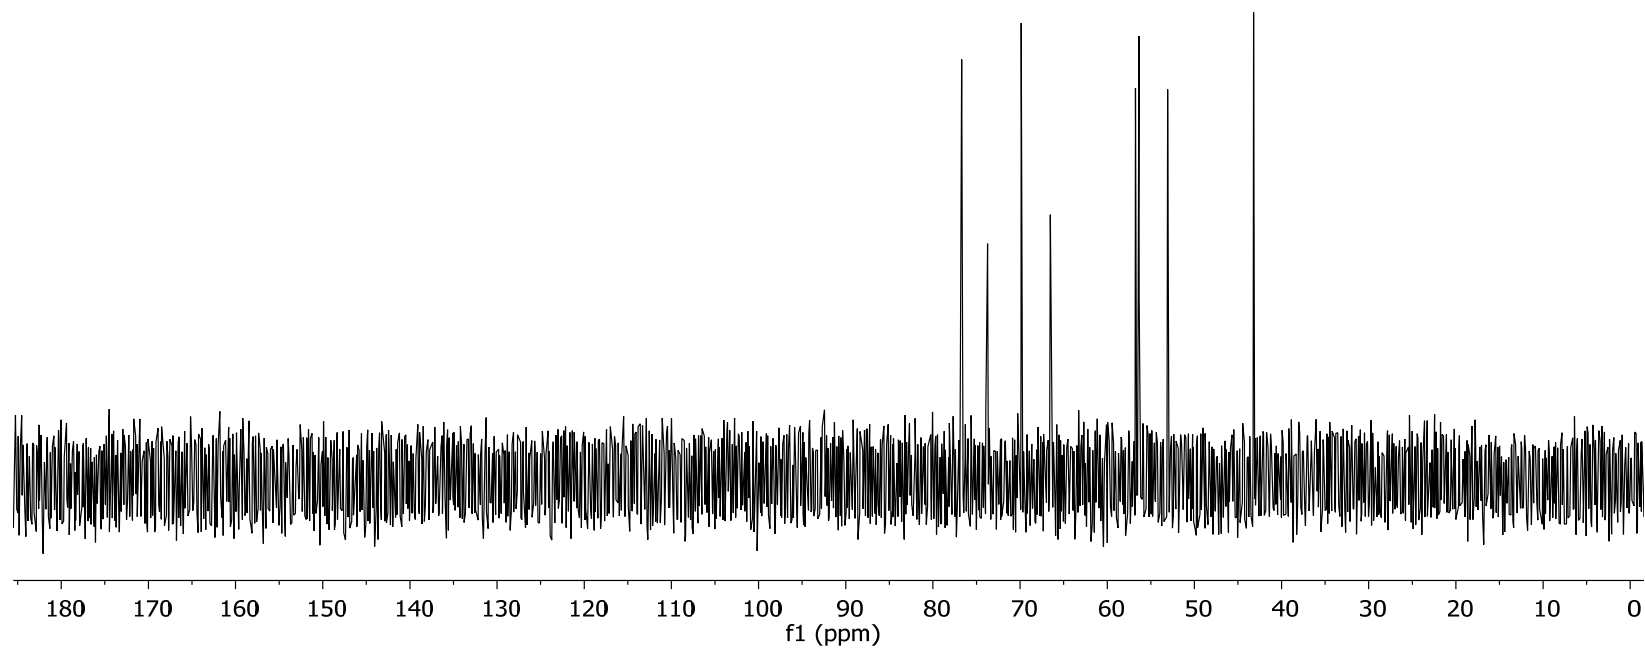

<sup>13</sup>C NMR spectrum (101 MHz, D<sub>2</sub>O) of 23



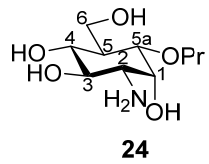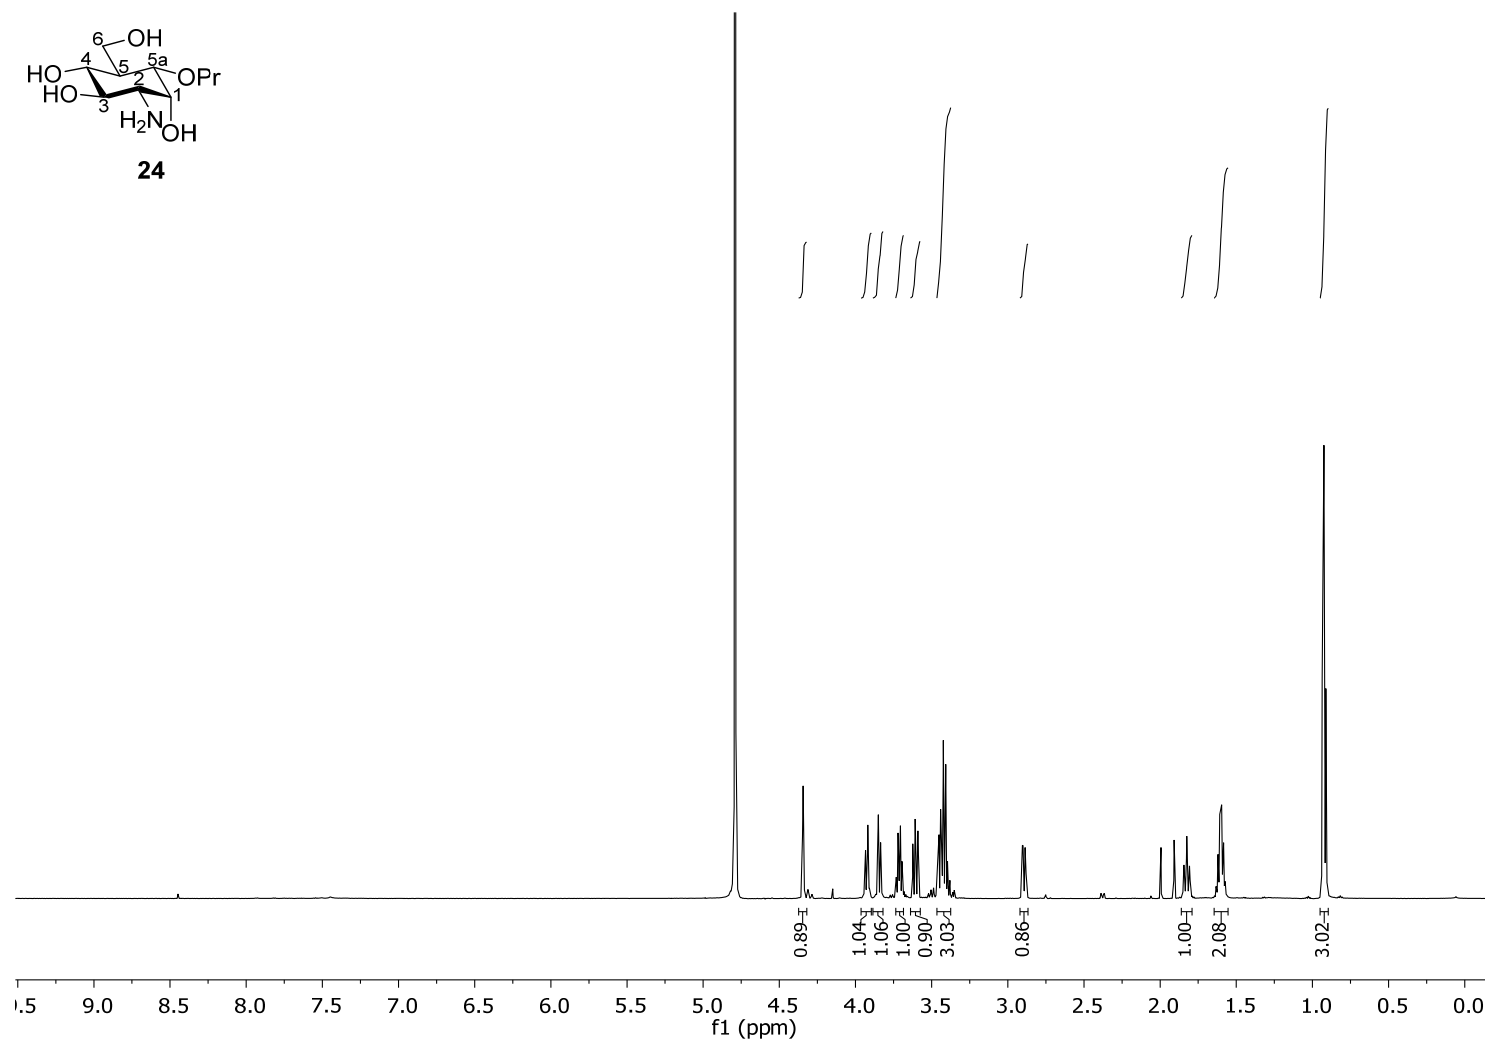

$^1\text{H}$  NMR spectrum (600 MHz,  $\text{D}_2\text{O}$ ) of **24**

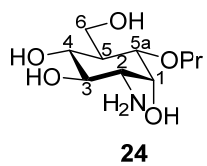

- 75.043
- 72.526
- 71.480
- 69.694
- 66.458
- 56.581
- 53.296
- 43.048
- 22.282
- 9.855

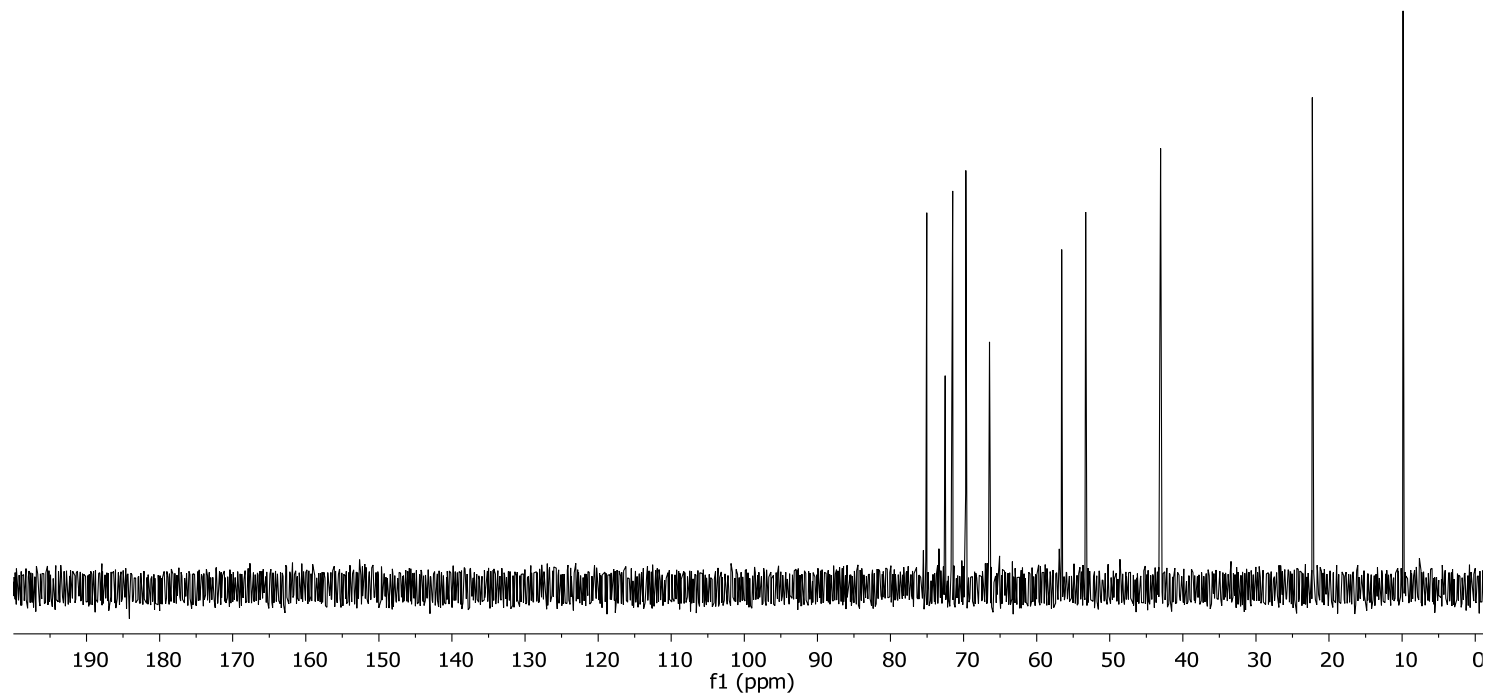

<sup>13</sup>C NMR spectrum (151 MHz, D<sub>2</sub>O) of **24**

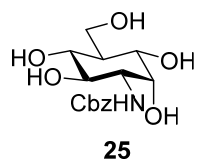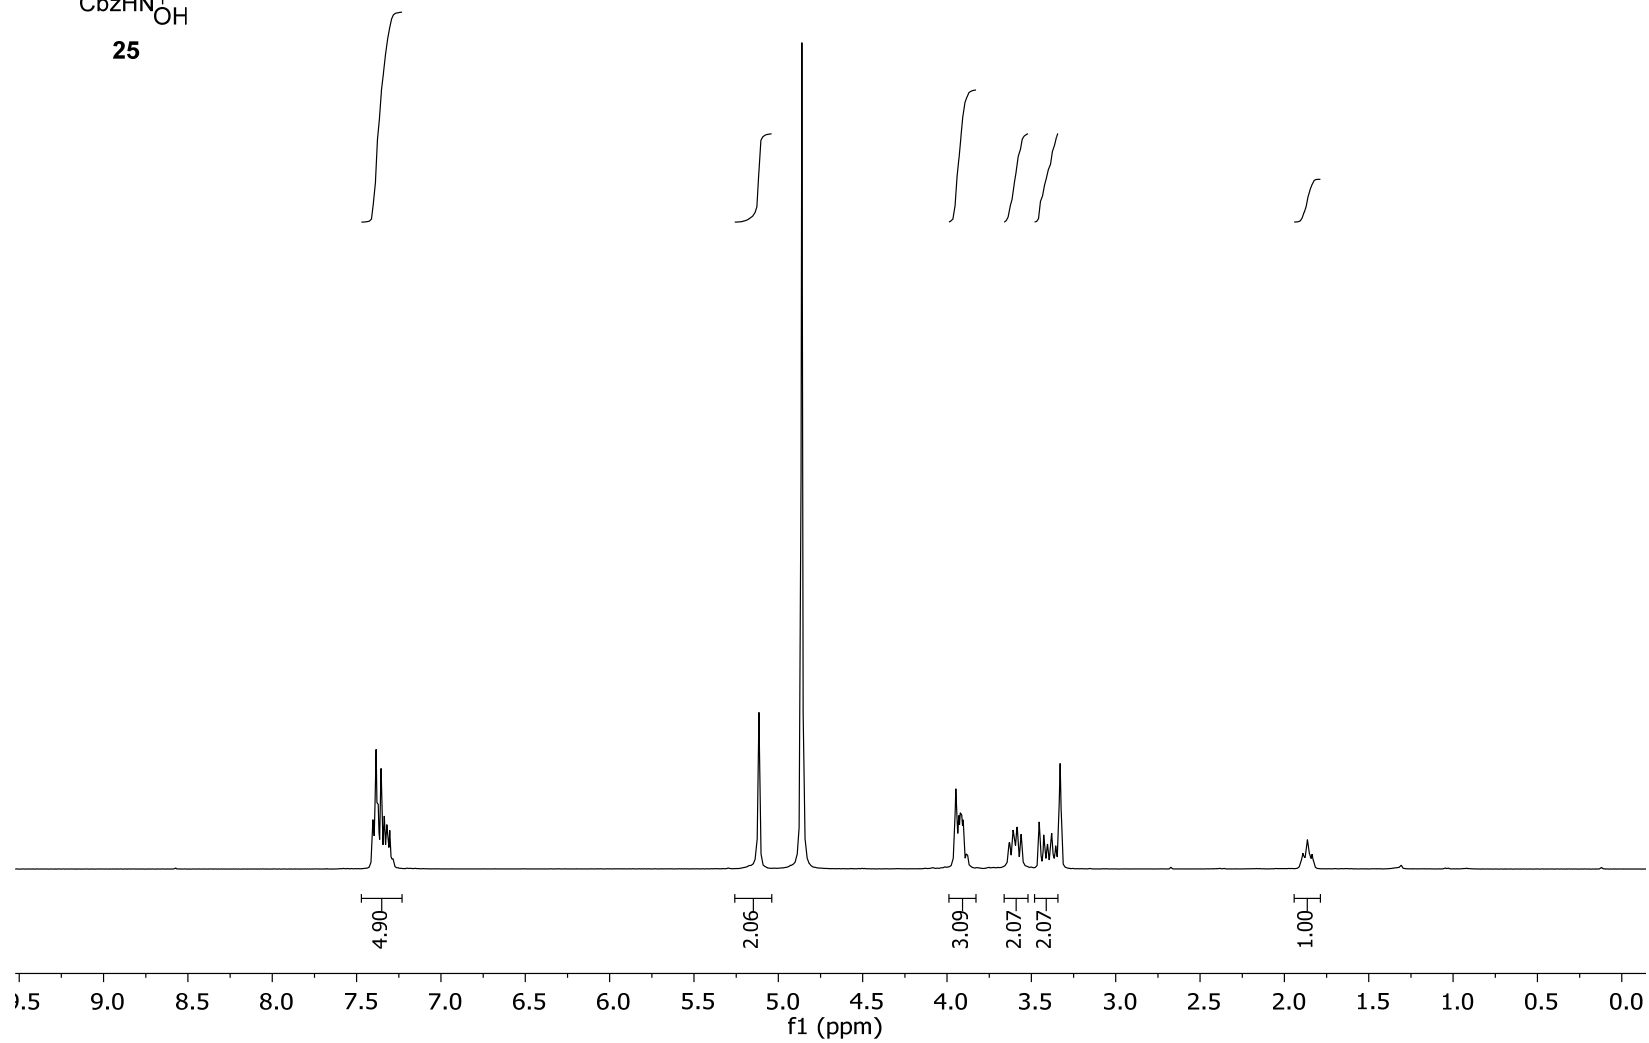

$^1\text{H}$  NMR spectrum (400 MHz,  $\text{CD}_3\text{OD}$ ) of **25**

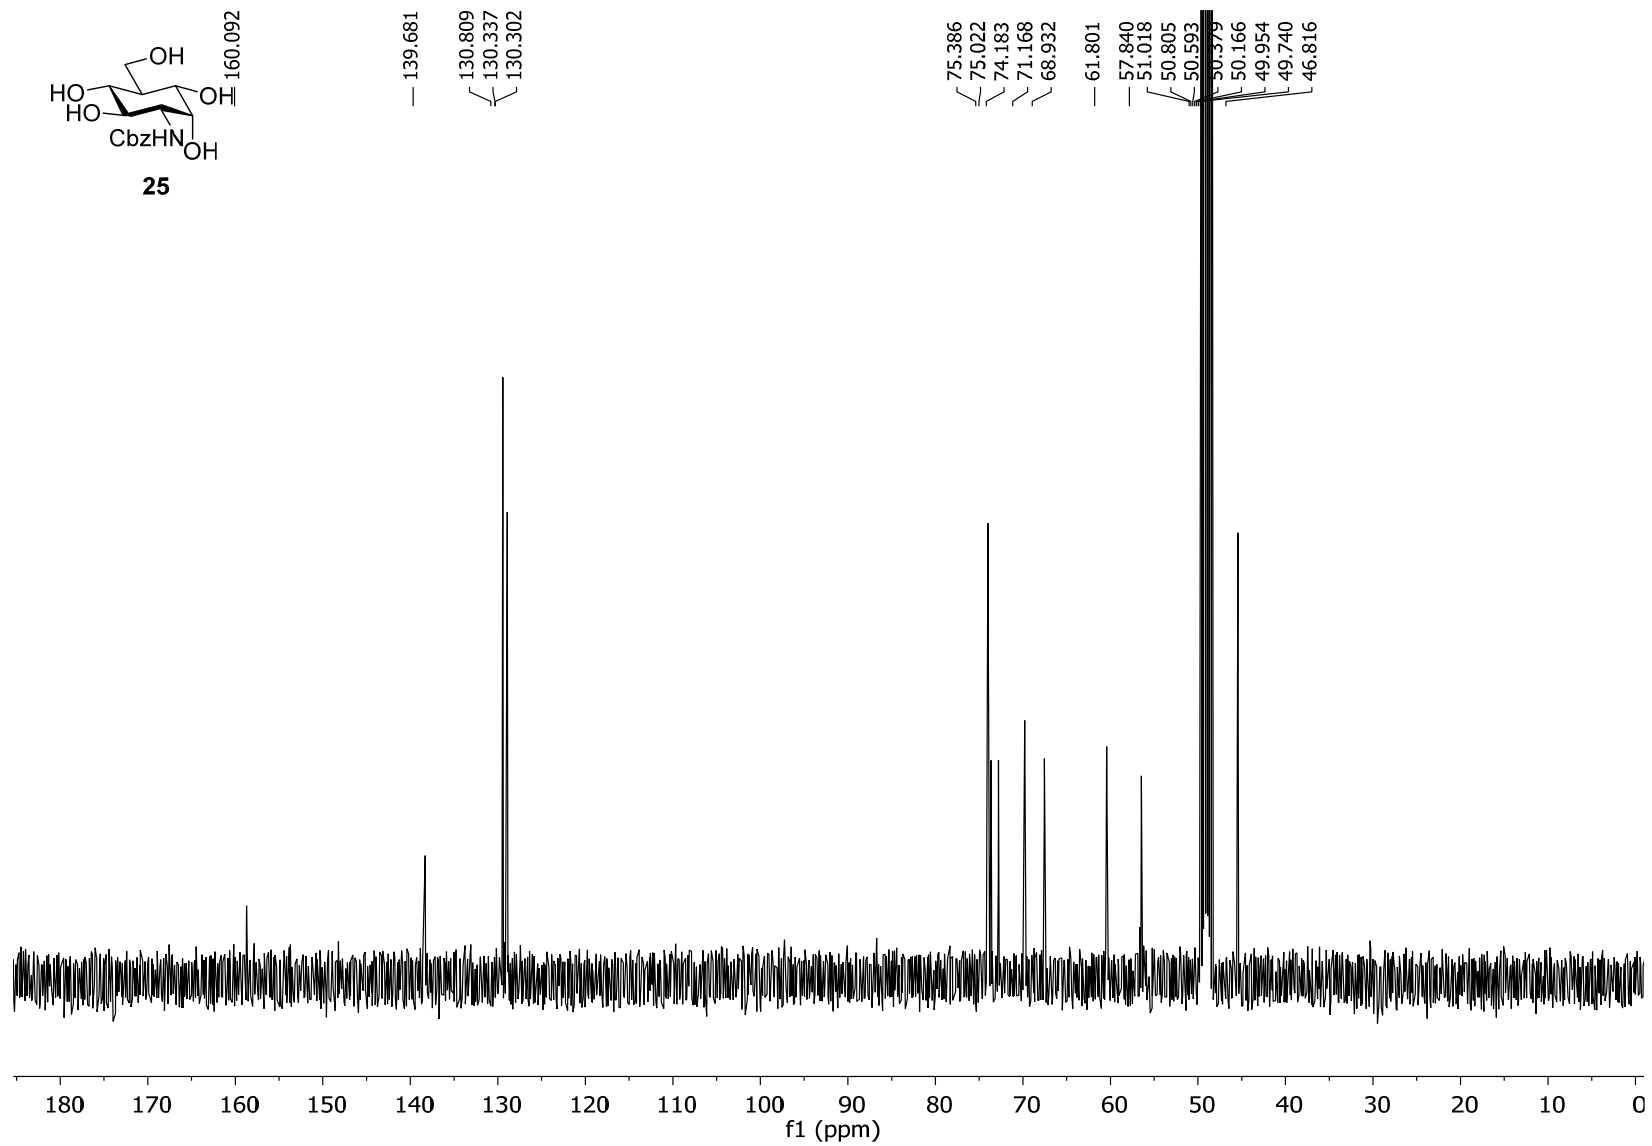

$^{13}\text{C}$  NMR spectrum (101 MHz,  $\text{CD}_3\text{OD}$ ) of **25**

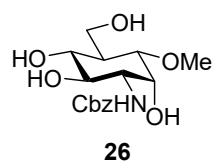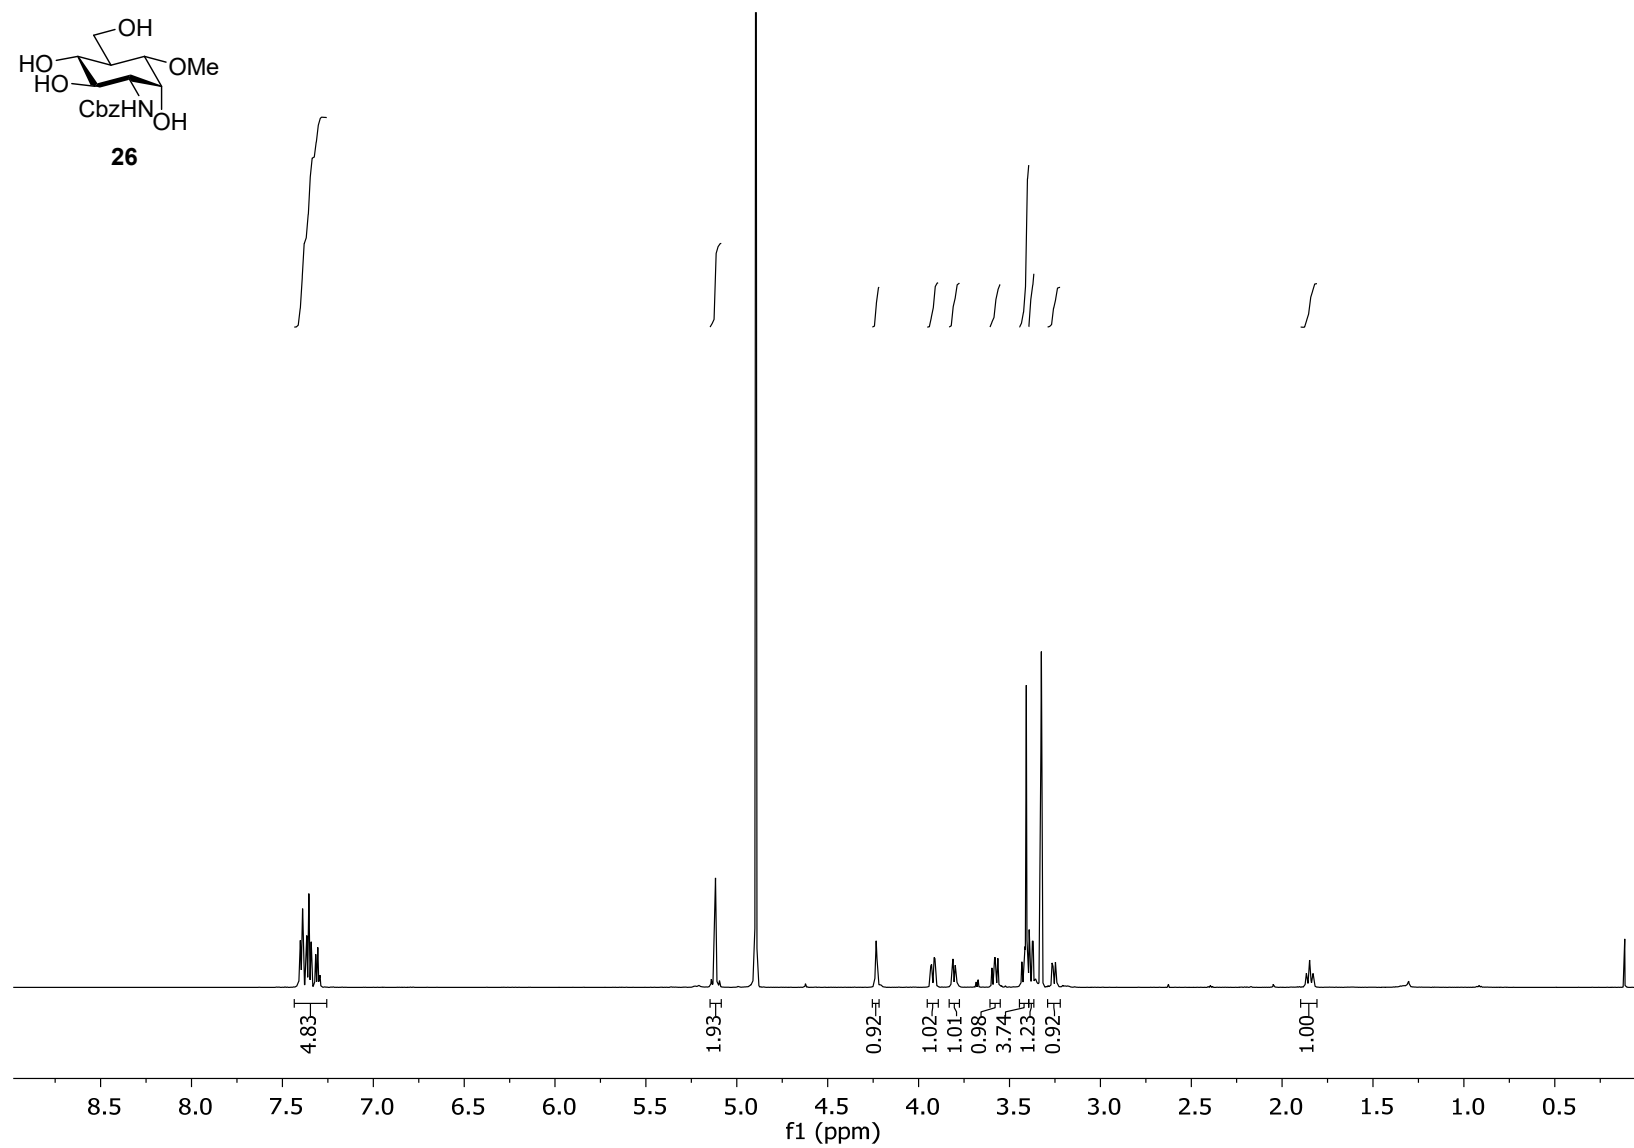

<sup>1</sup>H NMR spectrum (400 MHz, CD<sub>3</sub>OD) of **26**

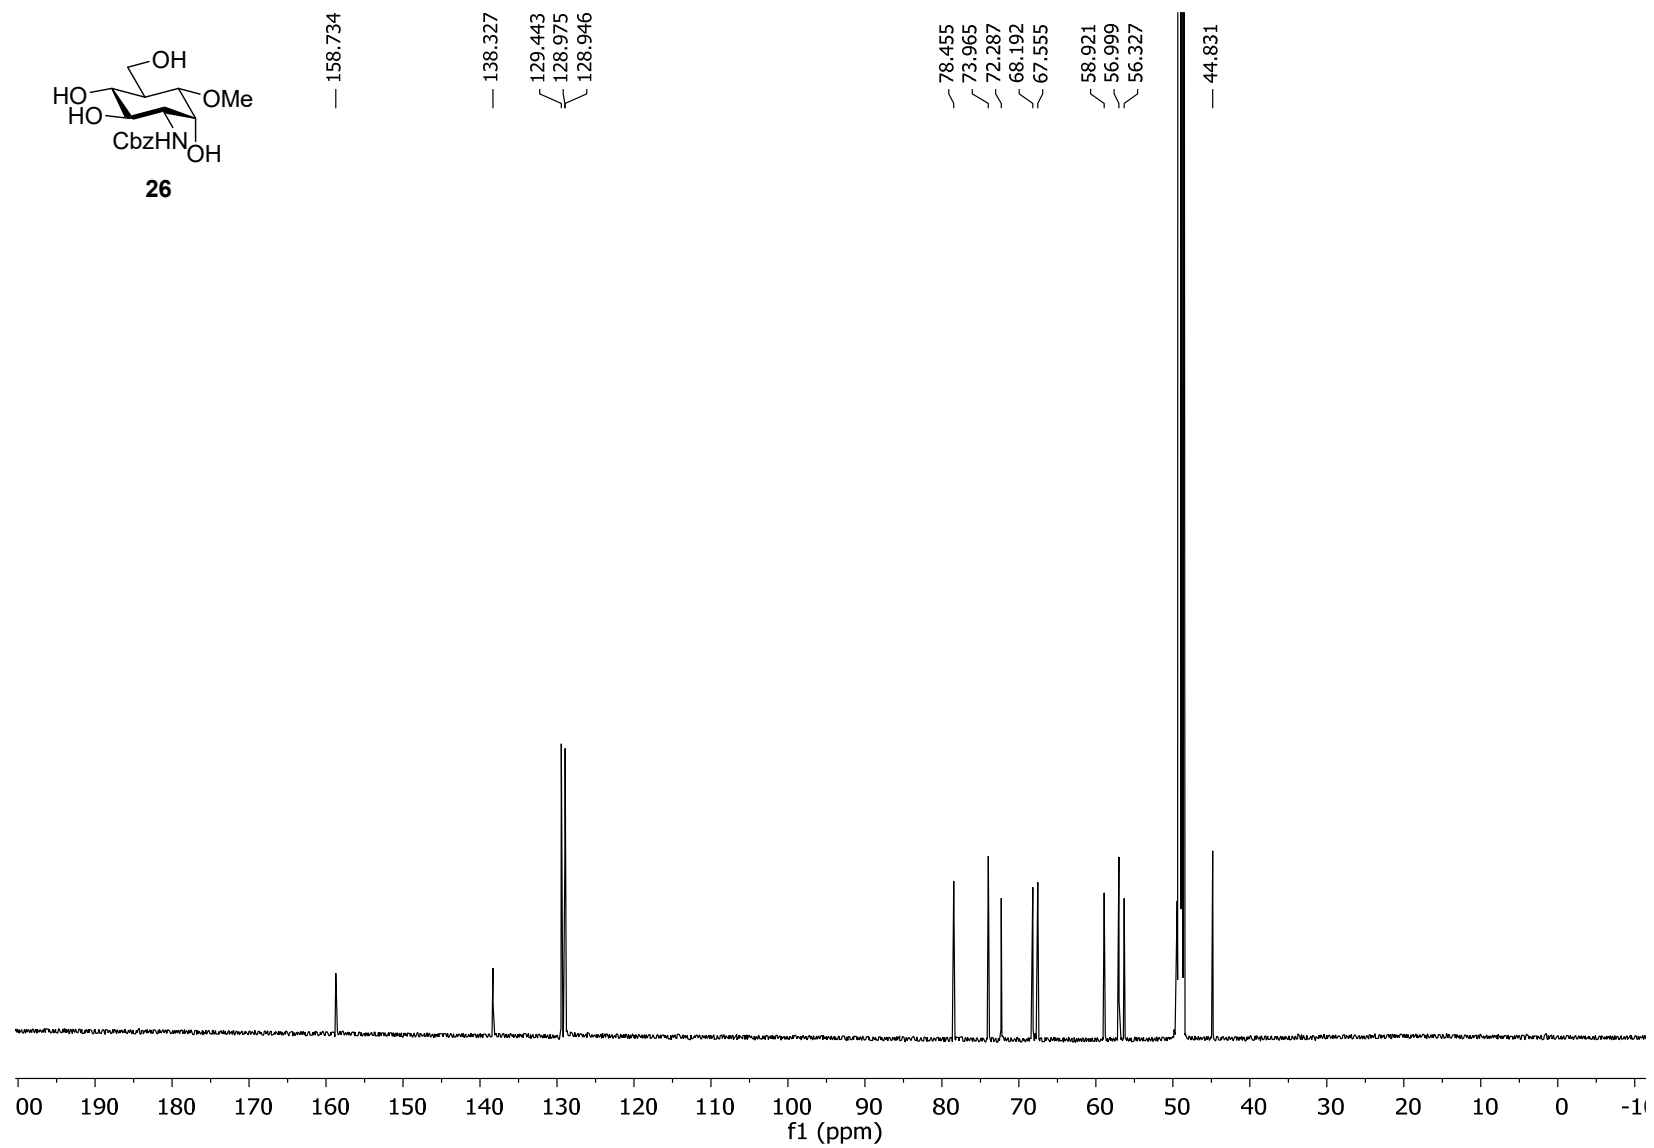

$^{13}\text{C}$  NMR spectrum (101 MHz,  $\text{CD}_3\text{OD}$ ) of **26**

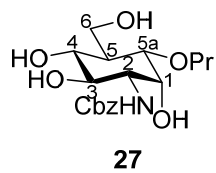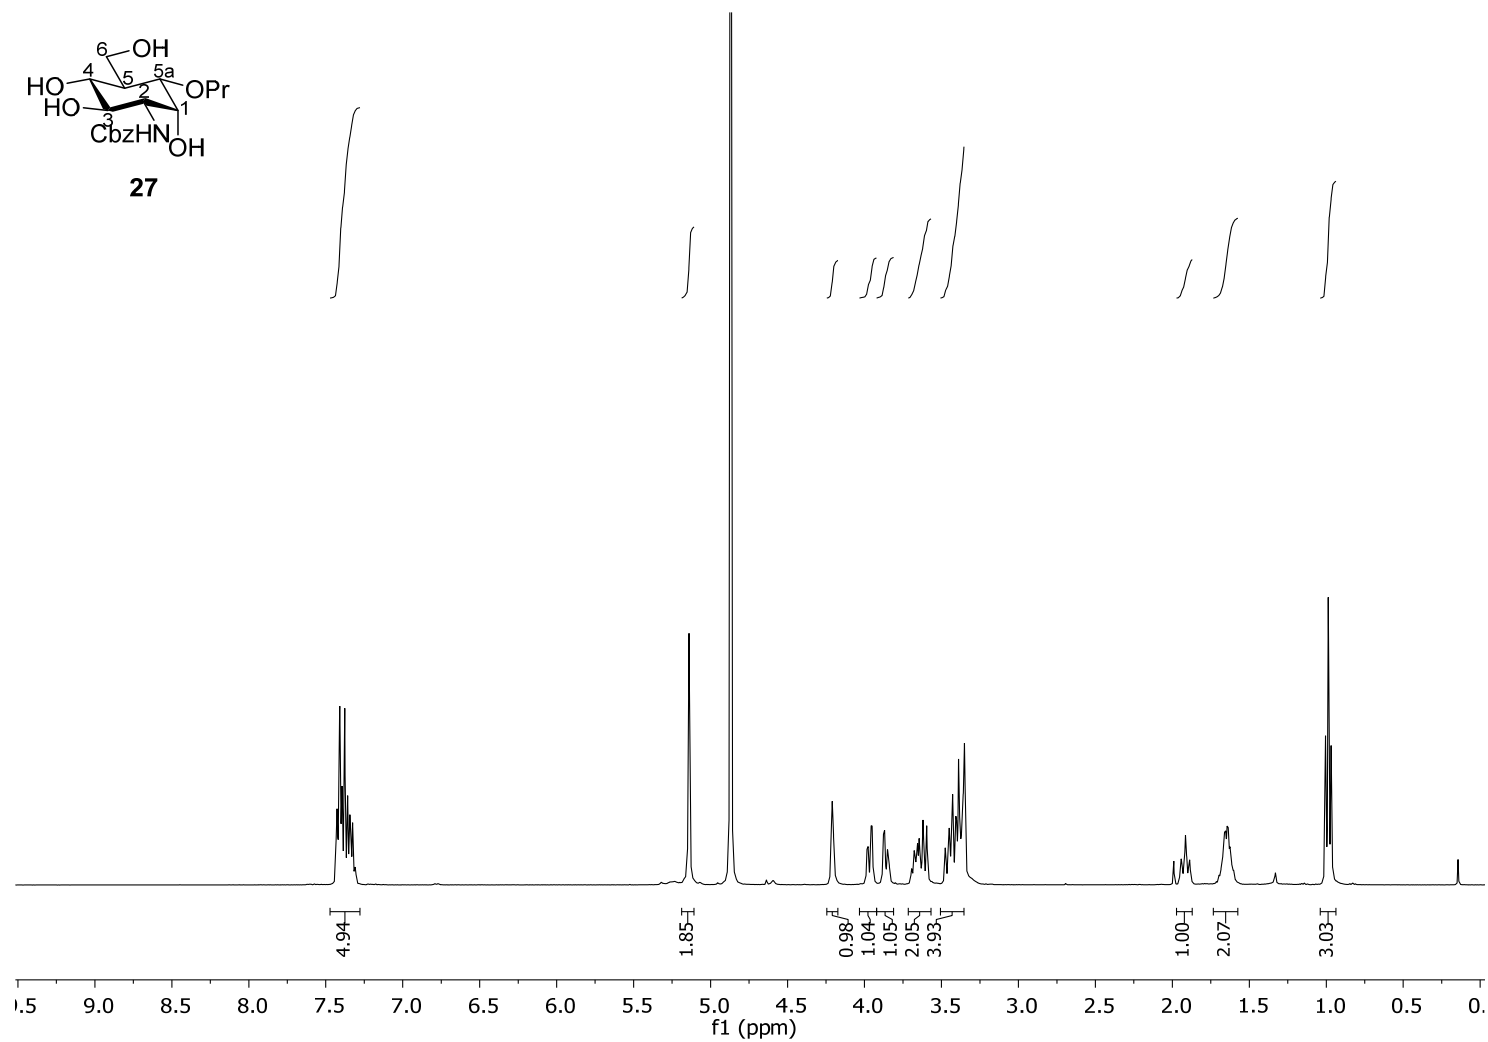

<sup>1</sup>H NMR spectrum (400 MHz, CD<sub>3</sub>OD) of **27**

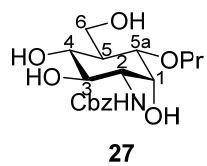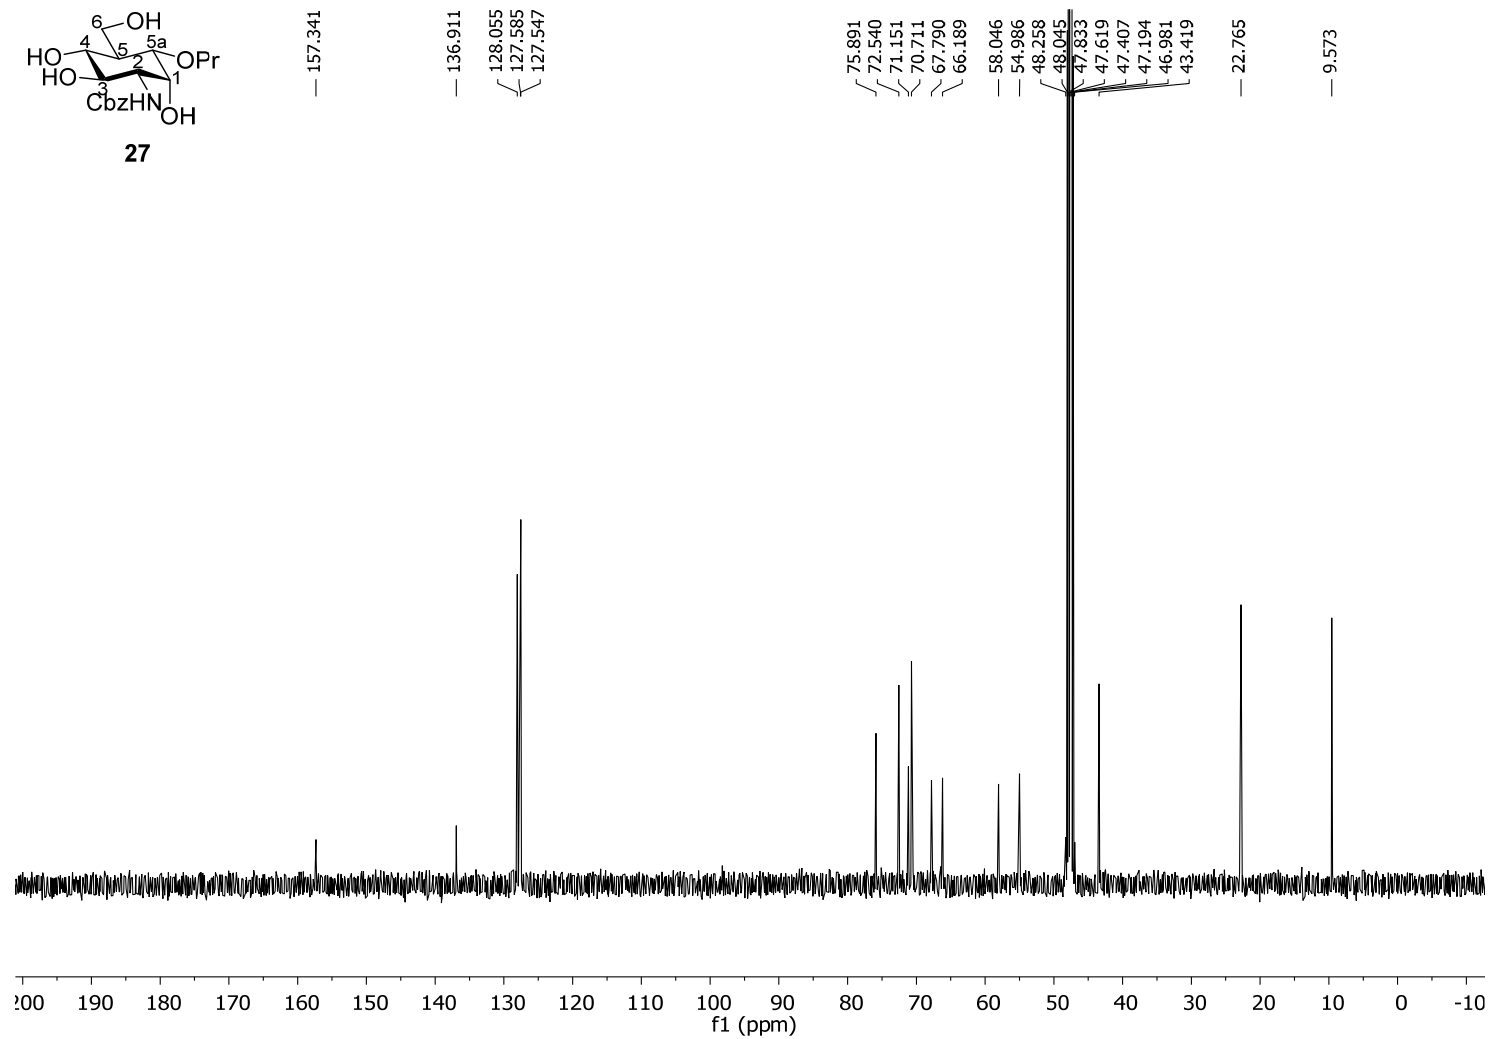

<sup>13</sup>C NMR spectrum (101 MHz, CD<sub>3</sub>OD) of **27**



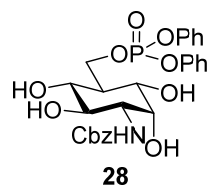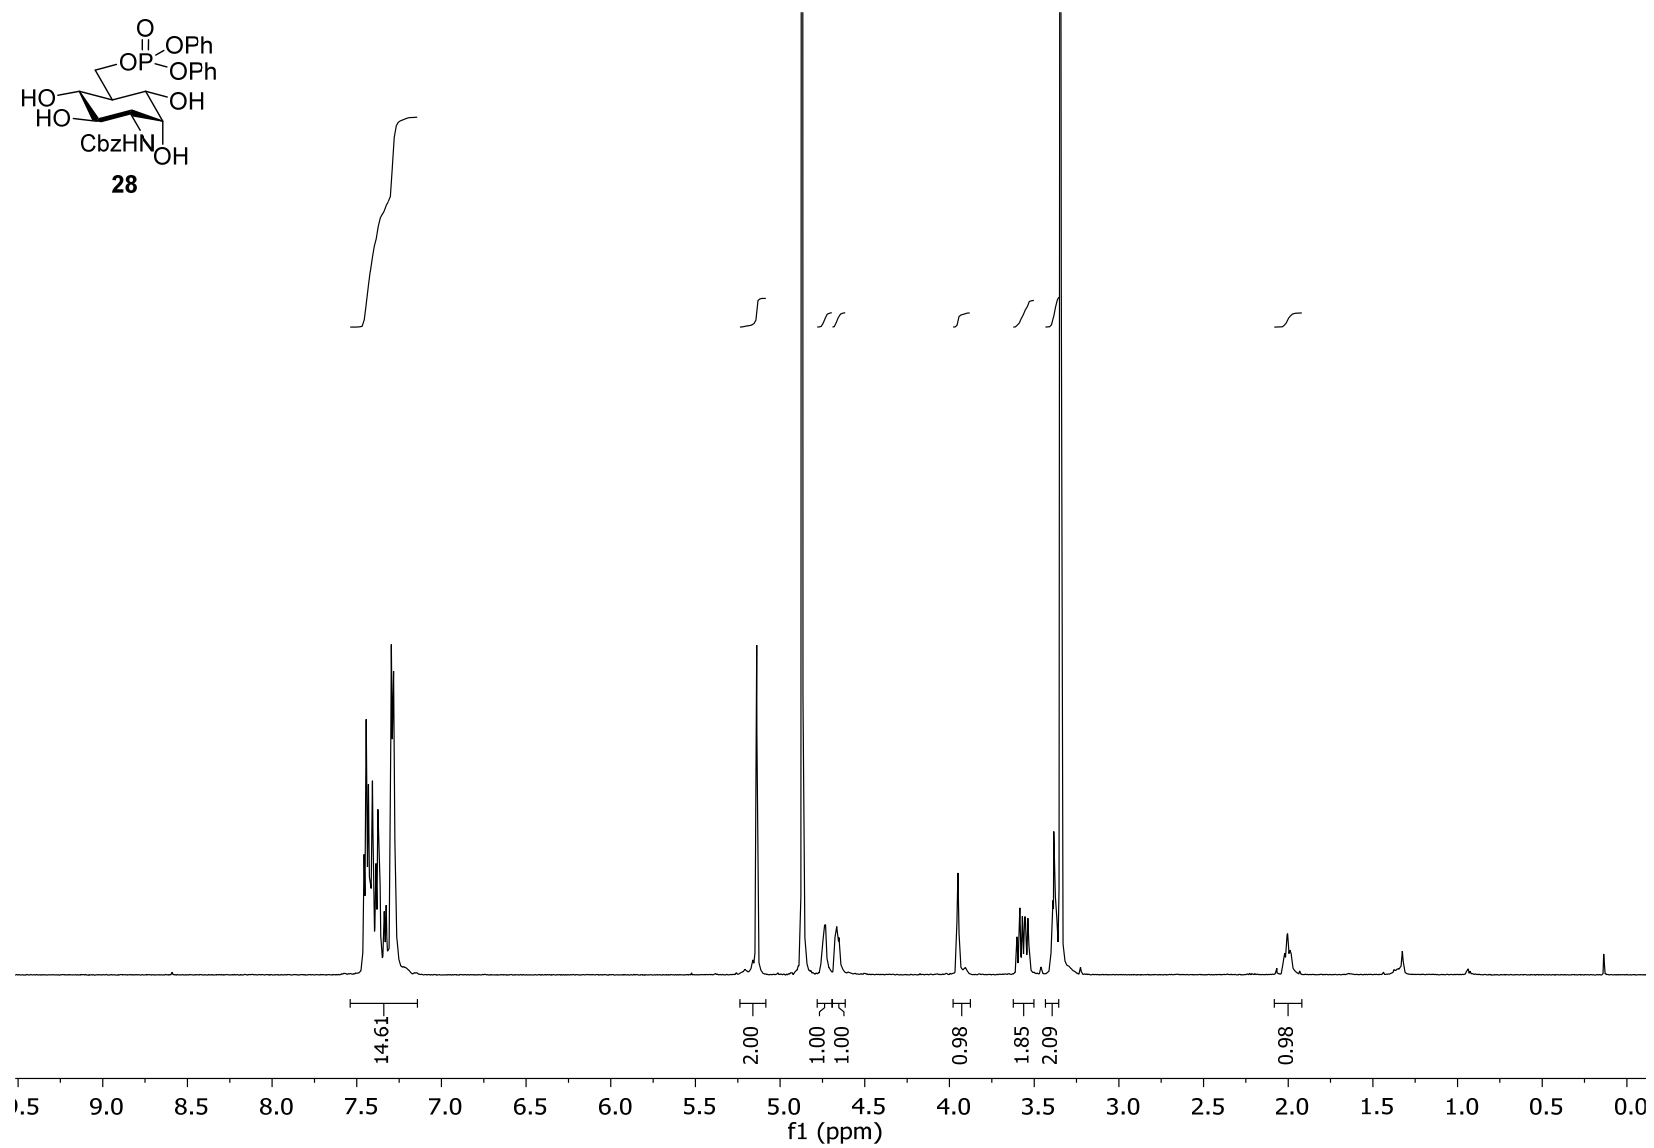

$^1\text{H}$  NMR spectrum (600 MHz,  $\text{CD}_3\text{OD}$ ) of **28**

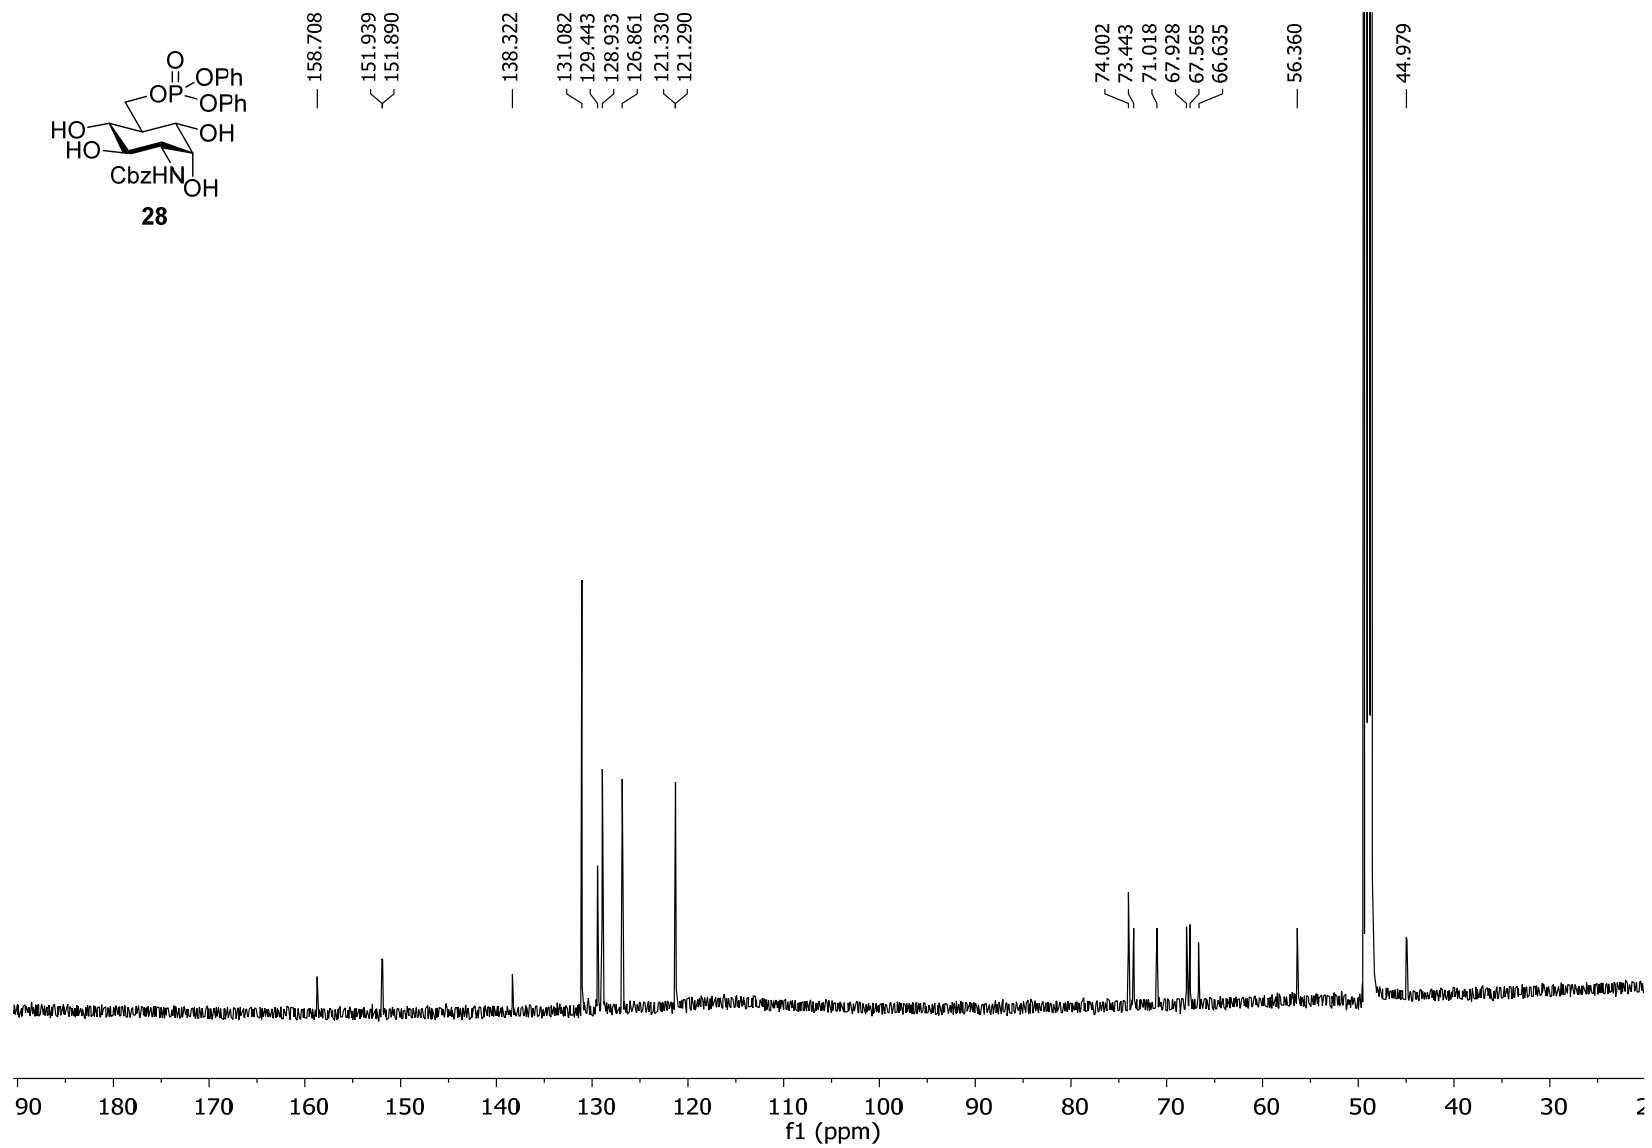

<sup>13</sup>C NMR spectrum (151 MHz, CD<sub>3</sub>OD) of **28**

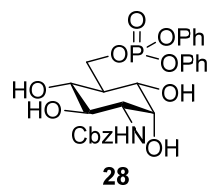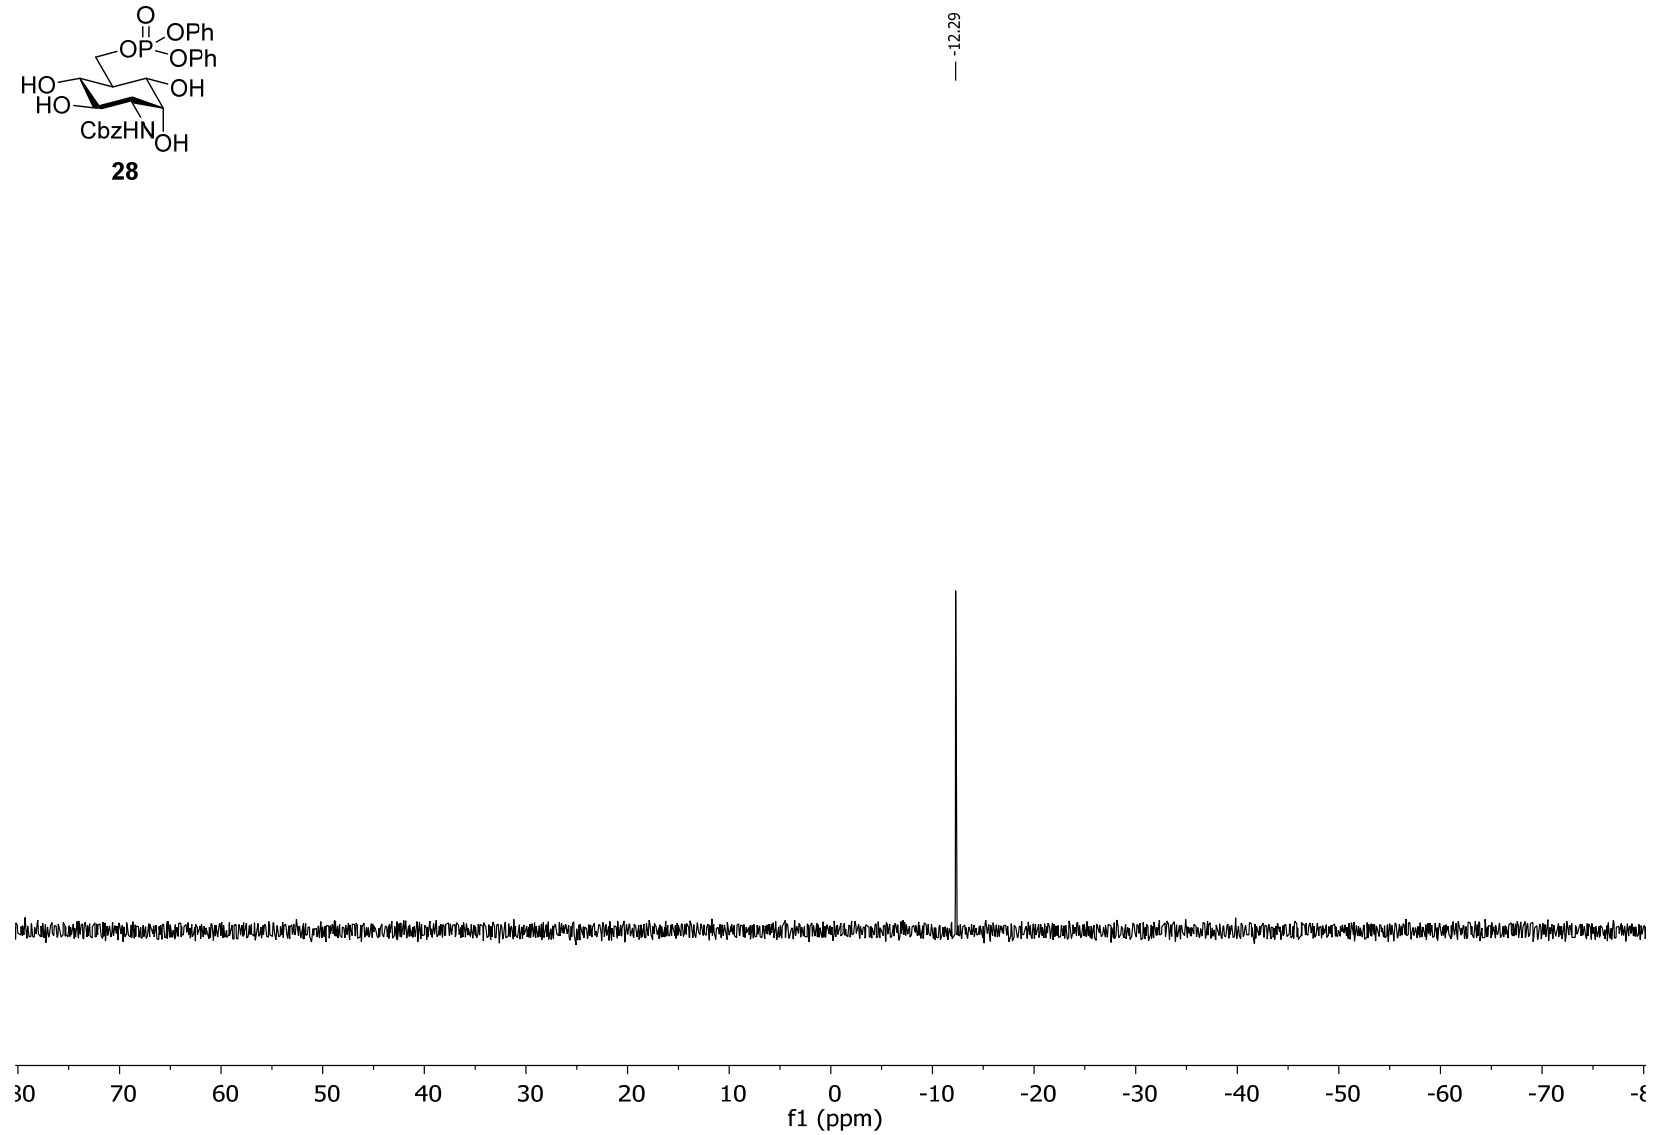

$^{31}\text{P}$  NMR spectrum (162 MHz,  $\text{CD}_3\text{OD}$ ) of **28**

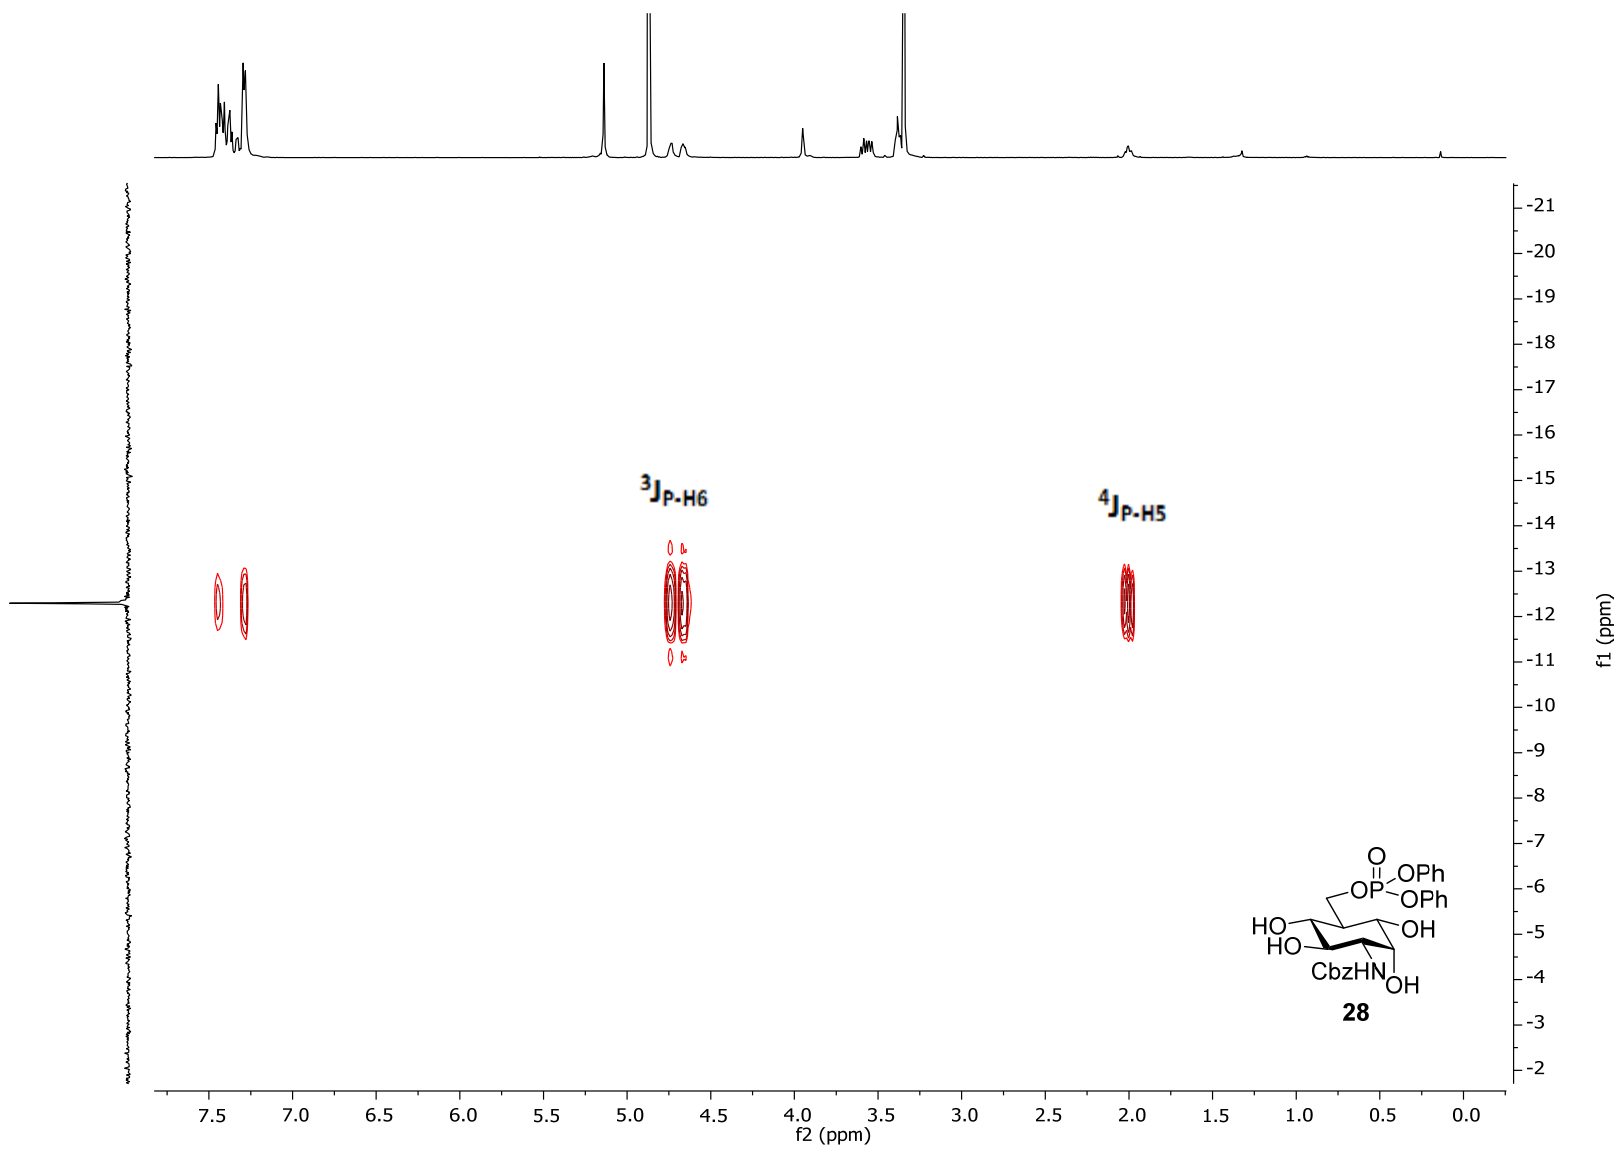

$^{31}\text{P}$ - $^1\text{H}$  HMBC NMR spectrum ( $\text{CD}_3\text{OD}$ ) of **28**

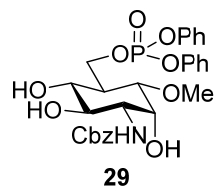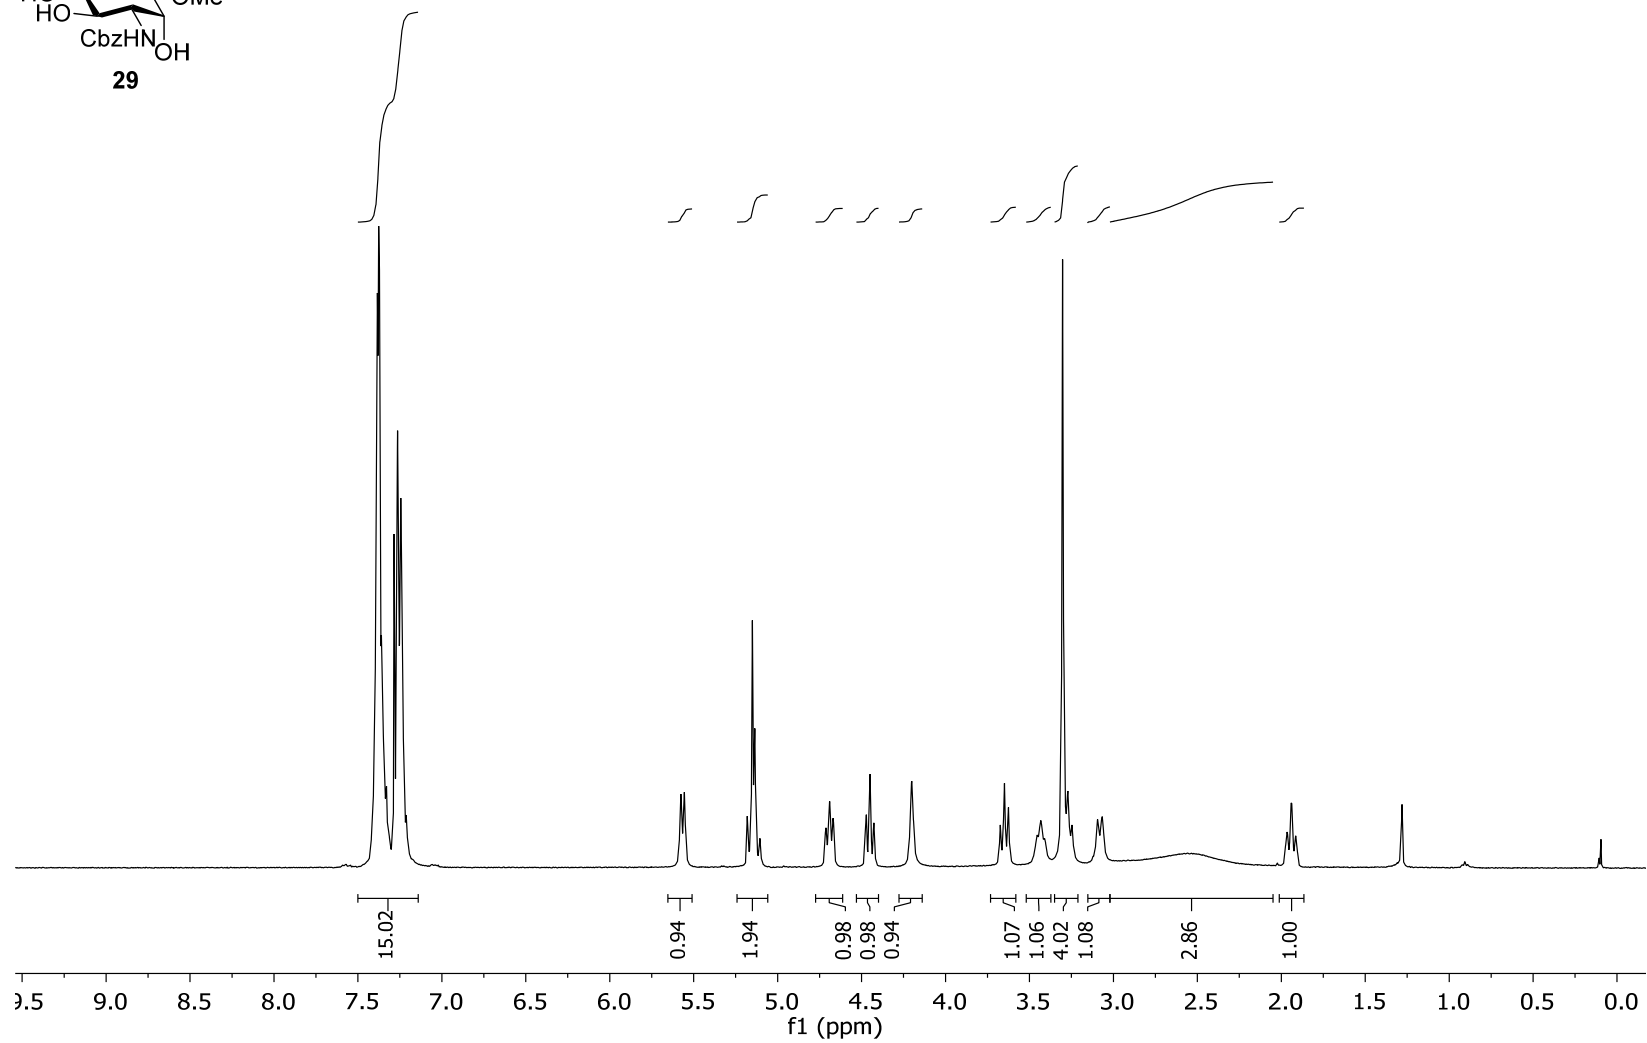

$^1\text{H}$  NMR spectrum (400 MHz,  $\text{CDCl}_3$ ) of **29**

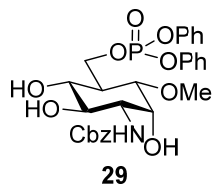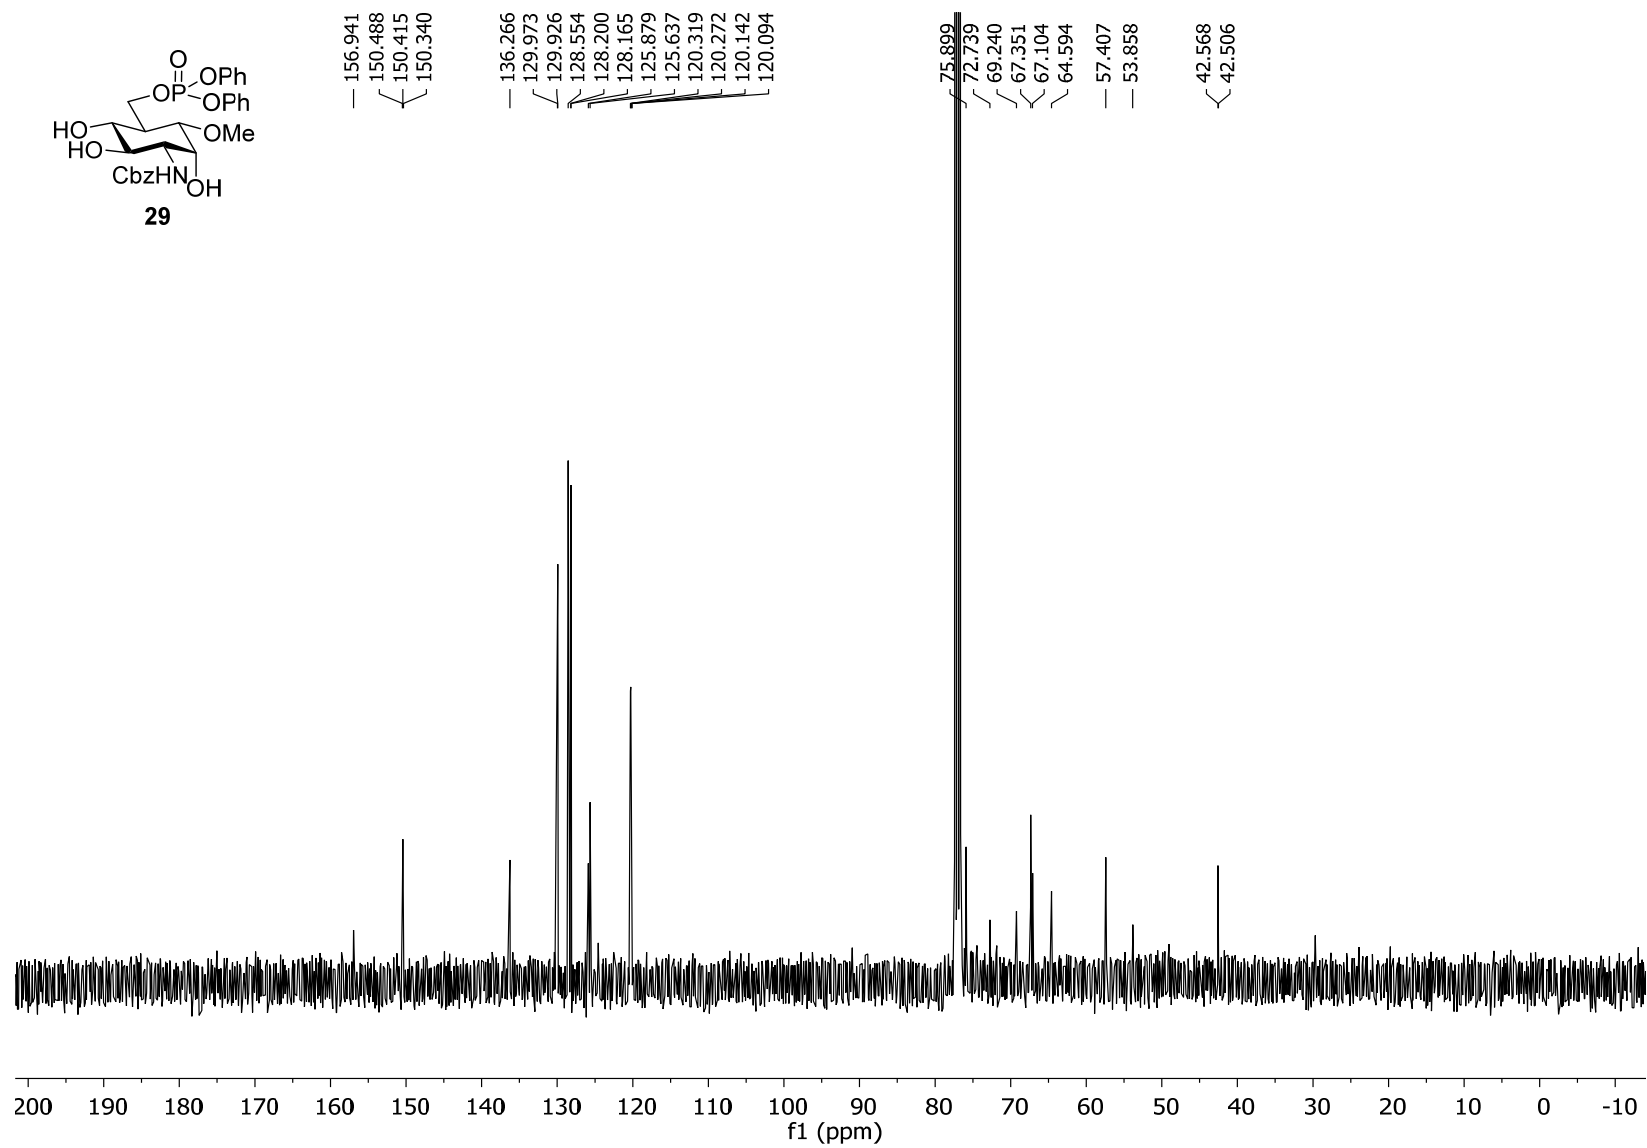

$^{13}\text{C}$  NMR spectrum (101 MHz,  $\text{CDCl}_3$ ) of **29**

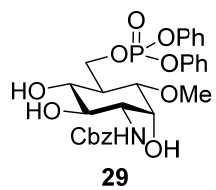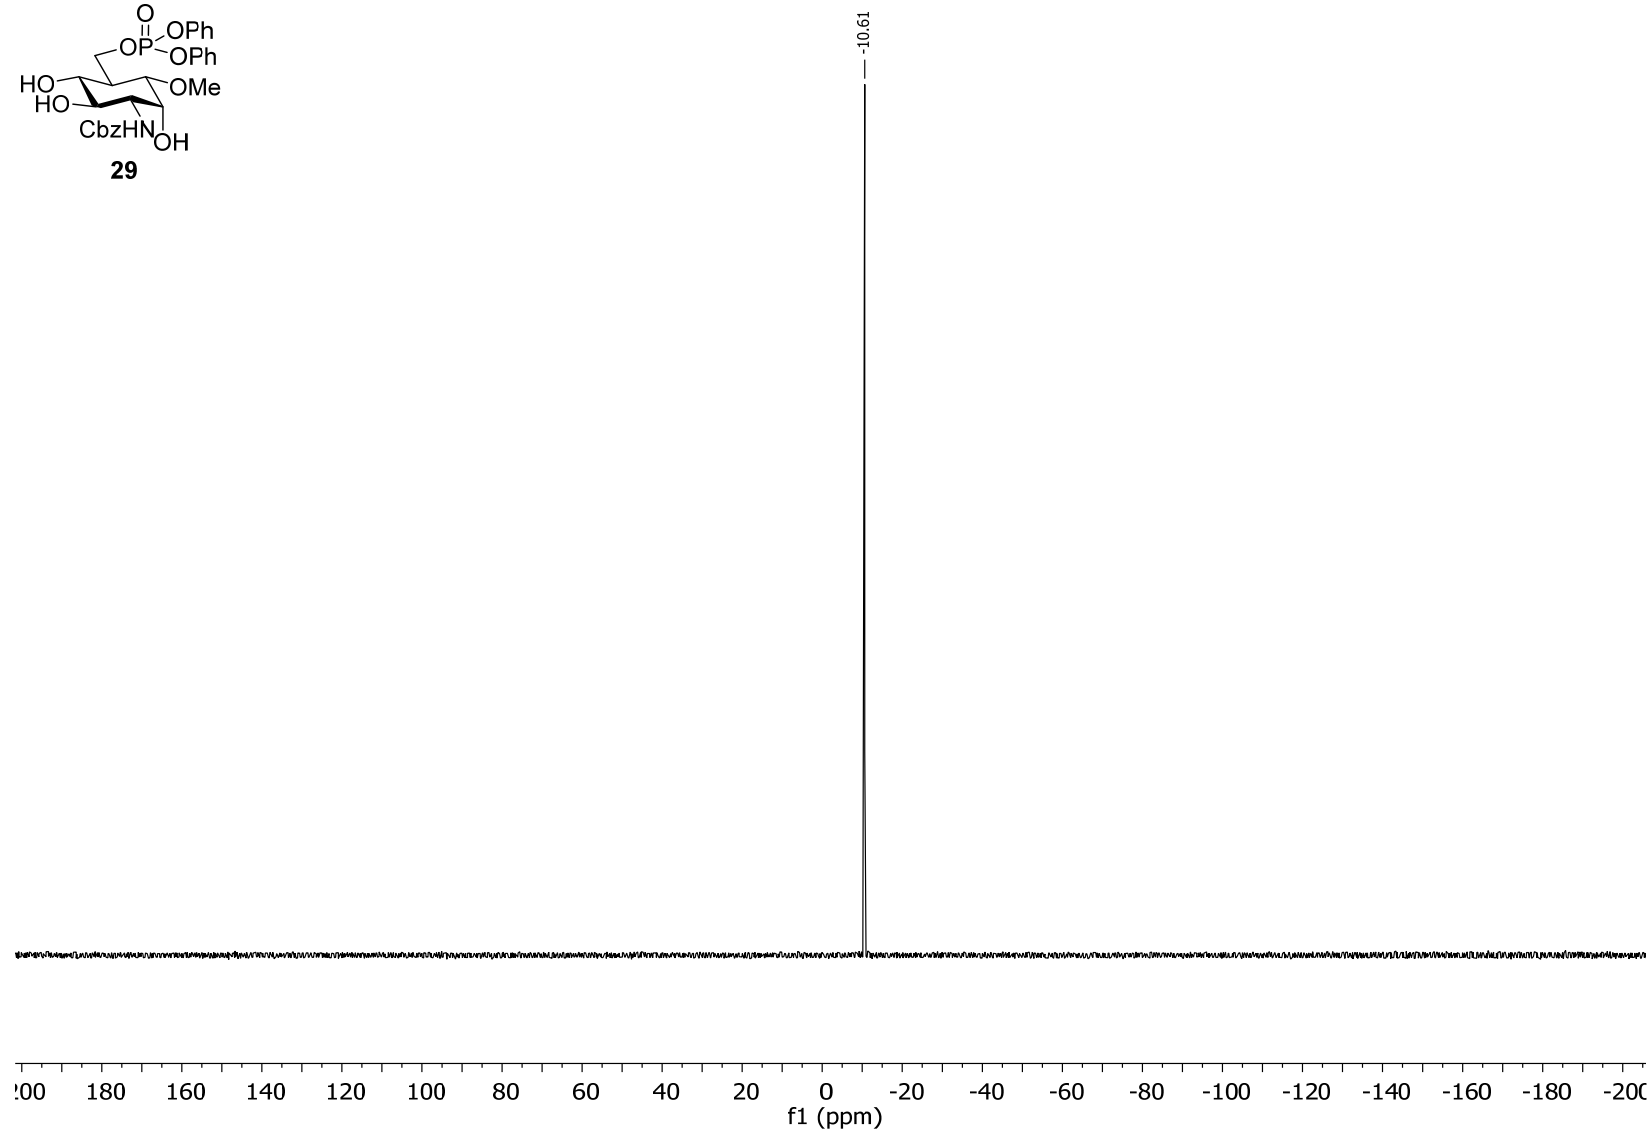

$^{31}\text{P}$  NMR spectrum (162 MHz,  $\text{CDCl}_3$ ) of **29**

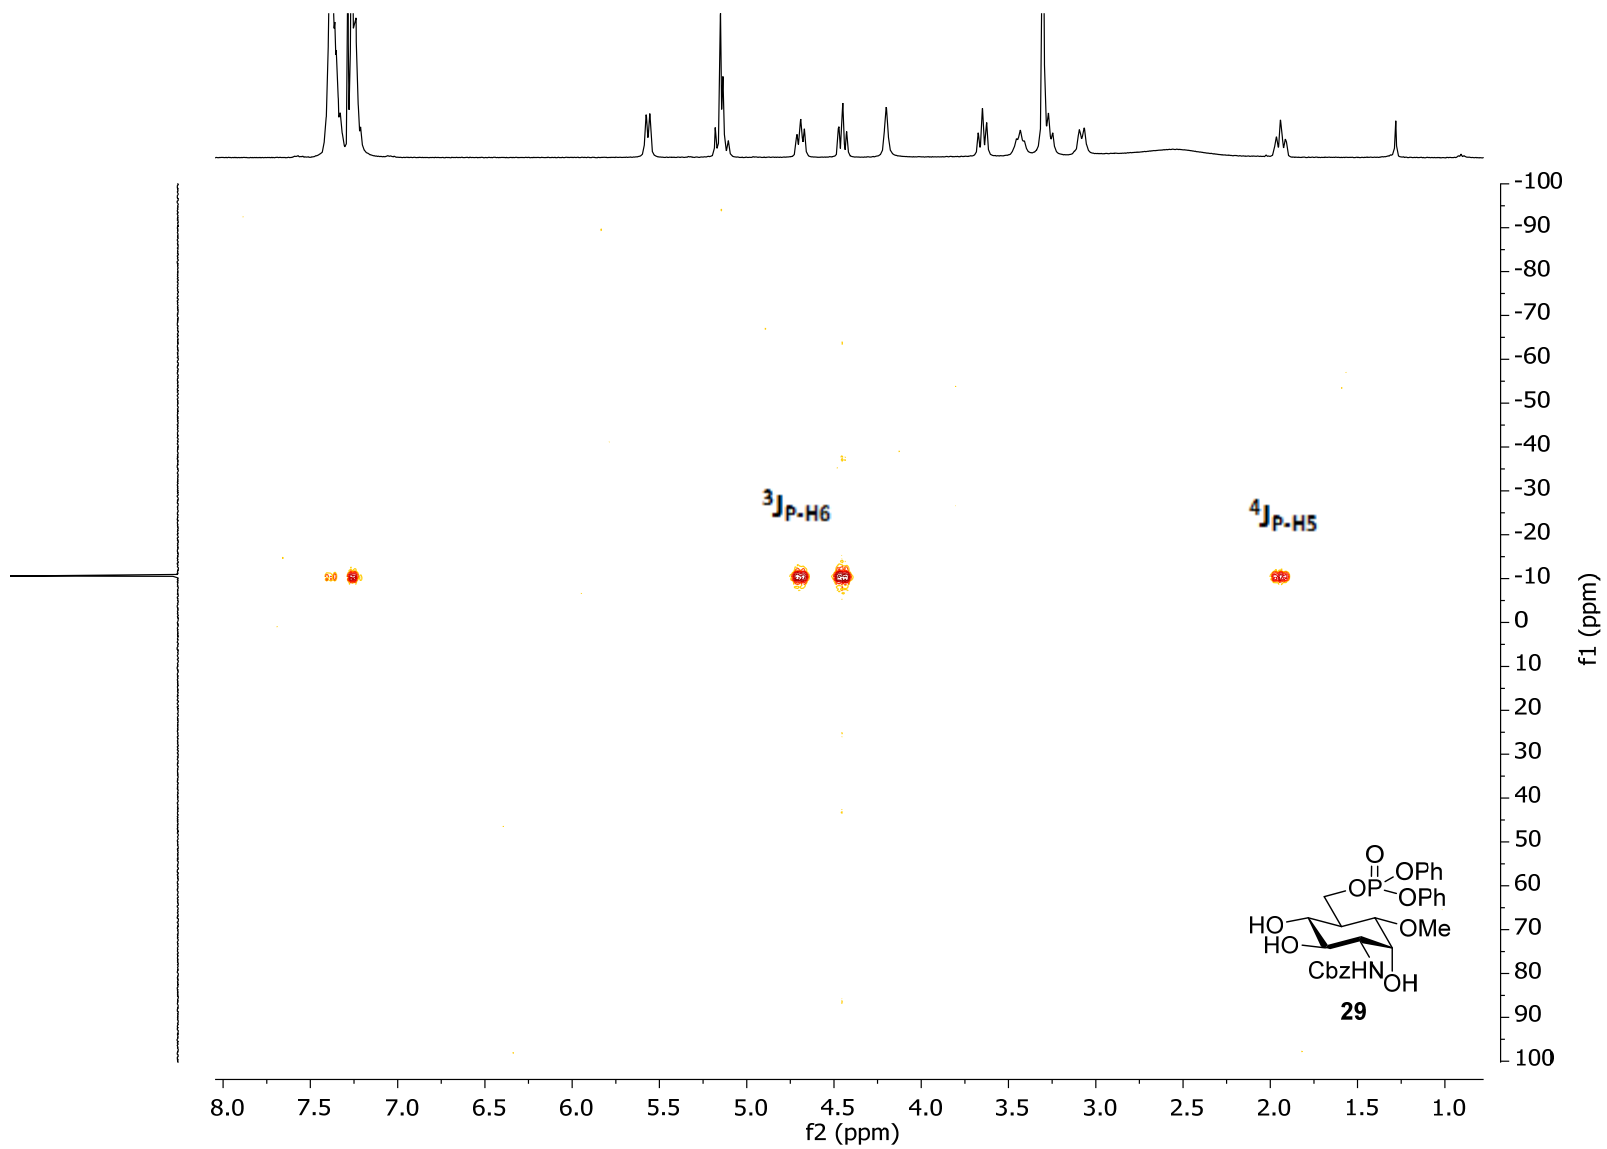

$^{31}\text{P}$ - $^1\text{H}$  HMBC NMR spectrum ( $\text{CDCl}_3$ ) of **29**



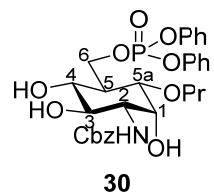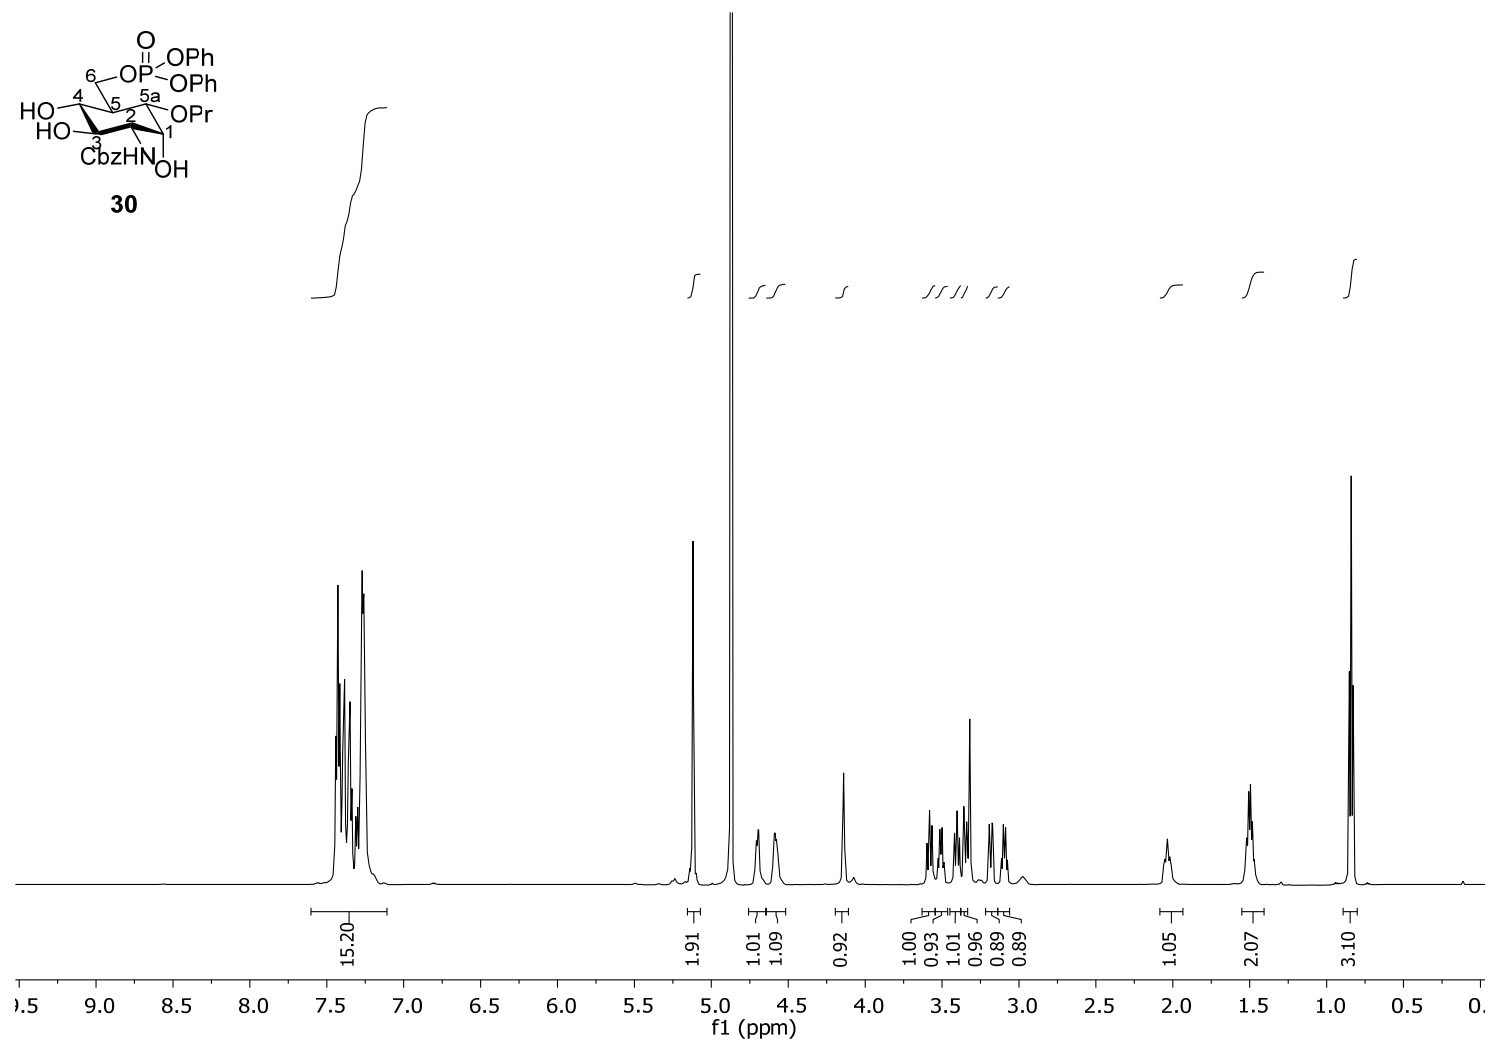

$^1\text{H}$  NMR spectrum (400 MHz,  $\text{CD}_3\text{OD}$ ) of **30**

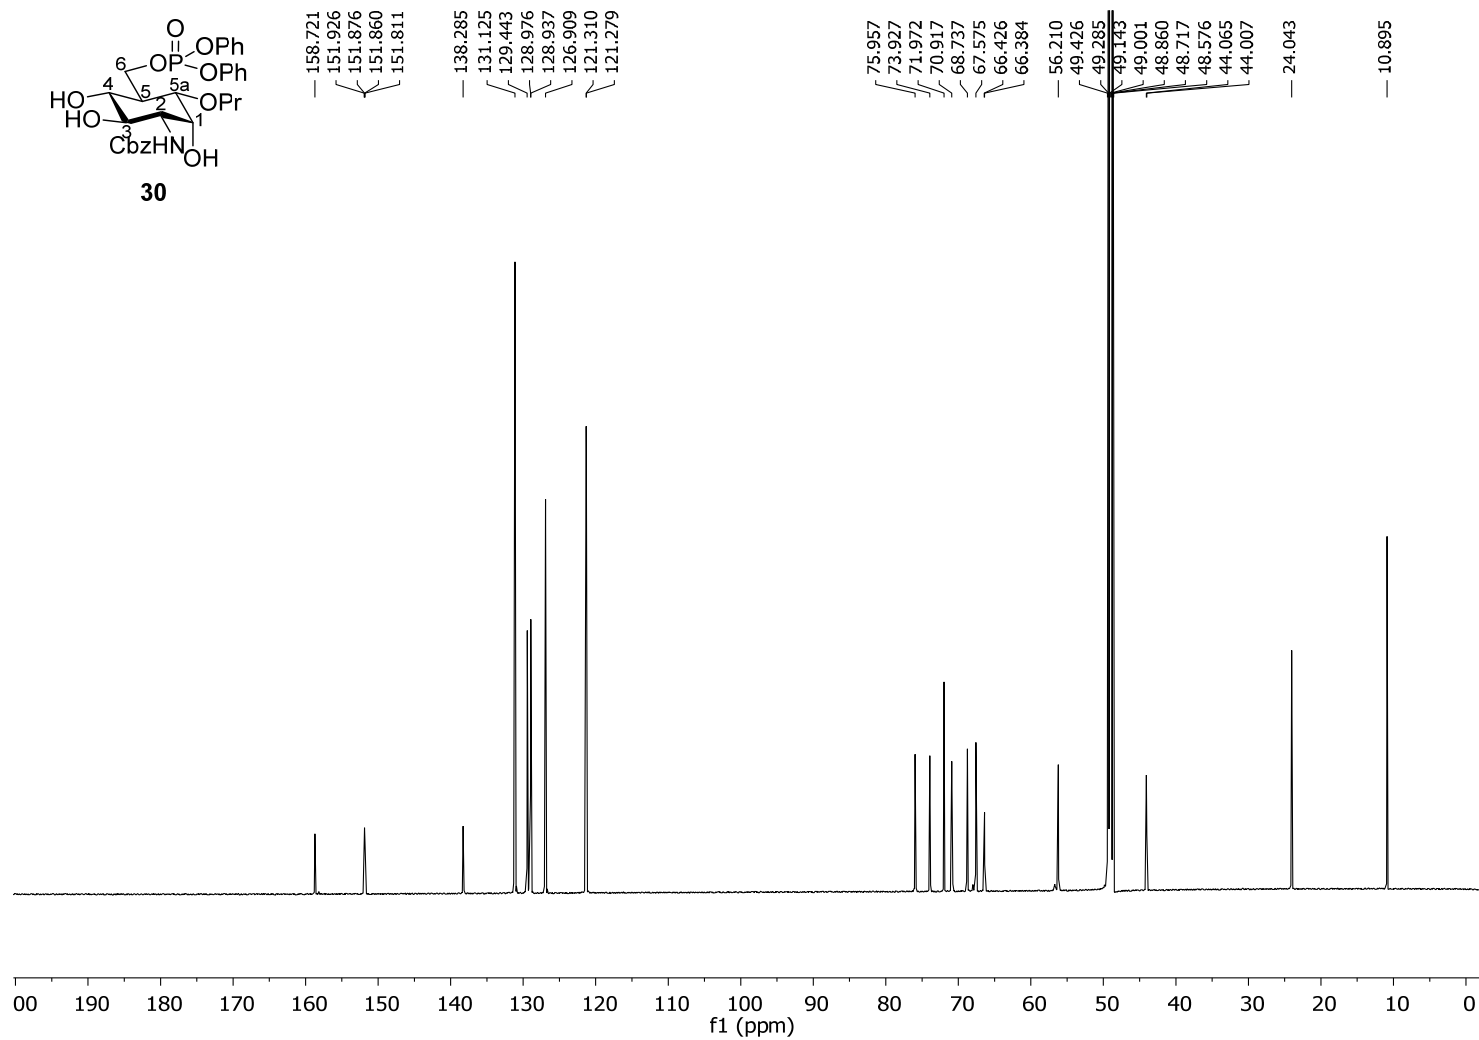

<sup>13</sup>C NMR spectrum (101 MHz, CD<sub>3</sub>OD) of **30**

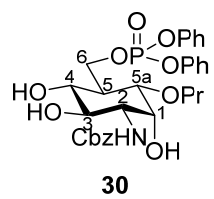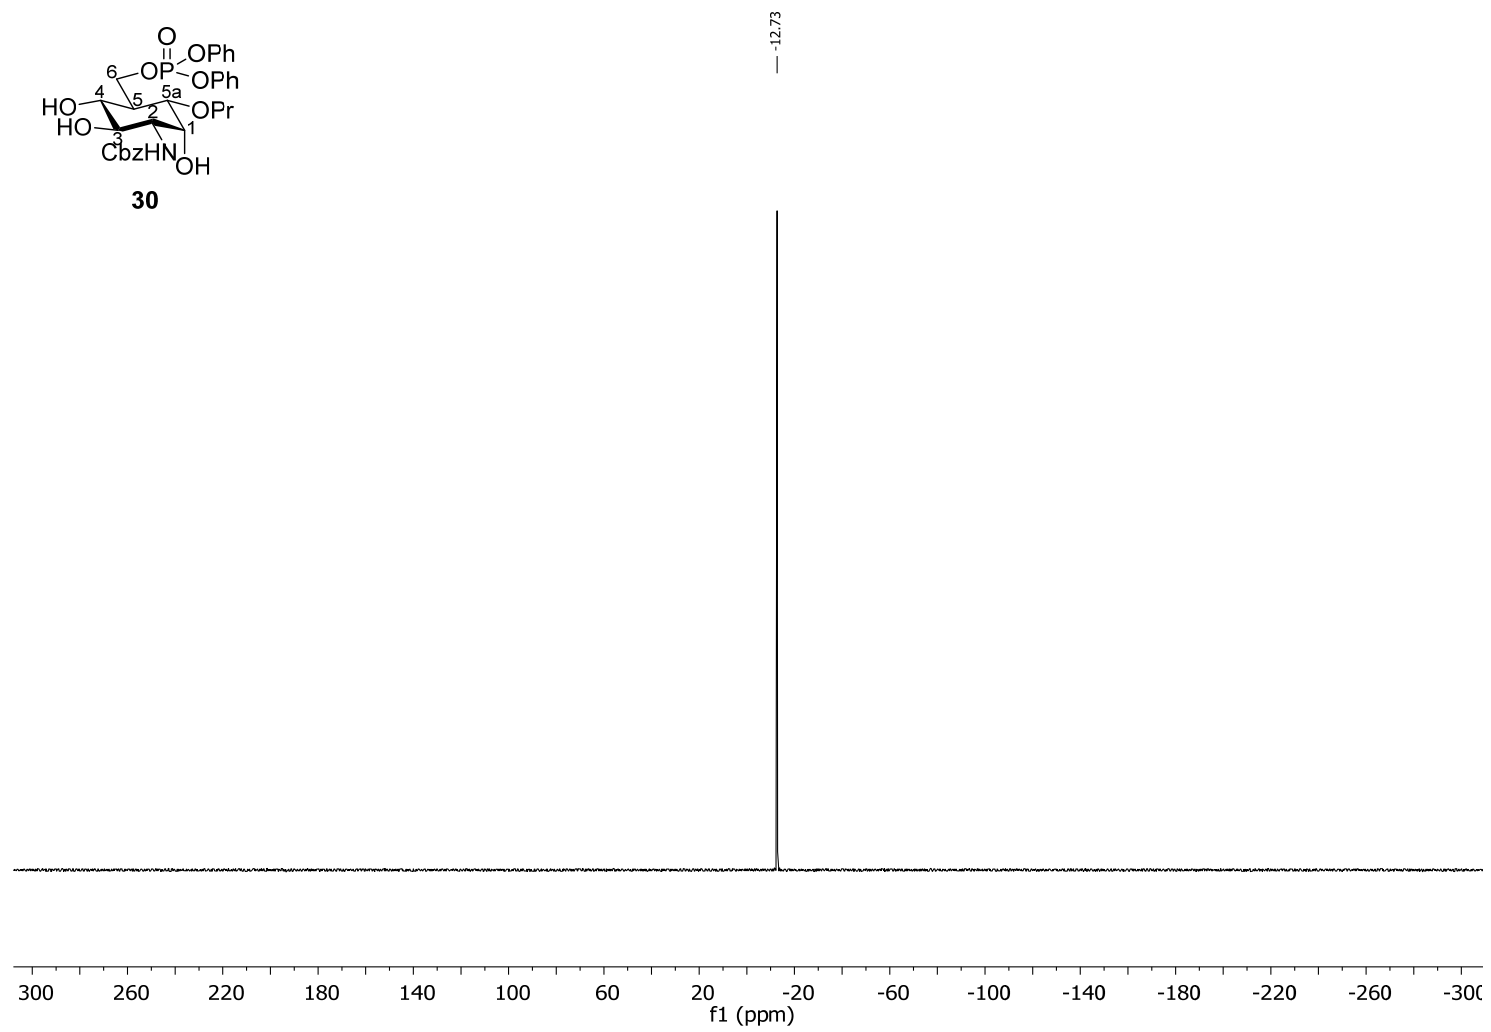

$^{31}\text{P}$  NMR spectrum (162 MHz,  $\text{CD}_3\text{OD}$ ) of **30**

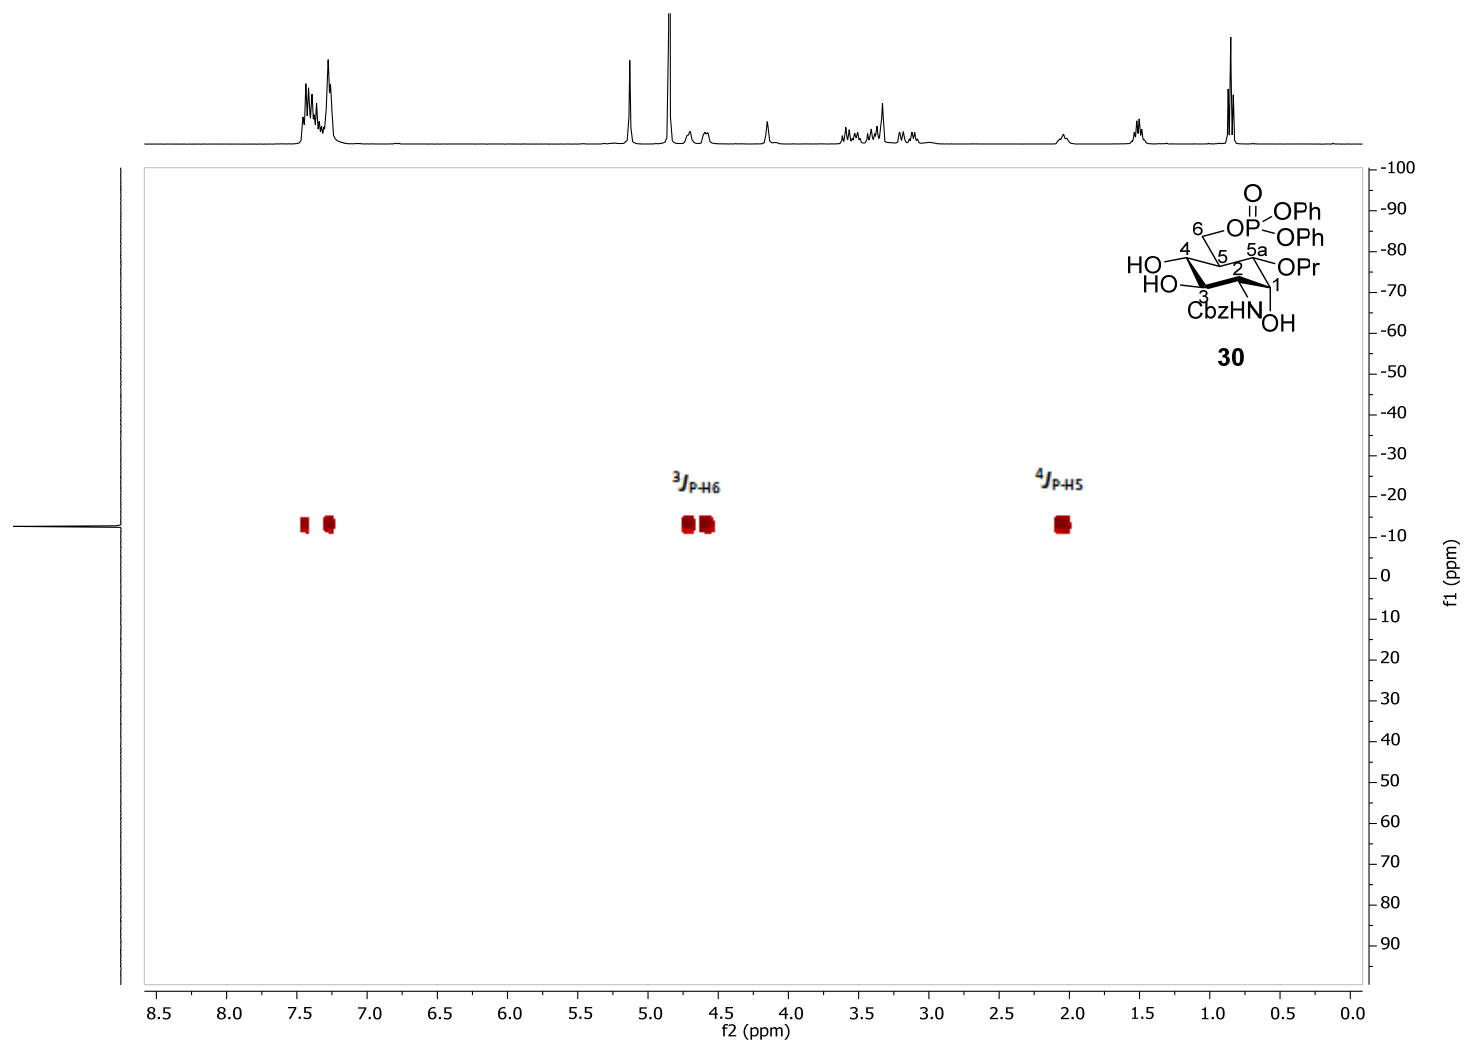

$^{31}\text{P}$ - $^1\text{H}$  HMBC NMR spectrum ( $\text{CD}_3\text{OD}$ ) of **30**

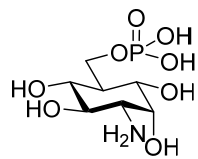

**31**

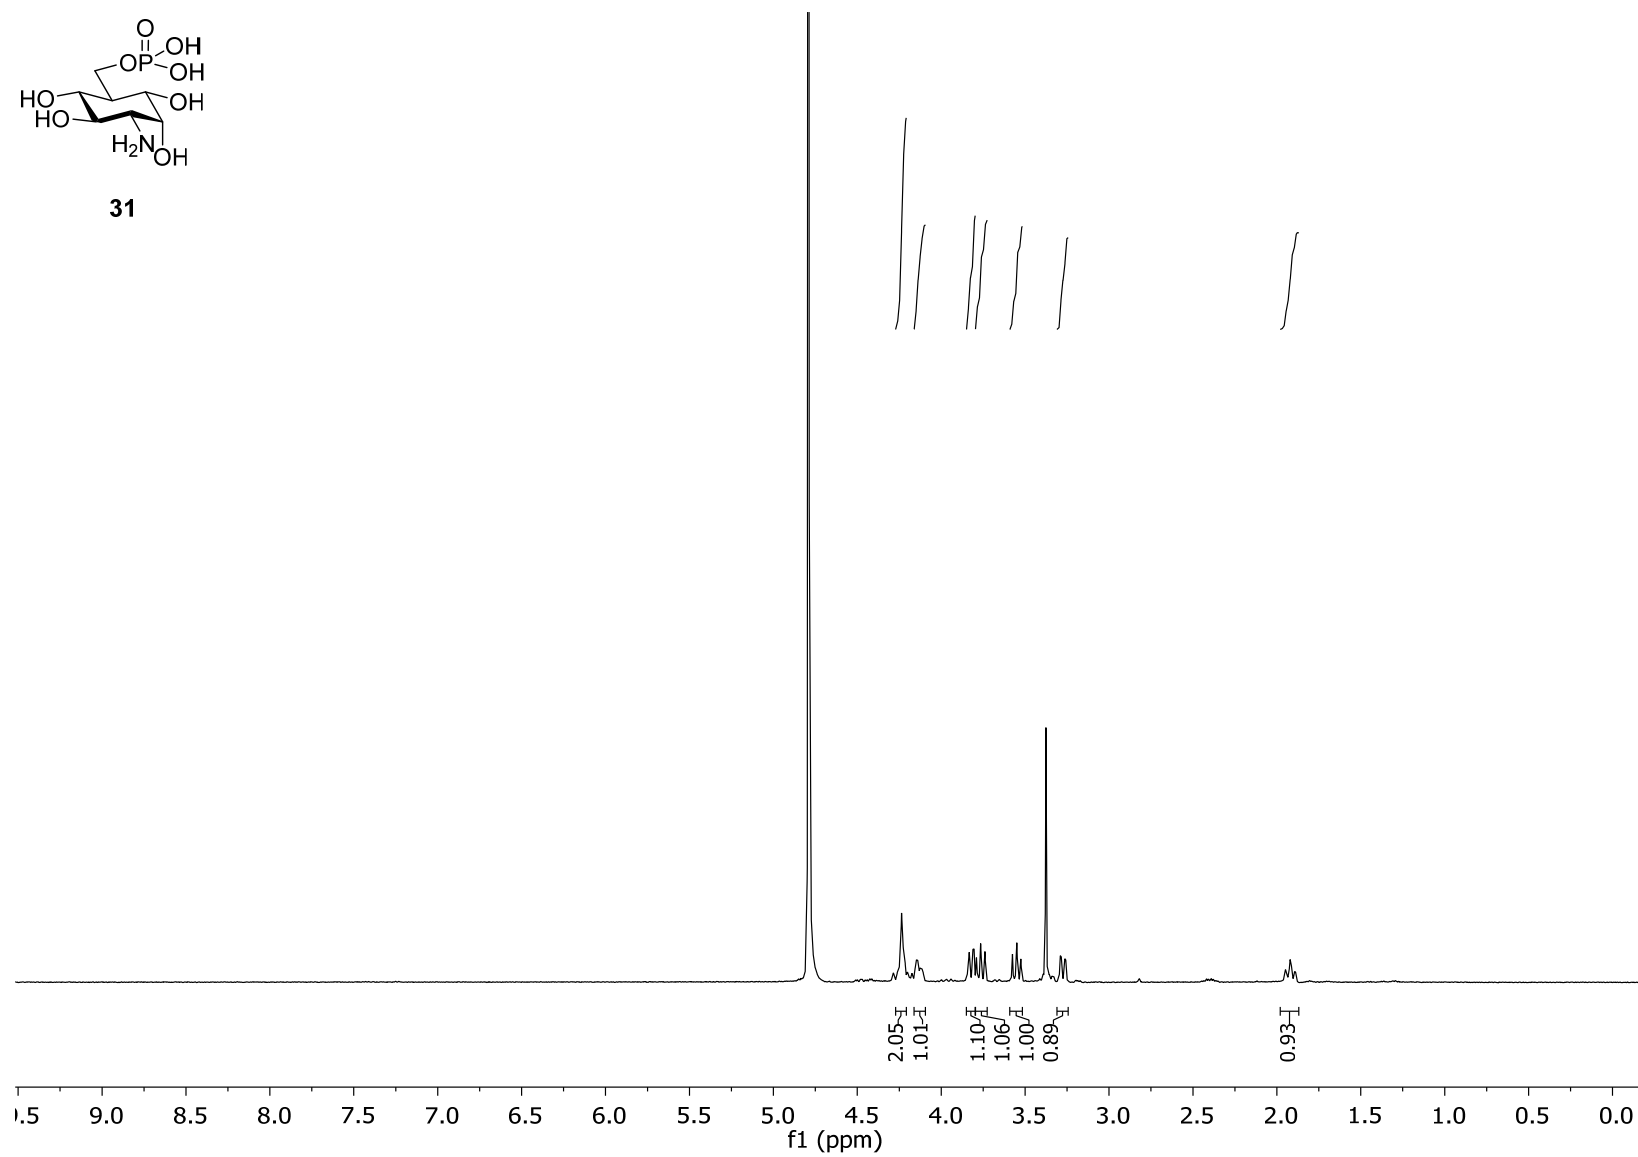

$^1\text{H}$  NMR spectrum (400 MHz,  $\text{D}_2\text{O}$ ) of **31**

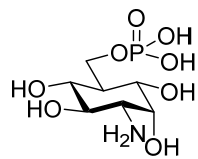

**31**

70.574  
69.200  
68.838  
66.127  
60.012  
59.979  
— 53.590  
43.190  
43.136

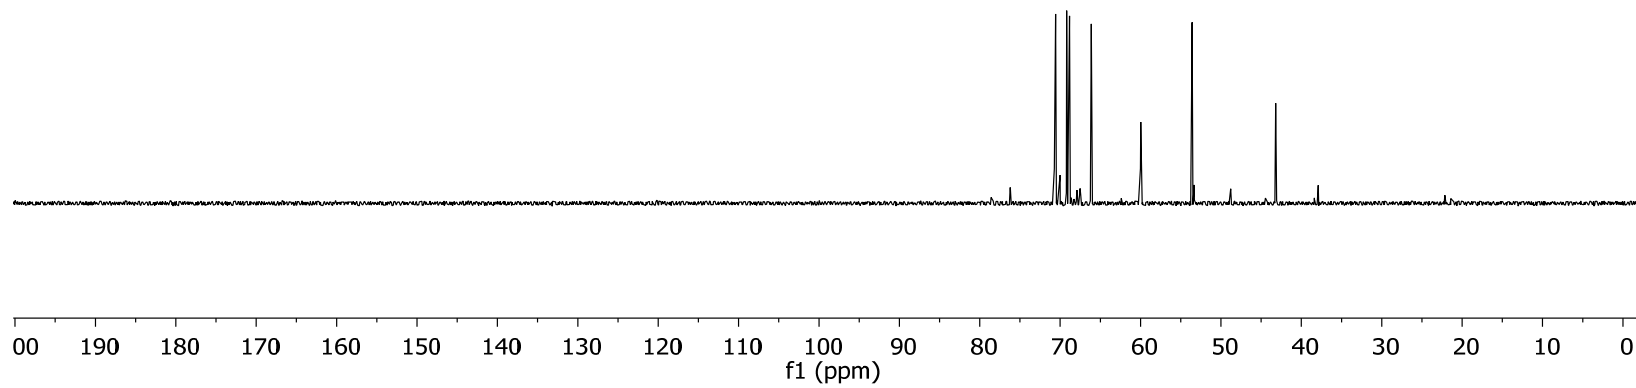

$^{13}\text{C}$  NMR spectrum (151 MHz,  $\text{D}_2\text{O}$ ) of **31**

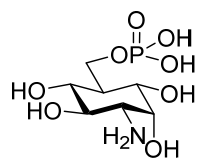

**31**

— 0.12

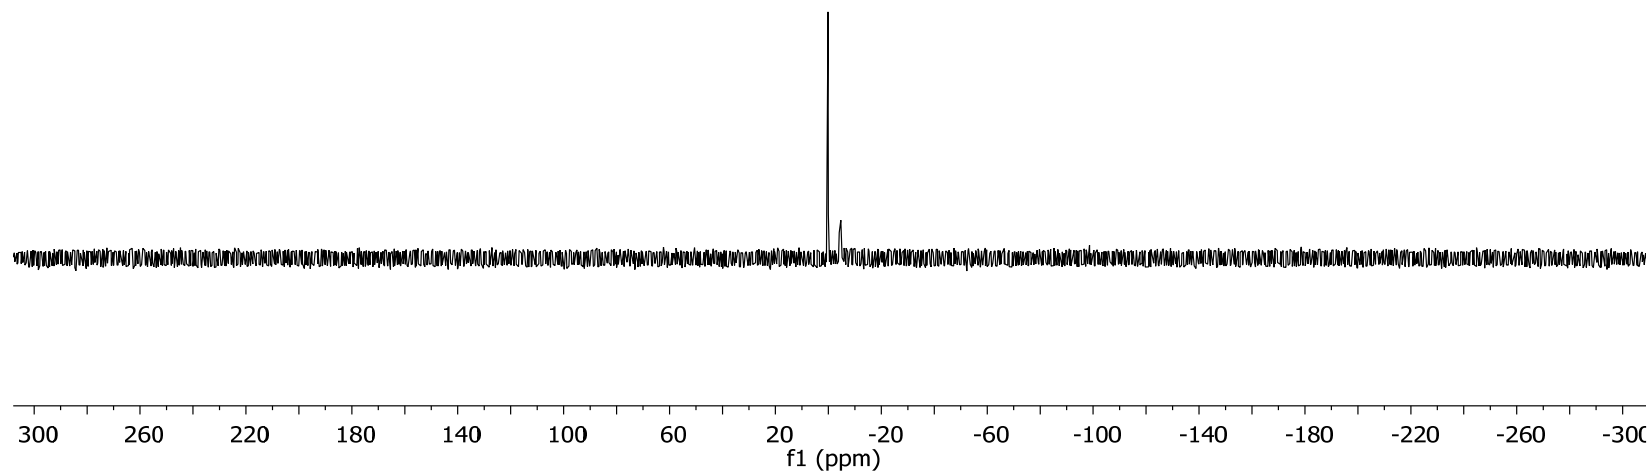

$^{31}\text{P}$  NMR spectrum (CDCl<sub>3</sub>) of **31**

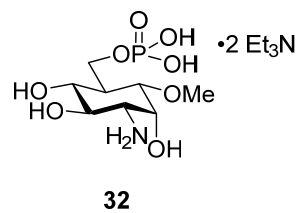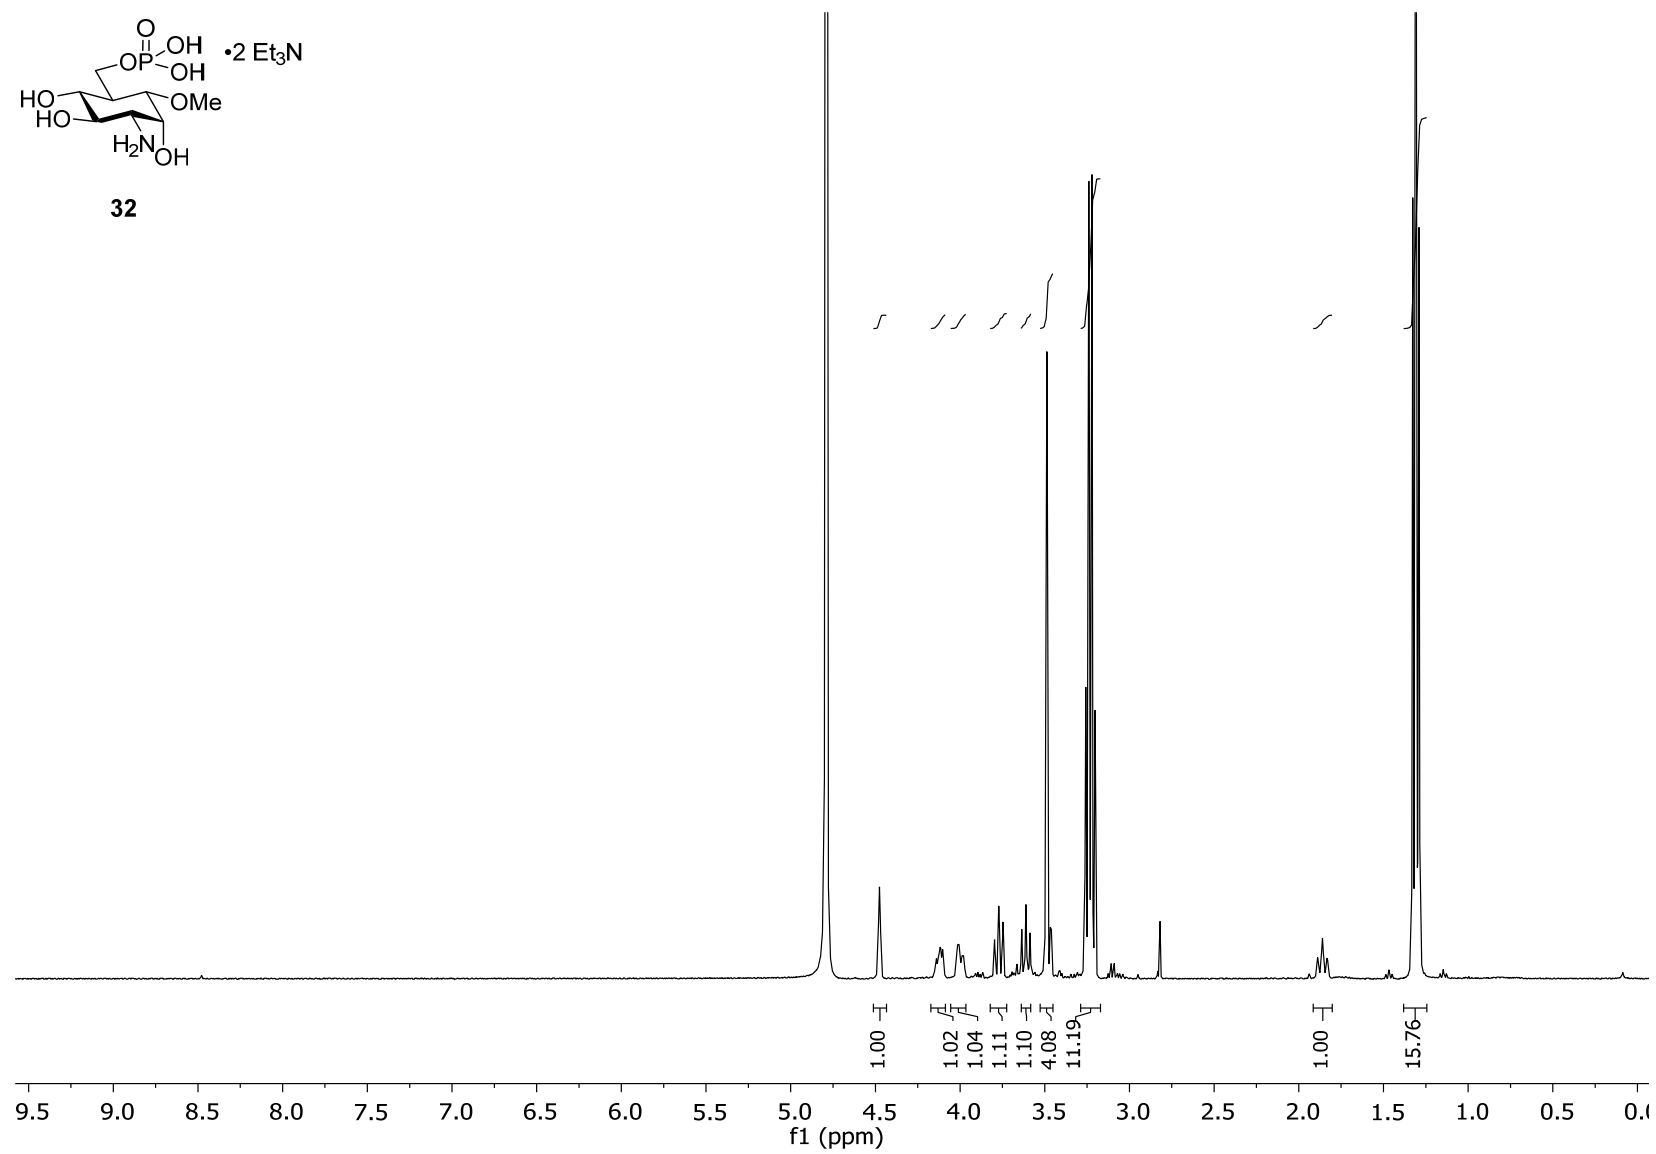

$^1\text{H}$  NMR spectrum (400 MHz,  $\text{D}_2\text{O}$ ) of **32**



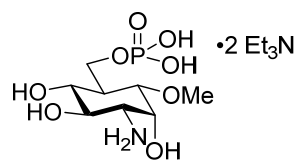

**32**

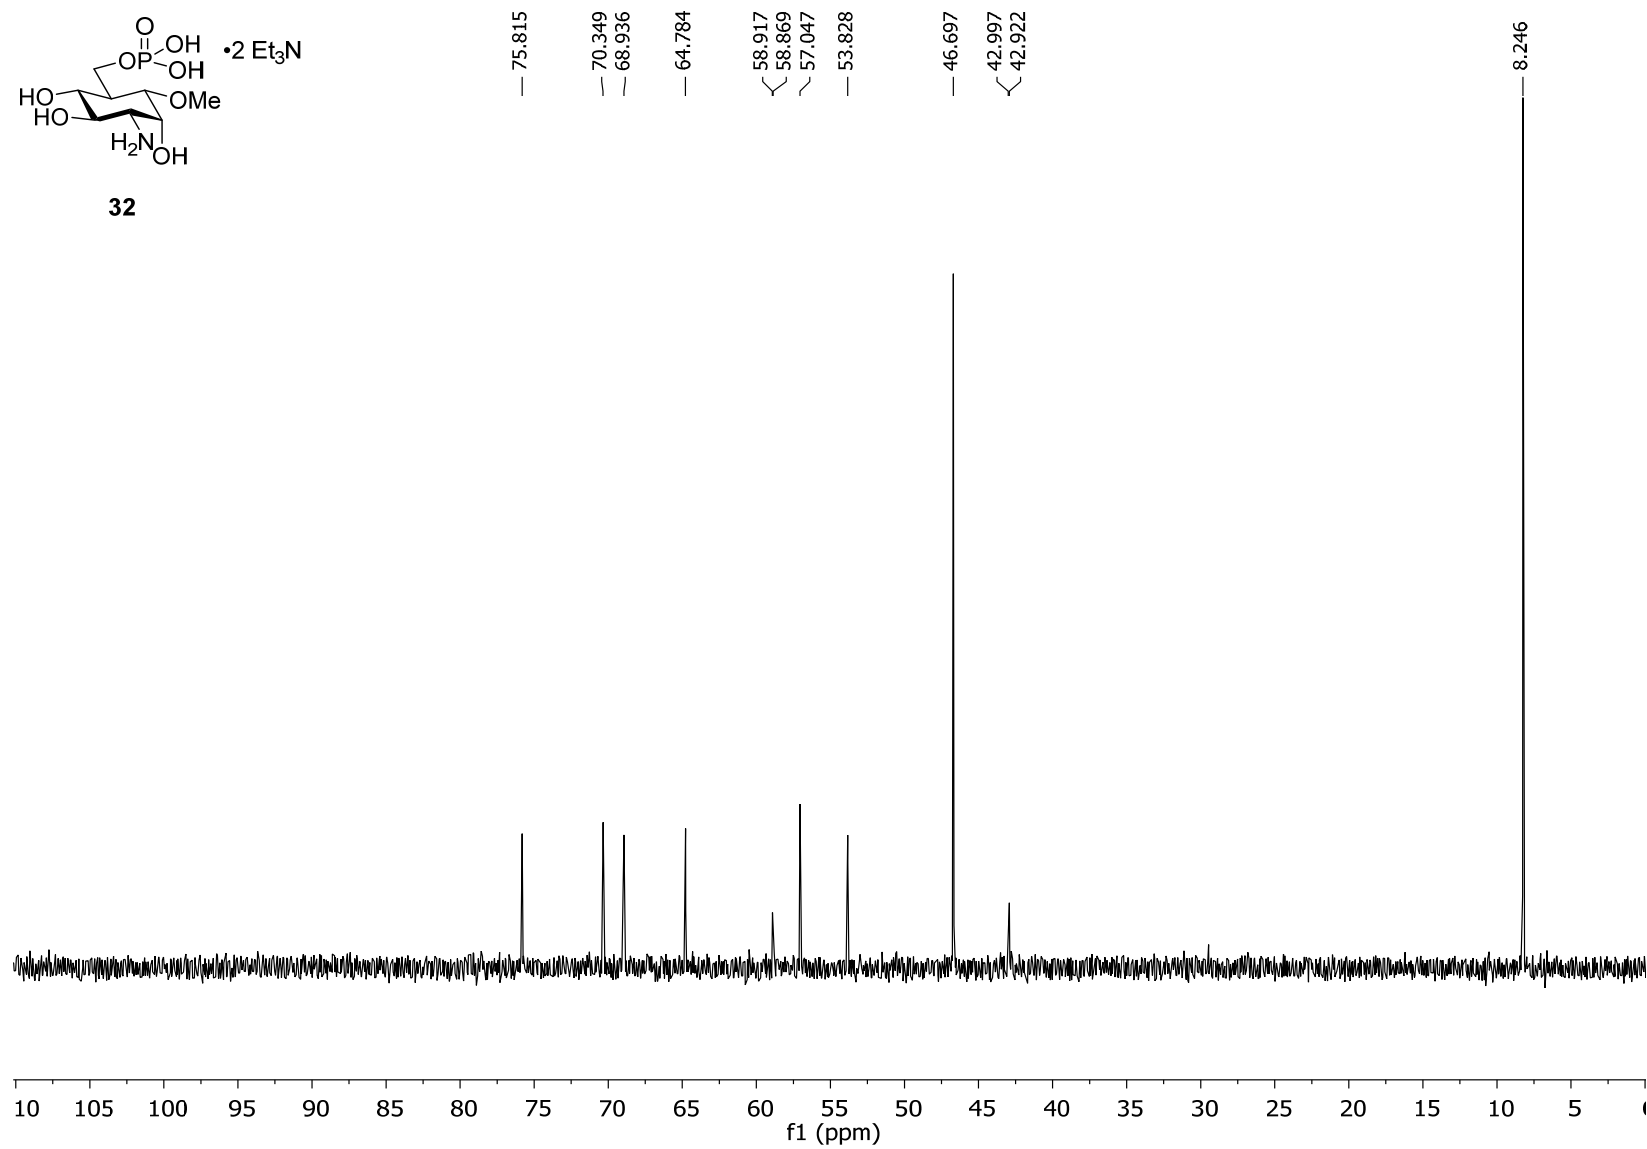

<sup>13</sup>C NMR spectrum (101 MHz, D<sub>2</sub>O) of **32**

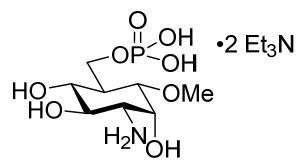

**32**

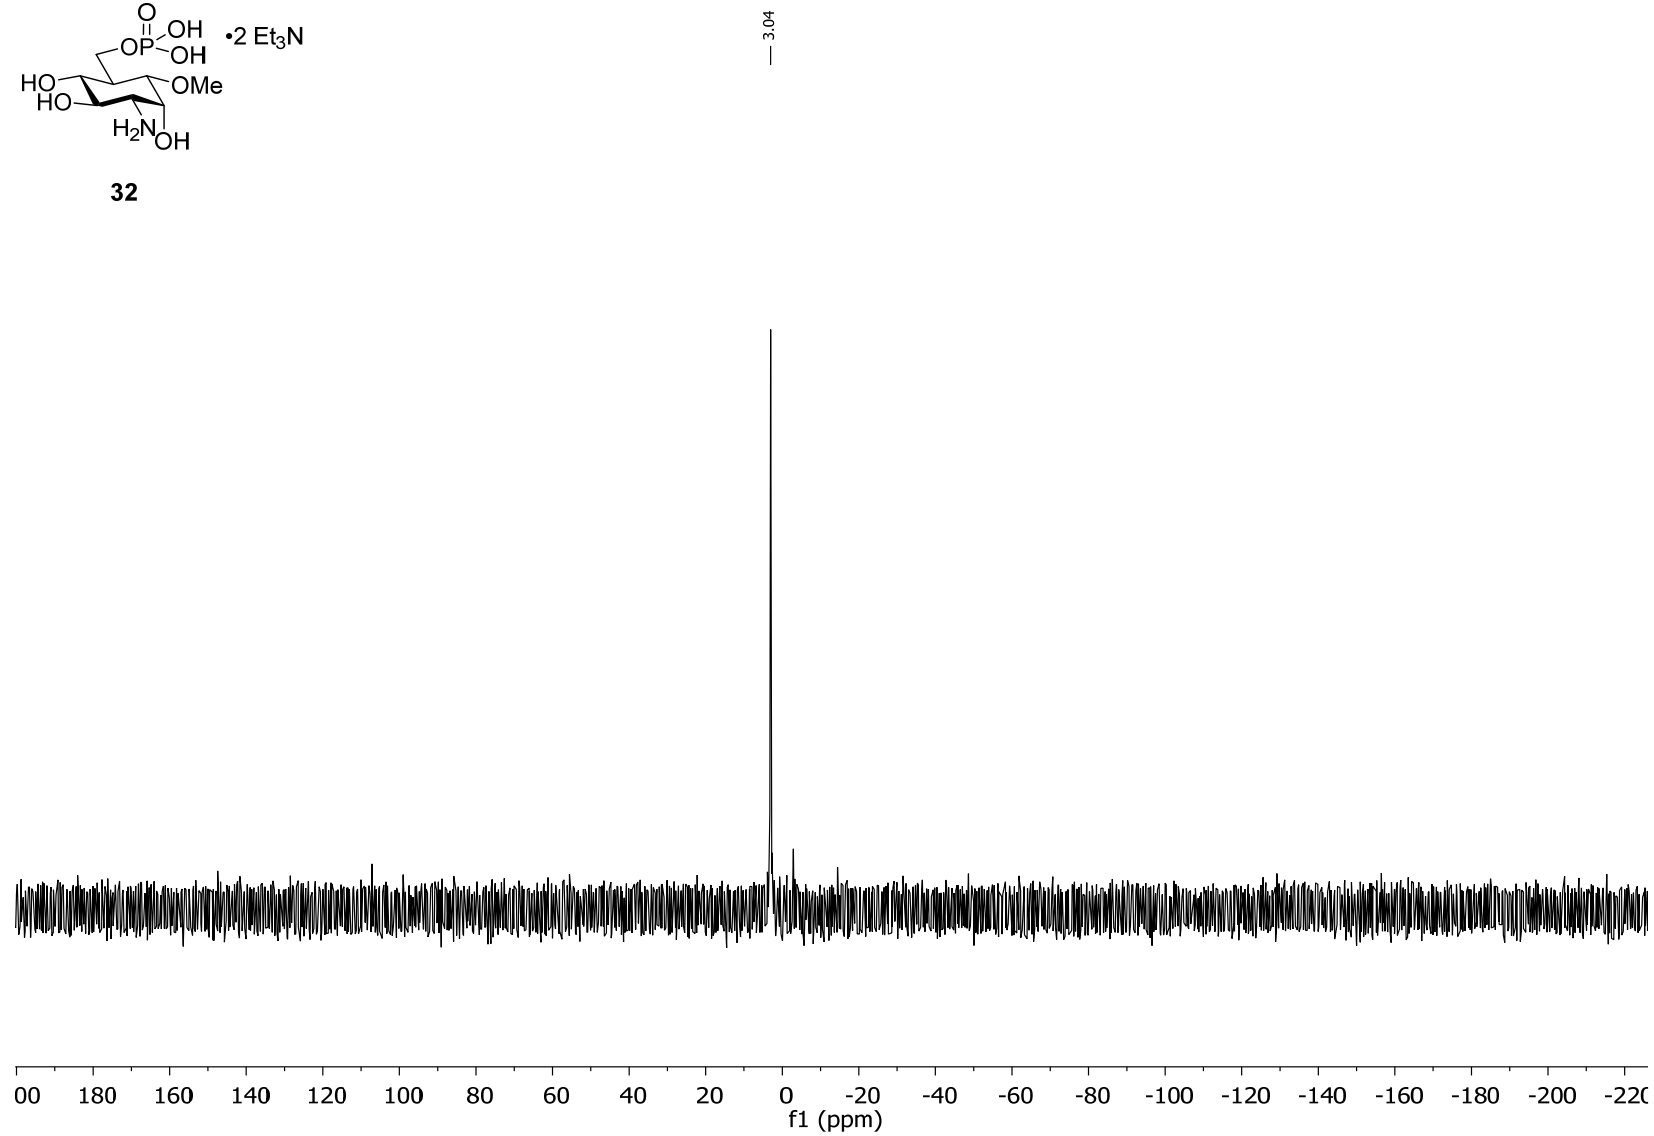

$^3\text{P}$  NMR spectrum (162 MHz,  $\text{D}_2\text{O}$ ) of **32**

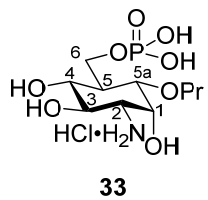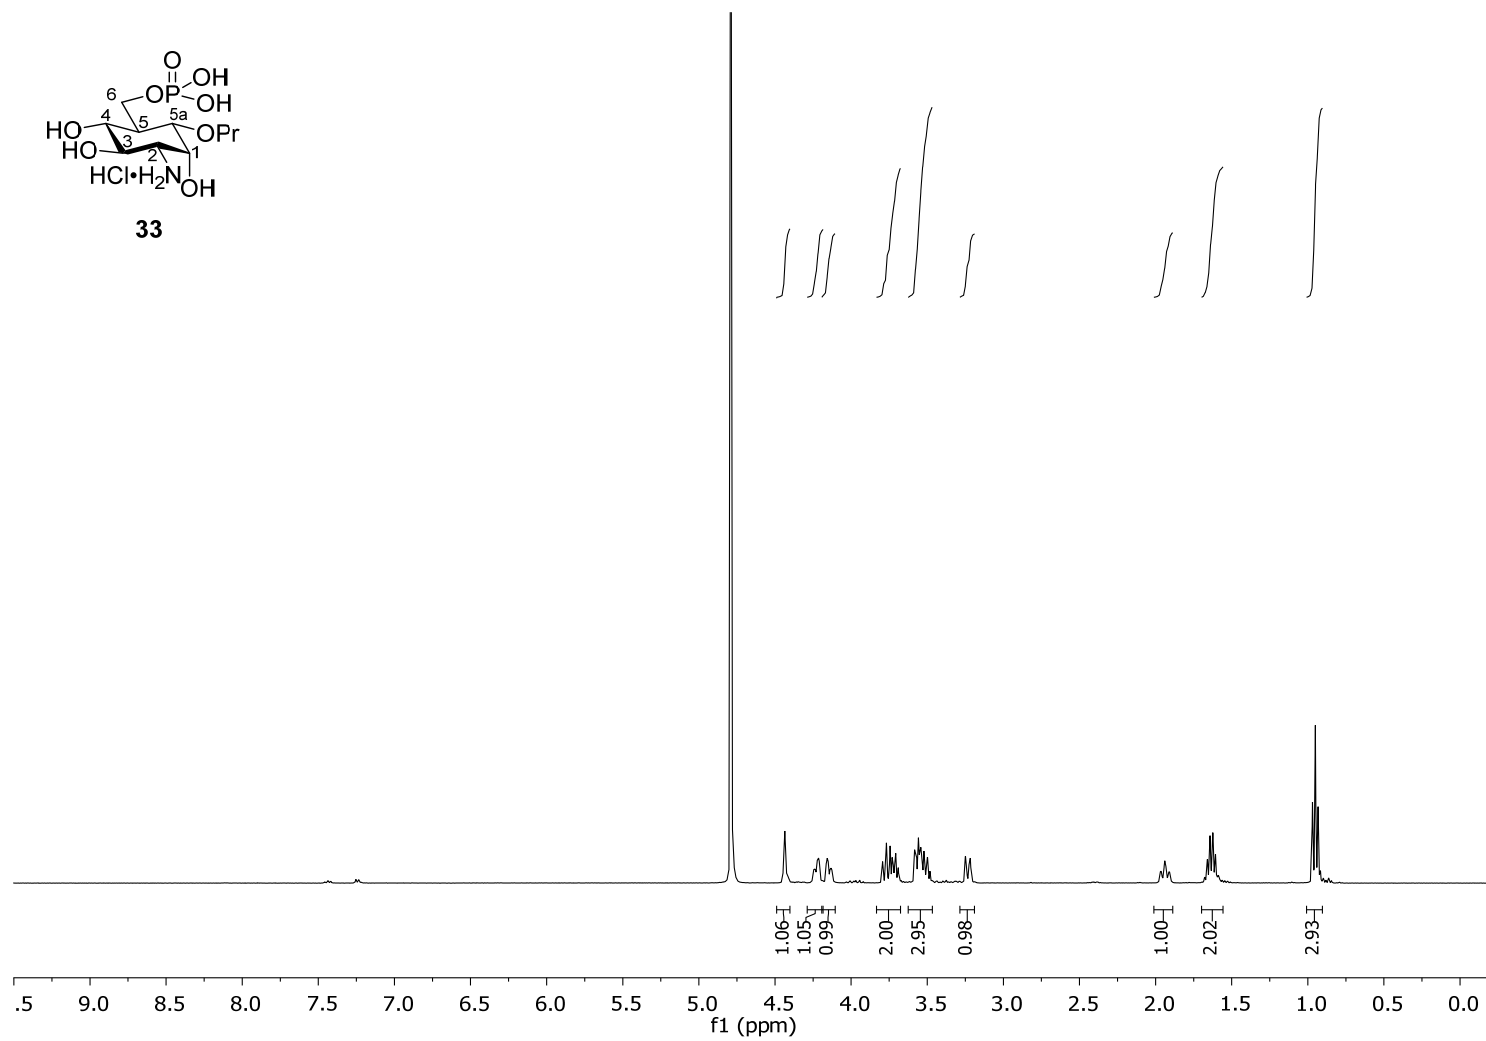

<sup>1</sup>H NMR spectrum (400 MHz, D<sub>2</sub>O) of **33**

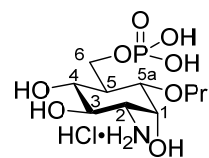

**33**

74.230  
71.959  
70.566  
68.853  
65.351  
60.161  
60.115  
53.610  
42.486  
42.393  
22.297  
9.904

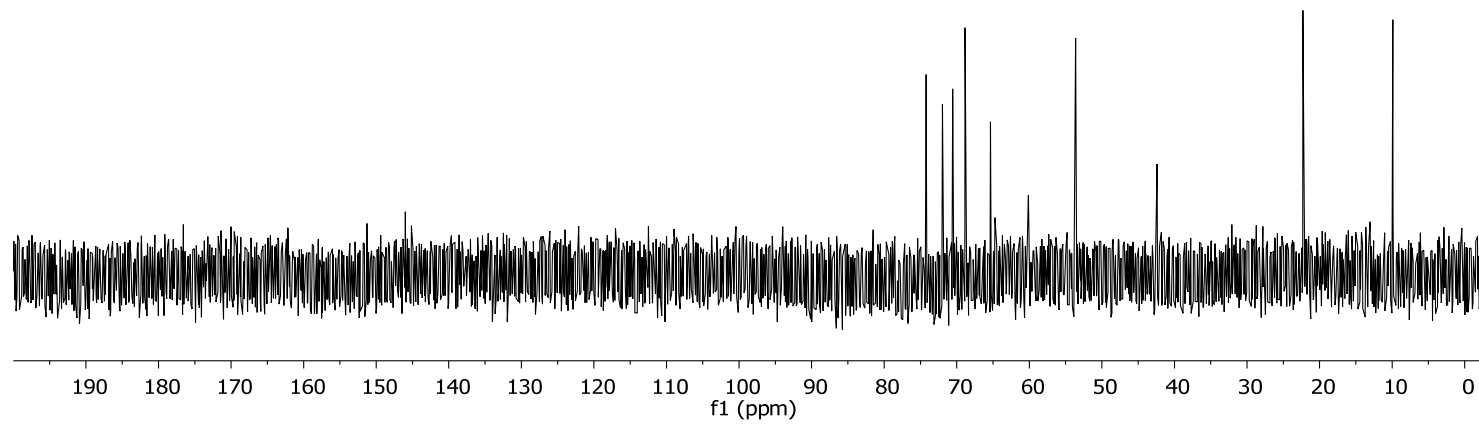

$^{13}\text{C}$  NMR spectrum (101 MHz,  $\text{D}_2\text{O}$ ) of **33**

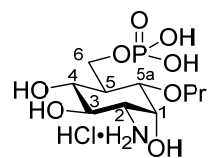

**33**

— 0.20

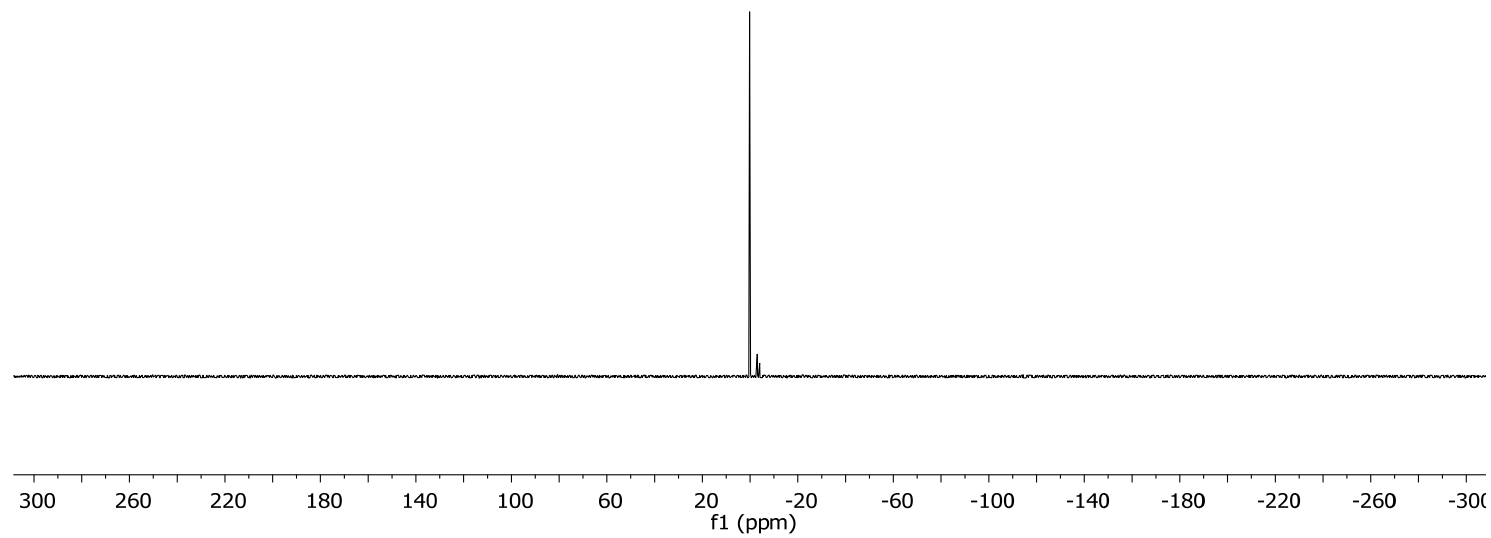

$^{31}\text{P}$  NMR spectrum (162 MHz,  $\text{D}_2\text{O}$ ) of **33**
